# Supplementary material for: Influence of Cooling duration on Efficacy in Cardiac Arrest Patients (ICECAP): study protocol for a multicenter, randomized, adaptive allocation clinical trial to identify the optimal duration of induced hypothermia for neuroprotection in comatose, adult survivors of after out-of-hospital cardiac arrest
Source: PubMed Central journal article supplement (PMC11264458; doi:10.1186/s13063-024-08280-w), 2024-07-23
Supplement: 13063_2024_8280_MOESM3_ESM.pdf [file 13063_2024_8280_MOESM3_ESM.pdf]

# Bayesian Adaptive Trial Design for the Influence of Cooling duration on Efficacy in Cardiac Arrest Patients (ICECAP)

Berry Consultants, LLC  
Last Updated April 22, 2020

## 1.0 Background

This is a multicenter, randomized adaptive clinical trial in comatose adult survivors of out of hospital cardiac arrest that have already been rapidly cooled. A maximum of 1800 patients will be enrolled. The primary endpoint is a weighted modified Rankin Score (mRS) measured at 90 days after the return of spontaneous circulation. This trial will enroll patients with and without initial shockable rhythms. Within each rhythm type, patients will be adaptively randomized to a cooling duration. The primary objective of this trial is to characterize, for each rhythm type, the duration-response curve for cooling and to identify the duration that provides the maximum treatment effect, referred to as the *target* duration. This document describes the complete details of the adaptive trial design, including statistical model, design parameters, and the operating characteristics.

## 1.1 Treatment Arms

All subjects will have already been rapidly cooled ( $33\text{ }^{\circ}\text{C} \pm 0.5^{\circ}\text{C}$ ) and will then be randomized to one of ten treatment arms for the duration of cooling. The ten treatment arms are 6, 12, 18, 24, 30, 36, 42, 48, 60, or 72-hours of cooling. For statistical modeling we label these arms as  $h=1,2,\dots,10$ .

## 1.2 Primary Endpoint

The primary endpoint is the 90-day modified Rankin score (mRS). The mRS is an integer-valued outcome from 0 to 6, with smaller values indicating a better neurological status. A summary of each of the outcomes is:

- 0 = No symptoms
- 1 = No significant disability; able to carry out all usual activities
- 2 = Slight disability; can look after own affairs, but unable to carry out all previous activities
- 3 = Moderate disability; require some help
- 4 = Moderately severe disability; unable to attend to own bodily needs without assistance
- 5 = Severe disability; bedridden and requiring constant nursing care and attention
- 6 = Dead

### 1.3 Primary Analysis

The primary endpoint is the 90-day mRS. The primary analysis weights the 7 possible 90-day mRS values. Let  $M_{90}$  be the 90-day mRS. The weight for each possible mRS value,  $M_{90}$ , is

$$W(M_{90}) = \begin{cases} 10 & M_{90} = 0 \\ 9 & M_{90} = 1 \\ 8 & M_{90} = 2 \\ 6 & M_{90} = 3 \\ 0 & M_{90} = 4,5,6 \end{cases}$$

For each treatment arm the mean weighted outcome is modeled. For any treatment arm, let  $p_0 \dots p_6$  be the probability of each outcome. The mean weight for the treatment arm is

$$\sum_{m=0}^6 p_m W(m)$$

The primary analysis of the trial will model the mean weighted mRS for each treatment arm. Let  $\theta_{h,r}$  be the mean weighted 90-day mRS for treatment arm  $h$  within rhythm type  $r$ . The rhythm types are labeled as  $r = 1$  (shockable) and  $r = 2$  (not shockable).

The primary analysis is conducted separately for each rhythm type and has two components. First, we identify the most likely target duration, where the target duration is the shortest duration that achieves the maximum treatment effect (target duration is further described in Section 2.3.1). Second, to determine if cooling is effective in increasing the rate of good neurological outcomes, in the absence of a control arm, we calculate whether the most likely target duration is superior to the shorter durations of cooling. If so, this indicates cooling is effective in that at least one part of the duration-response curve is increasing.

1. The treatment arm that is the most likely target duration for rhythm type  $r$  is  $h^*$  such that the posterior probability  $h$  is the target duration is maximized (see Section 2 for complete details).

2. The conclusion that cooling duration  $h^*$  is effective in rhythm type  $r$  is made if the posterior probability that the mean weighted 90-day mRS for arm  $h^*$  is greater than the mean weighted 90-day mRS for a duration shorter than  $h^*$ , is greater than 0.975. That is, for some  $h < h^*$ ,

$$\Pr(\theta_{h^*,r} > \theta_{h,r} \mid \text{data}) > 0.975$$

The statistical modeling is further described in Section 2.

## 1.4 Analysis Population

All analyses will be based on the intent-to-treat ITT population. The ITT patient population will include all patients randomized, where patients will be included in the treatment arm to which they were randomized, regardless of the duration of cooling applied.

It is anticipated that subjects may initially be perceived to be of one rhythm type and later found to be of the other rhythm type. In the ITT analyses, these subjects will be included with their corrected rhythm type, but their treatment arm will remain as randomized.

Any subjects that are missing or withdraw from the study and have an unknown 90-day mRS will be included in the analyses of the primary endpoint with multiple imputation according to the longitudinal model described in Section 2.2.

## 1.5 Randomization

The first 200 subjects enrolled overall between the two rhythm types will be randomized equally (1:1:1) between three treatment arms: 12 hours, 24 hours, and 48 hours. After these first 200 patients have been enrolled, patients will be allocated to treatment arms (durations 12 to 48) based on response adaptive randomization (RAR). RAR will be applied separately within each rhythm type. During RAR, interim analyses will be conducted approximately every 50 enrollments in order to update the response adaptive randomization probabilities. The response adaptive randomization probabilities determined at each interim analysis will be applied for the newly enrolling subjects until the next interim analysis and update. Section 2 describes the calculation of the response adaptive randomization probabilities.

The 6, 60, and 72-hour duration treatment arms are initially closed to enrollment. The 6-hour duration treatment arm will be opened for a rhythm type  $r$  if there are more than 100 subjects enrolled across all arms in that rhythm type and there is at least a 0.33 probability that 6 hours is the target duration for that rhythm type. The 60 and 72-hour duration treatment arms will be opened incrementally. These arms open on either rhythm if there is at least a 0.33 probability that the target duration for that rhythm type is at or above that next shorter duration.

## 1.6 Stopping Rules

Interim analyses begin after 200 patients have been enrolled and will occur about every 50 enrollments. At each interim analysis, the trial may stop for futility if no cooling duration greater than 6 hours is found to be more effective than the 6-hour duration. Futility will be assessed separately for each rhythm type. Therefore, the trial could be declared futile for one rhythm type, and yet continue to enroll subjects of the opposite rhythm type. If both rhythm types are not stopped for futility, the trial will continue to enroll to the maximum sample size of 1800 patients. Specifically, a rhythm type will stop for futility if

1. At least 50 patients have been randomized to the 6-hour duration arm for that rhythm
2. There is at least a 50% probability that the 6-hour duration treatment arm is the target duration

## 2.0 Statistical Modeling

This section describes the statistical models used in the adaptive design and the primary analysis. The modeling is Bayesian in nature. All conclusions about each treatment arm will be based on a duration-response model. We use an inverted U-shaped duration-response model for modeling the mean weighted 90-day mRS for each treatment arm. Identical instances of the model are used for each rhythm type. During the trial, at the interim analyses, patients with unknown 90-day mRS values are modeled using a longitudinal model based on earlier, 30-day mRS, values. This same longitudinal model is used to handle missing data for the primary analysis at the conclusion of the trial.

The inverted U-shaped duration-response model is described in Section 2.1, the longitudinal model is described in Section 2.2, the Bayesian quantities calculated at each interim analysis are described in Section 2.3, and the calculation of the response adaptive randomization probabilities is described in Section 2.4.

Let the observed weight for a patient  $i$  be  $W_i$ . The mean weighted 90-day mRS value for an individual duration,  $\bar{W}_{h,r}$ , are modeled as normally distributed:

$$[\bar{W}_{h,r}] \sim N(\theta_{h,r}, \frac{\sigma_r^2}{n_{h,r}})$$

where the treatment arm is  $h$  and the rhythm type is  $r$ . The patient-level utility responses are bounded between 0 and 10, and likely non-normally distributed, but the mean response at a duration, within a rhythm type will be almost exactly normally distributed for sample sizes  $\geq 10$ . The variance components are modeled separately for each rhythm type, with weak prior distributions:

$$[\sigma_r^2] \sim \mathcal{IG}(2.5, 22.5) \text{ for } r = 1, 2$$

## 2.1 Duration Response Model for Weighted mRS

We model the mean weighted 90-day mRS across the ten treatment arms with a duration-response model. The duration response model is a critical aspect to the adaptive design and the primary analysis. The duration response model restricts the shape of the duration response curve to have 3 phases – an increasing phase, a plateau phase, and a

decreasing phase. We create a parametric family for this inverted-U duration response model. For each rhythm type a separate and identical instance of the model is used, therefore we present the details for a single instance.

The duration-response model is:

$$\theta_h = \begin{cases} \beta_0 + \beta_1 h^{\beta_3} & h \leq \gamma_1 \\ \beta_0 + \beta_1 \gamma_1^{\beta_3} & \gamma_1 < h \leq \gamma_2 \\ \beta_0 + \beta_1 \gamma_1^{\beta_3} - \beta_2 (h - \gamma_2)^{\beta_4} & \gamma_2 < h \end{cases}$$

In addition, the values of  $\theta_h$  will be restricted to be between 0 and 10. We refer to the parameters  $\gamma_1$  and  $\gamma_2$  as the change-points. The parameter  $\gamma_1$  represents the change point between the increasing phase and the plateau phase. The duration response curve is “flat” between  $\gamma_1$  and the second change point,  $\gamma_2$ .  $\gamma_2$  represents the change point between this plateau phase and the decreasing phase, so the duration response curve is then decreasing after  $\gamma_2$ . An important aspect of the model is that the change-points can be smaller than the minimum cooling duration,  $h=1$  (6 hours), or greater than the maximum cooling duration,  $h=10$  (72-hours), thus allowing the curve to be increasing, decreasing, or flat over the entire range of cooling. The model has the following constraints:  $\gamma_1 < \gamma_2$  and  $\beta_1, \beta_2, \beta_3, \beta_4 > 0$ . Figure 1 shows an example duration-response curve with parameters  $\gamma_1=4.33$ ,  $\gamma_2=6.33$ ,  $\beta_0=3$ ,  $\beta_1=0.32$ ,  $\beta_2=0.30$ ,  $\beta_3=1.2$ , and  $\beta_4=1$ .

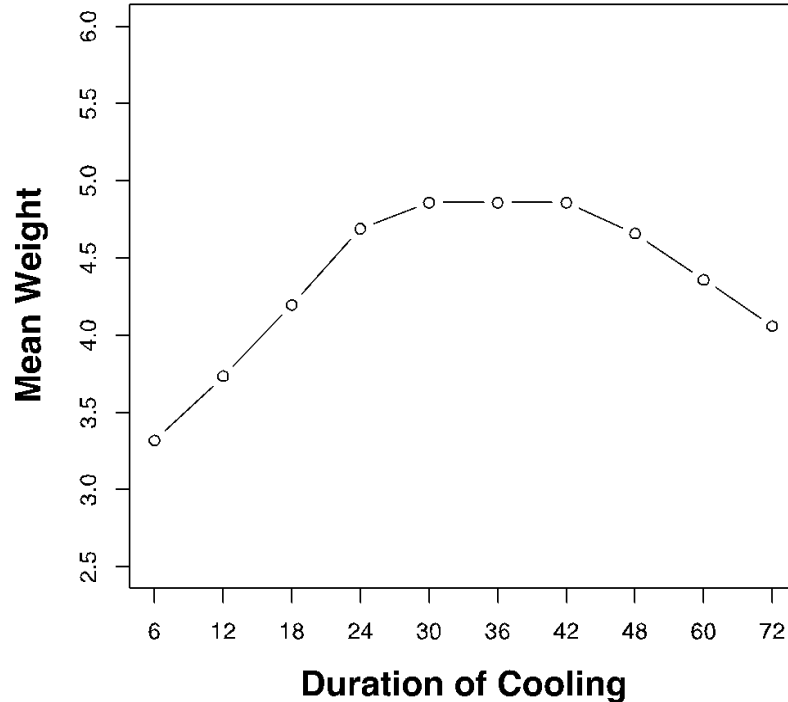

Figure 1: An example duration response curve

The  $\nu_i$  parameter is interpreted as the theoretical optimal duration of cooling, the shortest duration that achieves the maximum treatment effect. We define the *target duration* based on  $\nu_1$  and  $\nu_2$ . The target duration is the shortest duration greater than  $\nu_1$ , if  $\nu_1$  is less than 72-hours, or the longest duration if  $\nu_1$  is greater than 72-hours.

Because the modeling is done separately for each rhythm type, we add a subscript  $r$  on the parameters to notate the specific rhythm type. The prior distributions for the

“change-points” are defined on the space where  $\gamma_1^r < \gamma_2^r$  as follows:

$$\left[ \gamma_1^r \right] \propto N(4, 10^2) \text{ for } r=1,2$$

and

$$\left[ \gamma_2^r \right] \propto N(8, 3^2) \text{ for } r=1,2.$$

The following priors for each instance are utilized:

$$\left[ \beta_0^r \right] \sim N(4, 4^2) \text{ for } r=1,2$$

$$\left[ \beta_j^r \right] \propto 1 \text{ for } j=1, \dots, 4; r=1,2,$$

For the final analysis the selection of the most likely optimal duration within each rhythm type is selected using this model described above. For the determination of a positive treatment effect the posterior distribution using a hierarchical model is used. The following hierarchical prior structure is used:

$$\left[ \gamma_1^r \right] \propto N(\mu_1, \tau^2) \text{ for } r=1,2$$

and

$$\left[ \gamma_2^r \right] \propto N(\mu_2, \tau^2) \text{ for } r=1,2.$$

With hyperparameters

$$\left[ \mu_1 \right] \sim N(4, 10^2)$$

and

$$\left[ \mu_2 \right] \sim N(8, 3^2)$$

and

$$[\tau^2] \sim \mathcal{IG}(0.05, 0.001)$$



## 2.2 Longitudinal Modeling

At each interim analysis, and at the final analysis, there will be subjects who have an unknown 90-day mRS value. We use the 30-day mRS value as possibly predictive of the 90-day mRS, allowing subjects with this earlier measurement to be included in the analyses of the 90-day measurement. This modeling is referred to as the longitudinal model. The longitudinal model allows for learning the relationship between the 30-day and 90-day mRS values as the accruing empirical data is used to determine the strength of the association between the two values for each treatment arm and rhythm type. Analyses of the 90-day mRS values are performed with multiple imputation from the longitudinal model for patients with an unknown 90-day mRS value.

The longitudinal model maps the 7 possible 30-day mRS values to the 7 possible 90-day mRS values. We present a Markovian structure for the “transitions” from the 30-day mRS state ( $k$ ) to the 90-day mRS state ( $j$ ). The transition matrix,  $P$ , represents the matrix of probabilities for a subject transitioning from the 30-day mRS state (rows) to the 90-day mRS state (columns). For example,  $p_{32}$  is the probability a subject that is a 30-day mRS of 3 becomes a 2 at 90-days.

$$P = \begin{bmatrix} p_{00} & p_{01} & \cdots & p_{05} & p_{06} \\ p_{10} & p_{11} & & p_{15} & p_{16} \\ & & \ddots & & \\ \vdots & \vdots & & p_{kj} & \vdots \\ & & & & \ddots \\ p_{60} & p_{61} & & p_{65} & p_{66} \end{bmatrix}$$

We place a Dirichlet prior distribution on each vector of probabilities from each state at 30 days to each state at 90 days:

$$(p_{k0} \ \cdots \ p_{k6})^T \sim \text{Dirichlet}((\alpha_{k0} \ \cdots \ \alpha_{k6})^T) \text{ for } k=0, \dots, 6$$

For all treatment arms and both rhythm types we assume the following prior weights for the transitions (included is the assumption that all transitions from a 30-day mRS of 6 are to a 90-day mRS of 6):

$$\alpha_{kj} = \begin{cases} 0.1, & k \neq 6 \\ 0, & k = 6, j \neq 6 \\ 1, & k = 6, j = 6 \end{cases}$$

Each prior weight can be interpreted as the number of subjects that have made that particular transition. Thus, these prior weights will be quickly overwhelmed by the accruing empirical data and yet provide reasonable estimates if the data are minimal for an mRS state.

The probability vectors have separate posterior distributions by treatment arm and rhythm type. The observed transitions for the same treatment arm  $h$  and rhythm type  $r$  contribute fully to that particular posterior distribution, while the transitions from other treatment arms and for other rhythm types contribute 1/4 of their full weight to the posterior distribution. Thus, there is borrowing of partial information from other treatment arms and the opposite rhythm type.

Let the number of subjects in the trial that transition from mRS state  $k$  at 30-days to mRS state  $j$  at 90-days, for treatment arm  $h$  and rhythm type  $r$ , be

$$T_{h,r}(k,j).$$

We model the posterior distribution for the probability vector from mRS state  $k$ , for treatment arm  $h$  and rhythm type  $r$  as

$$Z_{h,r} = \begin{pmatrix} P_{k0} \\ \vdots \\ P_{kj} \\ \vdots \\ P_{k6} \end{pmatrix} = Dir \begin{pmatrix} \alpha_{k0} + T_{h,r}(k,0) + \frac{1}{4} \sum_{h',r' \in (h,r)'} T_{h',r'}(k,0) \\ \vdots \\ \alpha_{kj} + T_{h,r}(k,j) + \frac{1}{4} \sum_{h',r' \in (h,r)'} T_{h',r'}(k,j) \\ \vdots \\ \alpha_{k6} + T_{h,r}(k,6) + \frac{1}{4} \sum_{h',r' \in (h,r)'} T_{h',r'}(k,6) \end{pmatrix}$$

where  $(h,r)'$  refers to all treatment arms and the rhythm type that are different than the  $(h,r)$  pair.

## 2.3 Bayesian Quantities

The following Bayesian quantities are calculated for each analysis. Each of these quantities are calculated using the data from all subjects in the trial—those with complete 90-day mRS values and those with only 30-day mRS values.

### 2.3.1 Most Likely Target Duration

The target duration is defined as the shortest duration that achieves the maximum treatment effect. As described in Section 2.1, the target duration is defined based on the duration-response model as the shortest duration greater than  $\nu_1$ , if  $\nu_1$  is less than 72-hours, or the longest duration if  $\nu_1$  is greater than 72-hours.

At each analysis the posterior probability that each treatment arm is the target duration is calculated for each rhythm type. The treatment arm with the highest posterior probability of being the target duration for a particular rhythm type is the most likely target duration for that rhythm type. We label the probability a treatment arm  $h$  is the target duration for rhythm type  $r$  as

$$\Pr_{h,r}$$

### 2.3.2 Posterior Variance

For each treatment arm  $h$  and rhythm type  $r$  we calculate  $\theta_{h,r}$ , the posterior mean weighted 90-day mRS and  $V(\theta_{h,r})$ , the posterior variance of  $\theta_{h,r}$ .

### 2.3.3 Posterior probability superior to smaller duration

Within each rhythm type  $r$ , and each duration  $h$ , we calculate the posterior probability that it has a superior mean weighted 90-day mRS as compared to each treatment arm with a shorter cooling duration. Because of the duration-response model, it is sufficient to calculate only the posterior probability that a treatment arm is superior to the 6-hour duration arm. We refer to the posterior probability that each treatment arm is superior to a shorter duration treatment arm as

$$\Pr(\theta_{h,r} > \theta_{1,r} \mid \text{data}).$$

This quantity is calculated using both independent priors and using the hierarchical priors.

## 2.4 Adaptive Randomization

During the response adaptive randomization stage, separate allocation schemes are created for each rhythm type. The specification of the vector of probabilities for randomization is defined in this section. Randomization probabilities to each treatment arm are weighted according to the posterior probability that each treatment arm is the target duration. The goal of the adaptive randomization is to allocate subjects to the arms most likely to be the target duration, but also to learn effectively about the duration-response curve.

The randomization probabilities for each treatment arm within each rhythm type are proportional to  $\text{Pr}_{h,r}$ , the probability that a treatment arm is the most likely target duration for a rhythm type  $r$ .

$$q_{h,r} = \frac{\text{Pr}_{h,r} \delta_{h,r}}{\sum_{l=1}^{10} \text{Pr}_{l,r} \delta_{l,r}} \text{ for } h = 1, 2, \dots, 10$$

The treatment arms for 6-hours ( $h=1$ ), 60 hours ( $h=9$ ), and 72 hours ( $h=10$ ) will initially be closed, but may be later opened according to the rules described in Section 1.5. If a treatment arm is open we set  $\delta_{h,r} = 1$ , and if a treatment arm is closed we set  $\delta_{h,r} = 0$ . Therefore, the adaptive allocation scheme favors the arms most likely to be the target duration, but also favors arms with a greater variability (uncertainty) around the primary endpoint or a smaller sample size.

### **3.0 Section intentionally left blank**

Reserved for future use.

## 4.0 Operating Characteristics

The operating characteristics of the design are calculated using simulation. We consider a variety of scenarios for the true duration-response curve. There are many possible performance measures for this design including the probability of selecting each duration, the probability cooling is considered effective, the mean number of patients allocated to each duration, and the probability of opening the 6, 60, or 72-hour durations. In order to calculate such properties of the design, we create a methodology for simulating virtual patients. This is described in Section 4.6.

Section 4.1 addresses the type I error of the design. We define Type I error as the probability, across all doses, that cooling is considered effective when in truth, the duration response curve is flat.

Sections 4.2, 4.3, and 4.4 address the probability of success, or power of the design when there is a positive duration-response relationship. These sections show the properties of the design for different assumed effect sizes and shapes of the duration-response curves. There are two objectives of this trial and we define the probability of success for each. The first objective is to select a target duration. For each scenario, we define clinically acceptable durations. First there is the optimal duration, which is the shortest duration that achieves the maximum treatment effect. We additionally identify durations that are considered clinically acceptable. These durations must be within 12 hours of the optimal duration and must achieve at least 70% of the maximum treatment effect. We define power for this objective as the probability any one of these clinically acceptable durations is selected as the target duration. The second objective is to determine if there is a positive duration-response curve (i.e. that cooling is effective). We define power for this objective in scenarios where there is positive effect of cooling, as the probability the duration-response curve is found to be positive, regardless of the selected target duration.

### 4.1 Final Analysis and Type I Error

This section discusses the final primary analysis and the threshold for success. The final primary analysis within each rhythm type is to test whether the duration-response is positive for a range of durations. The parametric structure of the duration-response model is one that forces the effect to be one of the following:

1. Decreasing effect over all durations
2. A plateau effect (same response) for all durations
3. A plateau effect for a range of durations then a negative effect for longer durations.
4. Increasing effect over all durations
5. Increasing effect for a range of durations then becoming a plateau
6. Increasing effect for a range of durations, then a plateau effect for a range of durations, then becoming a negative effect.

Because of these limited relationships, if any of the truths in 4-6 above are the reality this would entail that there is an increasing benefit for cooling for a range of doses. The

primary analysis will calculate the posterior probability that one of these relationships hold. In this modeling scenario this is equivalent to testing whether the most likely target duration is more effective than a smaller duration.

The trial design is Bayesian and hence the primary analysis is a conclusion using the posterior probability that the selected target duration is superior to smaller durations. The final analysis of a 97.5% cut-off for the posterior probability will be used and was selected as an appropriately judged threshold for success. This analysis is appropriate given the multiple interim analyses and unusual nature of investigating a positive duration response model with no control arm, no predefined maximum arm, and the possibility of a non-monotonic duration response.

We simulate different null scenarios to understand the type I error of the design and analysis. The design of this trial does not increase type I error. There is no early stopping for success in the trial, nor is there selection of patient subgroups. The adaptations used in this trial are response adaptive randomization (RAR) and futility stopping. Depending on the circumstances RAR may increase or decrease type I error. Imbalance in covariates can cause type I errors, but RAR will typically decrease type I errors. This is because under the null hypothesis where all arms are equal, an arm that performs better by chance will receive more subjects, allowing a greater ability to diagnose the lack of efficacy. In addition, futility stopping also decreases type I error. The question of type I error control is then whether the method for the primary analysis maintains control of type I error. We present simulations of the type I error rate for this design and analysis to understand the type I error.

Under the null hypothesis, that all durations have the same utility, the simulated type I error may depend on the relative probabilities of the mRS outcomes, the accrual rates, the longitudinal pattern of 30-day mRS to 90-day mRS, and the proportion of subjects in each rhythm type. We present several null scenarios to explore the null space and report the simulated type I error.

The following null cases are simulated. Each case has an assumed accrual rate, longitudinal pattern, proportion of subjects that are shockable, and distribution of mRS values. The medium (med) accrual rate is a maximum of 8.65 subjects per week. The fast accrual rate is 50% faster, reaching a maximum of 12.98 subjects per week, and the slow is 50% slower, reaching a maximum of 4.33 subjects per week. The slow accrual rate is used as the typical scenario, anticipating that slower accrual may inflate the type I error. The “Long” column reports the longitudinal pattern of the 30-day mRS value. The longitudinal pattern 1 is the pattern presented in Section 4.6, while a value of 2 means each value is equally likely to have occurred at 30-days given the 90-day value (except death is still expected in 50% of 90-day deaths). The “Prob Shock” column is the proportion of subjects enrolled with a shockable rhythm. The 7 mRS columns report the probability of each mRS outcome. The probabilities of each mRS outcome for each treatment arm are identical (hence no benefit to extended cooling). The simulation frequency of meeting the primary efficacy outcome, of a posterior probability of at least 97.5% for a positive duration-response model for each

rhythm type, regardless of the target duration selected, are reported in the last two columns. For scenarios 1-6, the two rhythm types are the same, and each with equal effects across all durations, so the average probability of a positive duration response is reported. In Scenarios 7 through 13 the results per rhythm type are important and are listed (shock/non-shock).

| Null Case | Accrual | Long | Prob Shock | Probability of Each mRS Value |     |     |     |     |     | Probability Positive Duration Response |               |
|-----------|---------|------|------------|-------------------------------|-----|-----|-----|-----|-----|----------------------------------------|---------------|
|           |         |      |            | 0                             | 1   | 2   | 3   | 4   | 5   |                                        | 6             |
| 1         | Slow    | 1    | 0.50       | .20                           | .15 | .15 | .05 | .05 | .10 | .30                                    | 0.0354        |
| 2         | Slow    | 2    | 0.50       | .20                           | .15 | .15 | .05 | .05 | .10 | .30                                    | 0.0392        |
| 3         | Med     | 1    | 0.50       | .20                           | .15 | .15 | .05 | .05 | .10 | .30                                    | 0.0454        |
| 4         | Fast    | 1    | 0.50       | .20                           | .15 | .15 | .05 | .05 | .10 | .30                                    | 0.0374        |
| 5         | Slow    | 1    | 0.50       | .10                           | .10 | .15 | .10 | .05 | .10 | .40                                    | 0.0318        |
| 6         | Slow    | 1    | 0.50       | .25                           | .20 | .20 | .10 | .05 | .10 | .10                                    | 0.0444        |
| 7         | Slow    | 1    | 0.55       | .20                           | .15 | .15 | .05 | .05 | .10 | .30                                    | 0.0352/0.0308 |
| 8         | Slow    | 1    | 0.60       | .20                           | .15 | .15 | .05 | .05 | .10 | .30                                    | 0.0464/0.0376 |
| 9         | Slow    | 1    | 0.65       | .20                           | .15 | .15 | .05 | .05 | .10 | .30                                    | 0.0436/0.0408 |
| 10        | Slow    | 1    | 0.70       | .20                           | .15 | .15 | .05 | .05 | .10 | .30                                    | 0.0384/0.0256 |
| 11        | Slow    | 1    | 0.75       | .20                           | .15 | .15 | .05 | .05 | .10 | .30                                    | 0.0392/0.0264 |
| 12        | Slow    | 1    | 0.80       | .20                           | .15 | .15 | .05 | .05 | .10 | .30                                    | 0.0452/0.0248 |
| 13        | Slow    | 1    | 0.85       | .20                           | .15 | .15 | .05 | .05 | .10 | .30                                    | 0.0424/0.0304 |

Each of the simulations is based upon 2000 simulated trials. The simulated type I error is typically smaller than 0.05 (a one-sided type I error). The different underlying distribution of mRS can have subtle effects on the behavior of the dose-response model. Cases 1 and 5 use the same assumptions, except for the distribution of mRS and have simulated type I errors of 0.0318 or 0.0454. The accrual rate and longitudinal pattern have little effect on the simulated type I error. Scenario 6 has a higher likelihood of good outcomes and has a higher type I error rate, 0.0444. The proportion of patients with shockable rhythms versus non-shockable rhythms does not have a large effect on the simulated type I error, unless the rate of subjects within one rhythm type is very small (< 20%), then the type I error is deflated for the smaller group.

Because of design assumptions regarding the distribution of the mRS, our team has a plan to determine the type I error under the actual observed distribution of mRS observed in the trial. By taking all outcomes in the trial, and then using numerical simulation to pull subjects randomly into arms we are creating an additional null scenario that is based on the actual observed distribution of mRS in the ICECAP trial. By observing how many trials are falsely positive, this will provide additional confirmation that type I error is well controlled.

Additional details for the post-trial numerical simulation plan to confirm type I error are as follows. At the conclusion of the trial, the design will be re-simulated using the actual subject data. Within each rhythm type all subjects will be placed in a list with their arm



assignment removed. Subjects will be randomly sampled or “bootstrapped” from this list and assigned a duration. This creates a setting where, theoretically, all durations have the same treatment effect as all subjects are drawn from the same pool. The post-simulation type I error will be reported as the type I error for the trial. The 97.5% threshold will be used for primary success, regardless.

The post-simulation type I error for the observed posterior probability that cooling is effective within each rhythm type will be reported. So, for example, it may be reported that the post-simulation type I error for an observed threshold of 99.4% within the shockable rhythm type is 0.004. The post-simulation type I error calculation details will be presented for understanding, while the posterior probability of a positive duration-response and the probability of each duration being the target duration will be the primary analysis summaries.

## 4.2 Power: Duration-response curves are the same in both rhythm types

In these scenarios, the duration response curve is the same in both rhythm types (shockable and non-shockable) and we explore different magnitudes of treatment effects and shapes for the duration-response curve. Each of the scenarios in this section assumes that 50% of patients will be in each rhythm type. Sensitivity to this assumption is presented in Section 4.4.

For each scenario, we present by rhythm type the assumed true mean weighted mRS score for each treatment arm, the probability each arm is selected as the target duration ( $\text{Pr}(\text{Target})$ ), the probability the arm is both selected as the target duration arm and is considered more effective versus a shorter duration ( $\text{Pr}(\text{Target} \& \text{Eff})$ ), the mean number of patients allocated to each arm, and the total mean sample size. For each scenario, the clinically acceptable durations are shown in red italics. In section 4.6 we show, for each mean weighted mRS in these scenarios, the corresponding unique proportion of patients with each mRS outcome at 90 days. Operating characteristics are based on 2000 simulations of each scenario. They are summarized in the following table and then presented in detail for each scenario.

| Table 4.2 Section Summary              | Shockable Rhythm |       |       | Non-Shockable Rhythm |       |       |
|----------------------------------------|------------------|-------|-------|----------------------|-------|-------|
|                                        | SAT              | Pos   | Fut   | SAT                  | Pos   | Fut   |
| Small Effect at 18 hours               | 0.643            | 0.556 | 0.022 | 0.637                | 0.547 | 0.019 |
| Strong Effect at 30 hours              | 0.78             | 0.935 | 0.003 | 0.781                | 0.938 | 0.003 |
| U-shaped duration response             | 0.832            | 0.709 | 0.013 | 0.824                | 0.699 | 0.018 |
| Increasing duration response           | 0.39             | 0.847 | 0.015 | 0.396                | 0.845 | 0.02  |
| Larger treatment effect at 48 hours    | 0.777            | 0.994 | 0.002 | 0.763                | 0.993 | 0.002 |
| Cooling longer than 6 hours is harmful | 0.926            | 0     | 0.968 | 0.922                | 0     | 0.966 |
| Treatment effect at 18 hours           | 0.802            | 0.778 | 0.003 | 0.792                | 0.774 | 0.003 |

SAT =  $\text{Pr}(\text{Select Acceptable Target Duration})$

Pos =  $\text{Pr}(\text{Positive Duration Response})$

Fut =  $\text{Pr}(\text{Futility})$

#### 4.2.1 Small Treatment Effect at 18 Hours (Scenario 21.21)

In this scenario, increasing cooling duration provides a small treatment effect and the duration response curve plateaus at 18 hours. The 6-hour arm is enrolled to with 53% probability, the 60-hour arm is enrolled to with 14% probability, and the 72-hour arm is enrolled to with only 1% probability. The trial continues to completion with 98% probability (i.e. will stop early for futility only 2% of the time).

The 18 hours duration, and the two surrounding arms, 12- and 24-hours have the largest sample sizes. The adaptive randomization tends to place patients on these doses in order to identify where the treatment effect plateau begins.

The durations considered clinically acceptable are the 18-, 24-, and 30-hour durations. They are each within 12 hours of the 18-hour duration and offer the same treatment effect. One of these arms is selected with 64% probability in each rhythm type. In total, across all treatment arms, the positive duration-response curve is identified with 55% probability.

**Table 4.2.1A: Summary Scenario Operating Characteristics**

|                                       | Shockable | Non-Shockable |
|---------------------------------------|-----------|---------------|
| Pr(Select Acceptable Target Duration) | 0.643     | 0.637         |
| Pr(Positive Duration Response)        | 0.556     | 0.547         |
| Pr(Futility)                          | 0.022     | 0.019         |
| Pr(Open 6 Hours)                      | 0.540     | 0.523         |
| Pr(Open 60 Hours)                     | 0.138     | 0.147         |
| Pr(Open 72 Hours)                     | 0.014     | 0.012         |

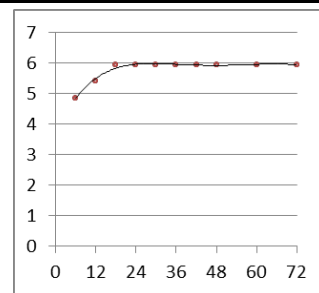

**Table 4.2.2B: Detailed Scenario Operating Characteristics**

|         | Shockable Rhythm  |       |             |                   | Non-Shockable Rhythm |       |             |                   |
|---------|-------------------|-------|-------------|-------------------|----------------------|-------|-------------|-------------------|
|         | Mean Weighted mRS | N     | Pr (Target) | Pr (Target & Eff) | Mean Weighted mRS    | N     | Pr (Target) | Pr (Target & Eff) |
| 6 Hour  | 4.85              | 29.6  | 0.076       | 0.000             | 4.85                 | 28.0  | 0.088       | 0.000             |
| 12 Hour | 5.39              | 156.6 | 0.168       | 0.056             | 5.39                 | 155.6 | 0.160       | 0.062             |
| 18 Hour | 5.93              | 150.1 | 0.333       | 0.210             | 5.93                 | 152.1 | 0.322       | 0.190             |
| 24 Hour | 5.93              | 168.7 | 0.228       | 0.155             | 5.93                 | 169.5 | 0.240       | 0.169             |
| 30 Hour | 5.93              | 110.3 | 0.082       | 0.058             | 5.93                 | 110.4 | 0.075       | 0.053             |
| 36 Hour | 5.93              | 94.2  | 0.046       | 0.032             | 5.93                 | 94.4  | 0.047       | 0.032             |
| 42 Hour | 5.93              | 82.0  | 0.038       | 0.025             | 5.93                 | 82.1  | 0.033       | 0.021             |
| 48 Hour | 5.93              | 100.2 | 0.024       | 0.016             | 5.93                 | 100.5 | 0.028       | 0.017             |
| 60 Hour | 5.93              | 7.3   | 0.004       | 0.004             | 5.93                 | 7.6   | 0.006       | 0.002             |
| 72 Hour | 5.93              | 0.5   | 0.000       | 0.000             | 5.93                 | 0.4   | 0.000       | 0.000             |

#### 4.2.2 Strong Treatment Effect at 30 Hours (Scenario 32.32)

In this scenario, increasing cooling duration provides a stronger treatment effect and the duration response curve plateaus at 30 hours. The 6-hour arm is enrolled to with 25% probability, the 60-hour arm is enrolled to with 49% probability, and the 72-hour arm is enrolled to with 10% probability. The trial continues to completion with 99% probability (i.e. will stop early for futility less than 1% of the time).

The 30-hour duration, and the two surrounding arms, 24- and 36-hours have the largest sample sizes. This allocation aids in identifying the treatment effect plateau. The 24-, 30-, 36- and 42-hour durations are considered clinically acceptable. These arms are selected as the target duration with approximately 78% probability in each rhythm type. The positive duration response curve is identified with 94% probability.

**Table 4.2.2A: Summary Scenario Operating Characteristics**

|                                       | Shockable | Non-Shockable |
|---------------------------------------|-----------|---------------|
| Pr(Select Acceptable Target Duration) | 0.780     | 0.781         |
| Pr(Positive Duration Response)        | 0.935     | 0.938         |
| Pr(Futility)                          | 0.003     | 0.003         |
| Pr(Open 6 Hours)                      | 0.256     | 0.246         |
| Pr(Open 60 Hours)                     | 0.484     | 0.490         |
| Pr(Open 72 Hours)                     | 0.101     | 0.095         |

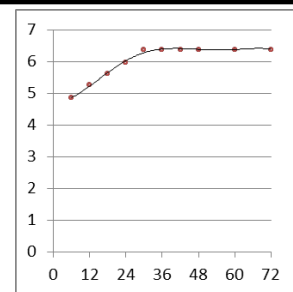

**Table 4.2.2B: Detailed Scenario Operating Characteristics**

|         | Shockable Rhythm  |       |             |                   | Non-Shockable Rhythm |       |             |                   |
|---------|-------------------|-------|-------------|-------------------|----------------------|-------|-------------|-------------------|
|         | Mean Weighted mRS | N     | Pr (Target) | Pr (Target & Eff) | Mean Weighted mRS    | N     | Pr (Target) | Pr (Target & Eff) |
| 6 Hour  | 4.85              | 9.8   | 0.015       | 0.000             | 4.85                 | 9.1   | 0.015       | 0.000             |
| 12 Hour | 5.27              | 96.4  | 0.021       | 0.018             | 5.27                 | 97    | 0.023       | 0.017             |
| 18 Hour | 5.62              | 90.5  | 0.078       | 0.071             | 5.62                 | 90.5  | 0.077       | 0.071             |
| 24 Hour | 5.95              | 150.3 | 0.113       | 0.105             | 5.95                 | 150.5 | 0.127       | 0.119             |
| 30 Hour | 6.38              | 141.8 | 0.286       | 0.273             | 6.38                 | 140.9 | 0.252       | 0.242             |
| 36 Hour | 6.38              | 137.8 | 0.250       | 0.242             | 6.38                 | 137.5 | 0.258       | 0.250             |
| 42 Hour | 6.38              | 116.3 | 0.131       | 0.125             | 6.38                 | 116.8 | 0.144       | 0.138             |
| 48 Hour | 6.38              | 125.4 | 0.080       | 0.076             | 6.38                 | 125.9 | 0.073       | 0.070             |
| 60 Hour | 6.38              | 28.2  | 0.025       | 0.024             | 6.38                 | 28.6  | 0.028       | 0.028             |
| 72 Hour | 6.38              | 3.2   | 0.002       | 0.002             | 6.38                 | 3.5   | 0.004       | 0.004             |

### 4.2.3 U-Shaped Duration Response (Scenario 41.41)

In this scenario, increased cooling duration provides a strong treatment effect, and in contrast to the two scenarios above (Section 4.2.1 and 4.2.2), the duration-response curve is U-shaped. The target duration is 24 hours, the benefit of cooling plateaus between 24 and 36 hours, and then begins to decrease beyond 36 hours. The 6-hour arm is enrolled to with 53% probability. The duration-response model is able to identify the decrease in treatment benefit after 36 hours and as a result the 60-hour arm is enrolled to with only 1% probability and the 72-hour arm was never enrolled to in any of the simulated trials. The trial continues to completion with 98% probability (i.e. will stop early for futility less than 2% of the time).

The 18-, 24-, 30-, and 36-hour arms are considered clinically acceptable and are selected as the target duration with 83% probability. The positive duration response curve is identified with 70% probability.

**Table 4.2.3A: Summary Scenario Operating Characteristics**

|                                       | Shockable | Non-Shockable |
|---------------------------------------|-----------|---------------|
| Pr(Select Acceptable Target Duration) | 0.832     | 0.824         |
| Pr(Positive Duration Response)        | 0.709     | 0.699         |
| Pr(Futility)                          | 0.013     | 0.018         |
| Pr(Open 6 Hours)                      | 0.514     | 0.540         |
| Pr(Open 60 Hours)                     | 0.012     | 0.014         |
| Pr(Open 72 Hours)                     | 0.000     | 0.000         |

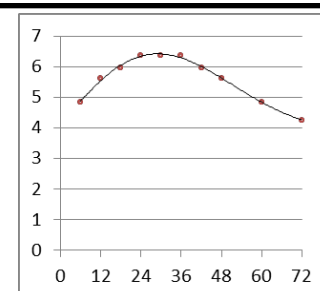

**Table 4.2.3B: Detailed Scenario Operating Characteristics**

|         | Shockable Rhythm  |       |             |                   | Non-Shockable Rhythm |       |             |                   |
|---------|-------------------|-------|-------------|-------------------|----------------------|-------|-------------|-------------------|
|         | Mean Weighted mRS | N     | Pr (Target) | Pr (Target & Eff) | Mean Weighted mRS    | N     | Pr (Target) | Pr (Target & Eff) |
| 6 Hour  | 4.85              | 24.9  | 0.046       | 0.000             | 4.85                 | 26.1  | 0.051       | 0.000             |
| 12 Hour | 5.62              | 157.5 | 0.120       | 0.062             | 5.62                 | 158.2 | 0.122       | 0.062             |
| 18 Hour | 5.95              | 154.6 | 0.249       | 0.187             | 5.95                 | 153.7 | 0.251       | 0.187             |
| 24 Hour | 6.38              | 194.4 | 0.342       | 0.269             | 6.38                 | 192.5 | 0.340       | 0.264             |
| 30 Hour | 6.38              | 132.0 | 0.189       | 0.151             | 6.38                 | 131.4 | 0.183       | 0.148             |
| 36 Hour | 6.38              | 97.1  | 0.052       | 0.038             | 6.38                 | 96.0  | 0.050       | 0.036             |
| 42 Hour | 5.95              | 65.6  | 0.003       | 0.002             | 5.95                 | 65.1  | 0.003       | 0.002             |
| 48 Hour | 5.62              | 75.1  | 0.000       | 0.000             | 5.62                 | 74.8  | 0.000       | 0.000             |
| 60 Hour | 4.85              | 0.4   | 0.000       | 0.000             | 4.85                 | 0.4   | 0.000       | 0.000             |
| 72 Hour | 4.25              | 0.0   | 0.000       | 0.000             | 4.25                 | 0.0   | 0.000       | 0.000             |

#### 4.2.4 Increasing Duration Response (Scenario 42.42)

In this scenario, increased cooling duration has a strong treatment effect and the duration-response curve is increasing across all arms. The optimal duration is 72 hours, though the difference in mean weighted mRS is small between the 60-hour and 72-hour duration arms. The 6-hour duration arm is enrolled to with 32% probability, and the 60-hour arm is enrolled to with 70% probability. The 72-hour arm can only be opened after the 60-hour arm has been opened, and therefore, the 72-hour arm is enrolled to with lower probability, 41% probability. The trial continues to completion with 98% probability (i.e. will stop early for futility less than 2% of the time). The 48-hour arm has the largest mean sample size, the result of additional criteria having to be met before patients can be enrolled to the 60- or 72- hour duration arms. However, the duration-response model is able to identify the increasing shape of the curve. The 72-hour and 60-hour duration arms are both considered clinically acceptable and they are selected as the target duration with 40% probability in each rhythm type. The positive duration response curve is identified with 85% probability.

**Table 4.2.4A: Summary Scenario Operating Characteristics**

|                                       | Shockable | Non-Shockable |
|---------------------------------------|-----------|---------------|
| Pr(Select Acceptable Target Duration) | 0.390     | 0.396         |
| Pr(Positive Duration Response)        | 0.847     | 0.845         |
| Pr(Futility)                          | 0.015     | 0.020         |
| Pr(Open 6 Hours)                      | 0.318     | 0.333         |
| Pr(Open 60 Hours)                     | 0.698     | 0.698         |
| Pr(Open 72 Hours)                     | 0.413     | 0.412         |

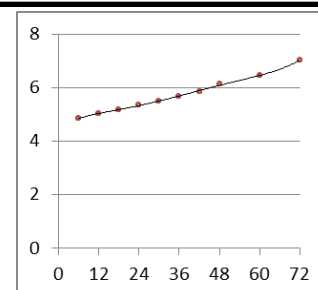

**Table 4.2.4B: Detailed Scenario Operating Characteristics**

|                | Shockable Rhythm  |             |              |                   | Non-Shockable Rhythm |             |              |                   |
|----------------|-------------------|-------------|--------------|-------------------|----------------------|-------------|--------------|-------------------|
|                | Mean Weighted mRS | N           | Pr (Target)  | Pr (Target & Eff) | Mean Weighted mRS    | N           | Pr (Target)  | Pr (Target & Eff) |
| 6 Hour         | 4.85              | 17.6        | 0.048        | 0.000             | 4.85                 | 19.0        | 0.047        | 0.000             |
| 12 Hour        | 5.015             | 113.0       | 0.072        | 0.043             | 5.015                | 113.0       | 0.058        | 0.035             |
| 18 Hour        | 5.18              | 85.3        | 0.051        | 0.039             | 5.18                 | 85.5        | 0.056        | 0.042             |
| 24 Hour        | 5.345             | 121.7       | 0.057        | 0.047             | 5.345                | 121.6       | 0.057        | 0.048             |
| 30 Hour        | 5.51              | 95.0        | 0.060        | 0.053             | 5.51                 | 94.7        | 0.065        | 0.054             |
| 36 Hour        | 5.675             | 103.3       | 0.064        | 0.058             | 5.675                | 102.6       | 0.070        | 0.063             |
| 42 Hour        | 5.84              | 111.5       | 0.087        | 0.074             | 5.84                 | 110.8       | 0.089        | 0.078             |
| 48 Hour        | 6.14              | 150.4       | 0.171        | 0.154             | 6.14                 | 149.5       | 0.162        | 0.142             |
| <b>60 Hour</b> | <b>6.44</b>       | <b>68.1</b> | <b>0.183</b> | <b>0.172</b>      | <b>6.44</b>          | <b>66.4</b> | <b>0.191</b> | <b>0.179</b>      |
| <b>72 Hour</b> | <b>7.04</b>       | <b>35.7</b> | <b>0.207</b> | <b>0.207</b>      | <b>7.04</b>          | <b>35.2</b> | <b>0.205</b> | <b>0.204</b>      |

#### 4.2.5 Large Treatment Effect at 48 Hours (Scenario 53.53)

In this scenario, increased cooling duration has a large treatment effect and the duration-response curve plateaus at 48 hours. The 6-hour arm is enrolled to with 14% probability, the 60-hour arm is enrolled to with 94% probability, and the 72-hour arm is enrolled to with 70% probability. The trial continues to completion with greater than 99% probability (i.e. will stop early for futility less than 1% of the time). The 48-hour arm has the largest mean sample size. In previous scenarios with a plateau duration-response curve, the two arms neighboring the target duration also had the larger sample sizes, but in this scenario, the 60-hour arm has a smaller mean sample size because of the additional criteria that must be satisfied before enrolling patients to that arm.

The 42-, 48-, and 60-hour arms are considered clinically acceptable and they are selected with 77% probability. The positive duration-response curve is identified with 99% probability.

**Table 4.2.5A: Summary Scenario Operating Characteristics**

|                                       | Shockable | Non-Shockable |
|---------------------------------------|-----------|---------------|
| Pr(Select Acceptable Target Duration) | 0.777     | 0.763         |
| Pr(Positive Duration Response)        | 0.994     | 0.993         |
| Pr(Futility)                          | 0.002     | 0.002         |
| Pr(Open 6 Hours)                      | 0.145     | 0.130         |
| Pr(Open 60 Hours)                     | 0.942     | 0.931         |
| Pr(Open 72 Hours)                     | 0.701     | 0.685         |

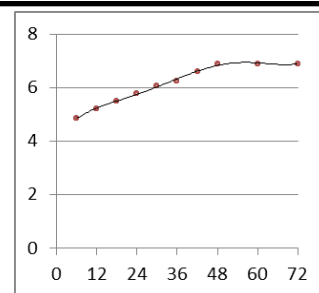

**Table 4.2.5B: Detailed Scenario Operating Characteristics**

|         | Shockable Rhythm  |       |             |                   | Non-Shockable Rhythm |       |             |                   |
|---------|-------------------|-------|-------------|-------------------|----------------------|-------|-------------|-------------------|
|         | Mean Weighted mRS | N     | Pr (Target) | Pr (Target & Eff) | Mean Weighted mRS    | N     | Pr (Target) | Pr (Target & Eff) |
| 6 Hour  | 4.85              | 4.5   | 0.003       | 0.000             | 4.85                 | 4.2   | 0.004       | 0.000             |
| 12 Hour | 5.2               | 70.3  | 0.003       | 0.003             | 5.2                  | 70.0  | 0.001       | 0.001             |
| 18 Hour | 5.51              | 52.2  | 0.022       | 0.022             | 5.51                 | 53.1  | 0.021       | 0.021             |
| 24 Hour | 5.77              | 98.1  | 0.035       | 0.035             | 5.77                 | 99.7  | 0.033       | 0.033             |
| 30 Hour | 6.08              | 83.3  | 0.050       | 0.049             | 6.08                 | 83.9  | 0.051       | 0.050             |
| 36 Hour | 6.24              | 106.1 | 0.066       | 0.066             | 6.24                 | 106.9 | 0.072       | 0.072             |
| 42 Hour | 6.59              | 135.6 | 0.109       | 0.109             | 6.59                 | 135.2 | 0.121       | 0.121             |
| 48 Hour | 6.9               | 196.9 | 0.356       | 0.356             | 6.9                  | 195.7 | 0.332       | 0.331             |
| 60 Hour | 6.9               | 113.1 | 0.312       | 0.311             | 6.9                  | 112.1 | 0.310       | 0.310             |
| 72 Hour | 6.9               | 39.8  | 0.044       | 0.044             | 6.9                  | 39.4  | 0.054       | 0.054             |

#### 4.2.6 Cooling Longer than 6 Hours is Harmful (Scenario 99.99)

In this scenario, increasing cooling duration is associated with a decrease in the mean weighted mRS. The 6-hour arm was enrolled to in more than 99% of simulated trials and the 60- and 72-hour duration arms were enrolled 0.2% or less of the simulated trials. Both rhythm types stop for futility over 96% of the time.

**Table 4.2.6A: Summary Scenario Operating Characteristics**

|                                       | Shockable | Non-Shockable |
|---------------------------------------|-----------|---------------|
| Pr(Select Acceptable Target Duration) | 0.926     | 0.922         |
| Pr(Positive Duration Response)        | 0.000     | 0.000         |
| Pr(Futility)                          | 0.968     | 0.966         |
| Pr(Open 6 Hours)                      | 0.998     | 0.998         |
| Pr(Open 60 Hours)                     | 0.002     | 0.001         |
| Pr(Open 72 Hours)                     | 0.000     | 0.000         |

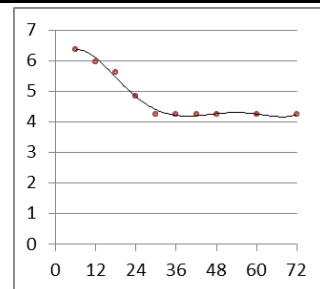

**Table 4.2.6B: Detailed Scenario Operating Characteristics**

|               | Shockable Rhythm  |              |              |                   | Non-Shockable Rhythm |              |              |                   |
|---------------|-------------------|--------------|--------------|-------------------|----------------------|--------------|--------------|-------------------|
|               | Mean Weighted mRS | N            | Pr (Target)  | Pr (Target & Eff) | Mean Weighted mRS    | N            | Pr (Target)  | Pr (Target & Eff) |
| <i>6 Hour</i> | <i>6.38</i>       | <i>112.0</i> | <i>0.926</i> | <i>0.000</i>      | <i>6.38</i>          | <i>112.1</i> | <i>0.922</i> | <i>0.000</i>      |
| 12 Hour       | 5.95              | 198.2        | 0.069        | 0.000             | 5.95                 | 201.9        | 0.077        | 0.000             |
| 18 Hour       | 5.62              | 98.1         | 0.005        | 0.000             | 5.62                 | 99.3         | 0.002        | 0.000             |
| 24 Hour       | 4.85              | 86.2         | 0.000        | 0.000             | 4.85                 | 86.9         | 0.000        | 0.000             |
| 30 Hour       | 4.25              | 38.6         | 0.000        | 0.000             | 4.25                 | 39.4         | 0.000        | 0.000             |
| 36 Hour       | 4.25              | 31.0         | 0.000        | 0.000             | 4.25                 | 31.7         | 0.000        | 0.000             |
| 42 Hour       | 4.25              | 23.3         | 0.000        | 0.000             | 4.25                 | 23.9         | 0.000        | 0.000             |
| 48 Hour       | 4.25              | 48.9         | 0.000        | 0.000             | 4.25                 | 49.4         | 0.000        | 0.000             |
| 60 Hour       | 4.25              | 0.1          | 0.000        | 0.000             | 4.25                 | 0.1          | 0.000        | 0.000             |
| 72 Hour       | 4.25              | 0.0          | 0.000        | 0.000             | 4.25                 | 0.0          | 0.000        | 0.000             |



#### 4.2.7 Treatment Effect at 18 Hours (Scenario 31.31)

In this scenario, increasing cooling duration provides a strong treatment effect and the duration response curve plateaus at 18 hours. The 6-hour arm is enrolled to with 42% probability, the 60-hour arm is enrolled to with 16% probability, and the 72-hour arm is enrolled to with 2% probability. The trial continues to completion with greater than 99% probability (i.e. will stop early for futility less than 1% of the time).

The 24-hour duration, and the two shorter arms, 12- and 18-hours have the largest sample sizes. This allocation aids in identifying the treatment effect plateau. The 18-, 24-, and 30-hour durations are considered clinically acceptable. These arms are selected as the target duration with approximately 80% probability in each rhythm type. The positive duration-response curve is identified with 77% probability.

**Table 4.2.7A: Summary Scenario Operating Characteristics**

|                                       | Shockable | Non-Shockable |
|---------------------------------------|-----------|---------------|
| Pr(Select Acceptable Target Duration) | 0.802     | 0.792         |
| Pr(Positive Duration Response)        | 0.778     | 0.774         |
| Pr(Futility)                          | 0.003     | 0.003         |
| Pr(Open 6 Hours)                      | 0.425     | 0.420         |
| Pr(Open 60 Hours)                     | 0.171     | 0.158         |
| Pr(Open 72 Hours)                     | 0.017     | 0.020         |

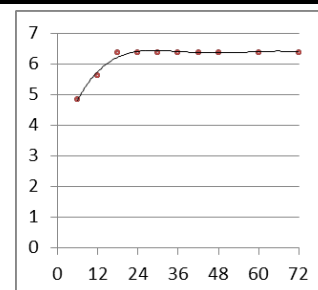

**Table 4.2.7B: Detailed Scenario Operating Characteristics**

|         | Shockable Rhythm  |       |             |                   | Non-Shockable Rhythm |       |             |                   |
|---------|-------------------|-------|-------------|-------------------|----------------------|-------|-------------|-------------------|
|         | Mean Weighted mRS | N     | Pr (Target) | Pr (Target & Eff) | Mean Weighted mRS    | N     | Pr (Target) | Pr (Target & Eff) |
| 6 Hour  | 4.85              | 16.8  | 0.038       | 0.000             | 4.85                 | 16.3  | 0.038       | 0.000             |
| 12 Hour | 5.615             | 133.2 | 0.059       | 0.035             | 5.615                | 132.2 | 0.062       | 0.034             |
| 18 Hour | 6.38              | 170.0 | 0.416       | 0.336             | 6.38                 | 170.8 | 0.406       | 0.333             |
| 24 Hour | 6.38              | 188.0 | 0.306       | 0.256             | 6.38                 | 189.7 | 0.307       | 0.248             |
| 30 Hour | 6.38              | 114.5 | 0.080       | 0.070             | 6.38                 | 114.6 | 0.079       | 0.070             |
| 36 Hour | 6.38              | 92.3  | 0.045       | 0.037             | 6.38                 | 92.3  | 0.049       | 0.042             |
| 42 Hour | 6.38              | 78.6  | 0.030       | 0.026             | 6.38                 | 78.1  | 0.030       | 0.025             |
| 48 Hour | 6.38              | 97.4  | 0.018       | 0.013             | 6.38                 | 96.7  | 0.024       | 0.017             |
| 60 Hour | 6.38              | 9.0   | 0.007       | 0.006             | 6.38                 | 8.4   | 0.005       | 0.004             |
| 72 Hour | 6.38              | 0.4   | 0.000       | 0.000             | 6.38                 | 0.6   | 0.000       | 0.000             |

### 4.3 Duration-response curves are different between the two rhythm types

In these scenarios, the duration response curve for shockable rhythms is as described in section 4.2.2. Therefore, increased cooling duration provides a strong treatment effect and the duration response curve plateaus at 30 hours. We explore combining this scenario with varying scenarios for non-shockable rhythms. Duration response modeling, allocation, and identification of the target duration is separate between the two rhythm types. Therefore, these operating characteristics change for one rhythm type very little based on the duration-response curve in the opposite rhythm type. However, the final inference on whether the duration response curve is positive is based on a hierarchical model across the two rhythm types. The probability that the duration response curve is identified as positive in one rhythm type may be affected by the duration-response curve in the opposite rhythm type.

| Table 4.3 Section Summary | Shockable Rhythm |       |       |                                        | Non-Shockable Rhythm |       |       |
|---------------------------|------------------|-------|-------|----------------------------------------|----------------------|-------|-------|
|                           | SAT              | Pos   | Fut   |                                        | SAT                  | Pos   | Fut   |
| Strong Effect at 30 hours | 0.791            | 0.844 | 0.002 | Small Effect at 18 hours               | 0.650                | 0.730 | 0.024 |
| Strong Effect at 30 hours | 0.785            | 0.864 | 0.004 | U-shaped duration response             | 0.820                | 0.799 | 0.020 |
| Strong Effect at 30 hours | 0.786            | 0.927 | 0.002 | Increasing duration response           | 0.418                | 0.854 | 0.019 |
| Strong Effect at 30 hours | 0.769            | 0.961 | 0.003 | Larger treatment effect at 48 hours    | 0.758                | 0.978 | 0.001 |
| Strong Effect at 30 hours | 0.837            | 0.536 | 0.004 | Cooling longer than 6 hours is harmful | 0.913                | 0.000 | 0.920 |
| Strong Effect at 30 hours | 0.781            | 0.879 | 0.004 | Treatment effect at 18 hours           | 0.797                | 0.852 | 0.006 |

SAT = Pr(Select Acceptable Target Duration)

Pos = Pr(Positive Duration Response)

Fut = Pr(Futility)

#### 4.3.1 Non-Shockable Small Treatment Effect at 18 Hours (Scenario 32.21)

In this scenario, increased cooling duration provides a small treatment effect in the non-shockable rhythm type (as in Section 4.2.1). Therefore, there is borrowing between duration-response curves where one has a strong treatment effect and one has a smaller treatment effect. As compared to section 4.2, in shockable rhythms the probability that the duration response curve is identified as positive is decreased from 94% to 84%. In non-shockable rhythms, the probability that the duration response curve is identified is increased from 55% to 73%.

|                                              | <b>Shockable</b> | <b>Non-Shockable</b> |
|----------------------------------------------|------------------|----------------------|
| <b>Pr(Select Acceptable Target Duration)</b> | <b>0.791</b>     | <b>0.650</b>         |
| Pr(Positive Duration Response)               | 0.844            | 0.730                |
| Pr(Futility)                                 | 0.002            | 0.024                |
| Pr(Open 6 Hours)                             | 0.232            | 0.512                |
| Pr(Open 60 Hours)                            | 0.460            | 0.134                |
| Pr(Open 72 Hours)                            | 0.093            | 0.015                |

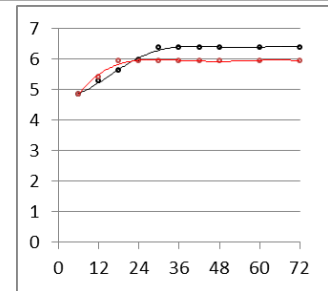

|         | <b>Shockable Rhythm</b>  |              |                    |                              | <b>Non-Shockable Rhythm</b> |              |                    |                              |
|---------|--------------------------|--------------|--------------------|------------------------------|-----------------------------|--------------|--------------------|------------------------------|
|         | <b>Mean Weighted mRS</b> | <b>N</b>     | <b>Pr (Target)</b> | <b>Pr (Target &amp; Eff)</b> | <b>Mean Weighted mRS</b>    | <b>N</b>     | <b>Pr (Target)</b> | <b>Pr (Target &amp; Eff)</b> |
| 6 Hour  | 4.85                     | 8.9          | 0.020              | 0.000                        | 4.85                        | 27.5         | 0.075              | 0.000                        |
| 12 Hour | 5.27                     | 96.4         | 0.019              | 0.008                        | 5.39                        | 155.5        | 0.162              | 0.095                        |
| 18 Hour | 5.62                     | 91.2         | 0.060              | 0.050                        | <b>5.93</b>                 | <b>149.5</b> | <b>0.340</b>       | <b>0.274</b>                 |
| 24 Hour | <b>5.95</b>              | <b>152.2</b> | <b>0.127</b>       | <b>0.109</b>                 | <b>5.93</b>                 | <b>168.2</b> | <b>0.226</b>       | <b>0.190</b>                 |
| 30 Hour | <b>6.38</b>              | <b>144.2</b> | <b>0.288</b>       | <b>0.255</b>                 | <b>5.93</b>                 | <b>109.9</b> | <b>0.084</b>       | <b>0.079</b>                 |
| 36 Hour | <b>6.38</b>              | <b>139.0</b> | <b>0.250</b>       | <b>0.218</b>                 | 5.93                        | 94.3         | 0.046              | 0.040                        |
| 42 Hour | <b>6.38</b>              | <b>117.0</b> | <b>0.126</b>       | <b>0.112</b>                 | 5.93                        | 82.1         | 0.038              | 0.029                        |
| 48 Hour | 6.38                     | 125.3        | 0.088              | 0.072                        | 5.93                        | 100.5        | 0.021              | 0.018                        |
| 60 Hour | 6.38                     | 27.2         | 0.022              | 0.019                        | 5.93                        | 7.2          | 0.007              | 0.004                        |
| 72 Hour | 6.38                     | 3.4          | 0.001              | 0.001                        | 5.93                        | 0.5          | 0.000              | 0.000                        |

### 4.3.2 U-Shaped Duration Response (Scenario 32.41)

In this scenario, in non-shockable rhythms, increased cooling duration provides a strong treatment effect, and the duration response curve is U-shaped (as in Section 4.2.3). As compared to section 4.2 above, in shockable rhythms the probability that the duration response curve is identified as positive is decreased from 94% to 86%. In non-shockable rhythms, the probability that the duration response curve is identified as positive is increased from 70% to 80%.

**Table 4.3.2A: Summary Scenario Operating Characteristics**

|                                       | Shockable | Non-Shockable |
|---------------------------------------|-----------|---------------|
| Pr(Select Acceptable Target Duration) | 0.785     | 0.820         |
| Pr(Positive Duration Response)        | 0.864     | 0.799         |
| Pr(Futility)                          | 0.004     | 0.020         |
| Pr(Open 6 Hours)                      | 0.252     | 0.541         |
| Pr(Open 60 Hours)                     | 0.486     | 0.015         |
| Pr(Open 72 Hours)                     | 0.088     | 0.000         |

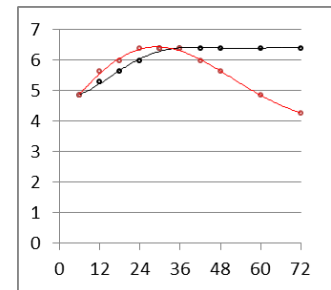

**Table 4.3.2B: Detailed Scenario Operating Characteristics**

|         | Shockable Rhythm  |       |             |                   | Non-Shockable Rhythm |       |             |                   |
|---------|-------------------|-------|-------------|-------------------|----------------------|-------|-------------|-------------------|
|         | Mean Weighted mRS | N     | Pr (Target) | Pr (Target & Eff) | Mean Weighted mRS    | N     | Pr (Target) | Pr (Target & Eff) |
| 6 Hour  | 4.85              | 9.5   | 0.016       | 0.000             | 4.85                 | 25.7  | 0.064       | 0.000             |
| 12 Hour | 5.27              | 97.3  | 0.020       | 0.011             | 5.62                 | 155.4 | 0.116       | 0.084             |
| 18 Hour | 5.62              | 90.6  | 0.067       | 0.054             | 5.95                 | 153.5 | 0.236       | 0.195             |
| 24 Hour | 5.95              | 150.7 | 0.114       | 0.104             | 6.38                 | 193.8 | 0.347       | 0.310             |
| 30 Hour | 6.38              | 143.2 | 0.275       | 0.251             | 6.38                 | 132.1 | 0.182       | 0.158             |
| 36 Hour | 6.38              | 138.8 | 0.266       | 0.242             | 6.38                 | 96.5  | 0.055       | 0.051             |
| 42 Hour | 6.38              | 116.7 | 0.130       | 0.114             | 5.95                 | 65.2  | 0.002       | 0.002             |
| 48 Hour | 6.38              | 125.5 | 0.082       | 0.065             | 5.62                 | 74.5  | 0.000       | 0.000             |
| 60 Hour | 6.38              | 27.6  | 0.027       | 0.021             | 4.85                 | 0.5   | 0.000       | 0.000             |
| 72 Hour | 6.38              | 3.1   | 0.002       | 0.002             | 4.25                 | 0.0   | 0.000       | 0.000             |

### 4.3.3 Increasing Duration Response (Scenario 32.42)

In this scenario, for non-shockable rhythms, increased cooling duration has a strong treatment effect and the duration-response curve is increasing across all arms (as in Section 4.2.4). Operating characteristics are similar as compared to section 4.2 above.

**Table 4.3.3A: Summary Scenario Operating Characteristics**

|                                       | Shockable | Non-Shockable |
|---------------------------------------|-----------|---------------|
| Pr(Select Acceptable Target Duration) | 0.786     | 0.418         |
| Pr(Positive Duration Response)        | 0.927     | 0.854         |
| Pr(Futility)                          | 0.002     | 0.019         |
| Pr(Open 6 Hours)                      | 0.253     | 0.326         |
| Pr(Open 60 Hours)                     | 0.481     | 0.708         |
| Pr(Open 72 Hours)                     | 0.110     | 0.444         |

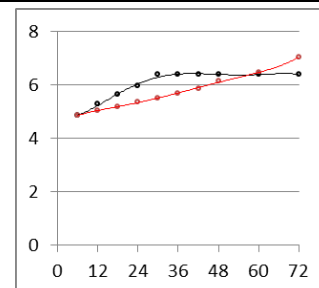

**Table 4.3.3B: Detailed Scenario Operating Characteristics**

|         | Shockable Rhythm  |       |             |                   | Non-Shockable Rhythm |       |             |                   |
|---------|-------------------|-------|-------------|-------------------|----------------------|-------|-------------|-------------------|
|         | Mean Weighted mRS | N     | Pr (Target) | Pr (Target & Eff) | Mean Weighted mRS    | N     | Pr (Target) | Pr (Target & Eff) |
| 6 Hour  | 4.85              | 9.6   | 0.013       | 0.000             | 4.85                 | 17.5  | 0.050       | 0.000             |
| 12 Hour | 5.27              | 96.8  | 0.017       | 0.011             | 5.015                | 109.8 | 0.058       | 0.033             |
| 18 Hour | 5.62              | 91.4  | 0.071       | 0.063             | 5.18                 | 84.4  | 0.059       | 0.052             |
| 24 Hour | 5.95              | 151.6 | 0.130       | 0.120             | 5.345                | 119.9 | 0.055       | 0.048             |
| 30 Hour | 6.38              | 143.1 | 0.274       | 0.259             | 5.51                 | 92.8  | 0.053       | 0.049             |
| 36 Hour | 6.38              | 138.2 | 0.246       | 0.238             | 5.675                | 101.8 | 0.062       | 0.056             |
| 42 Hour | 6.38              | 116.6 | 0.136       | 0.129             | 5.84                 | 110.8 | 0.088       | 0.081             |
| 48 Hour | 6.38              | 126.0 | 0.082       | 0.076             | 6.14                 | 150.4 | 0.156       | 0.136             |
| 60 Hour | 6.38              | 27.9  | 0.031       | 0.030             | 6.44                 | 70.0  | 0.198       | 0.182             |
| 72 Hour | 6.38              | 3.5   | 0.001       | 0.001             | 7.04                 | 37.8  | 0.220       | 0.216             |

#### 4.3.4 Large Treatment Effects at 48 Hours (Scenario 32.53)

In this scenario, for non-shockable rhythms, increased cooling duration has a large treatment effect and the duration-response curve plateaus at 48 hours. In both rhythm types there is a high probabilities that the duration response curve is identified as positive change little as compared to section 4.2 above.

**Table 4.3.4A: Summary Scenario Operating Characteristics**

|                                              | Shockable    | Non-Shockable |
|----------------------------------------------|--------------|---------------|
| <b>Pr(Select Acceptable Target Duration)</b> | <b>0.769</b> | <b>0.758</b>  |
| Pr(Positive Duration Response)               | 0.961        | 0.978         |
| Pr(Futility)                                 | 0.003        | 0.001         |
| Pr(Open 6 Hours)                             | 0.247        | 0.148         |
| Pr(Open 60 Hours)                            | 0.477        | 0.931         |
| Pr(Open 72 Hours)                            | 0.110        | 0.682         |

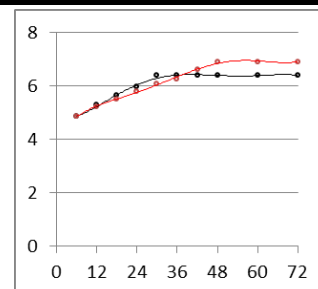

**Table 4.3.4B: Detailed Scenario Operating Characteristics**

|         | Shockable Rhythm  |              |              |                   | Non-Shockable Rhythm |              |              |                   |
|---------|-------------------|--------------|--------------|-------------------|----------------------|--------------|--------------|-------------------|
|         | Mean Weighted mRS | N            | Pr (Target)  | Pr (Target & Eff) | Mean Weighted mRS    | N            | Pr (Target)  | Pr (Target & Eff) |
| 6 Hour  | 4.85              | 9.6          | 0.018        | 0.000             | 4.85                 | 4.6          | 0.003        | 0.000             |
| 12 Hour | 5.27              | 97.2         | 0.021        | 0.018             | 5.2                  | 71.1         | 0.006        | 0.005             |
| 18 Hour | 5.62              | 91.6         | 0.073        | 0.068             | 5.51                 | 53.7         | 0.030        | 0.029             |
| 24 Hour | <b>5.95</b>       | <b>151.6</b> | <b>0.118</b> | <b>0.116</b>      | 5.77                 | 99.9         | 0.039        | 0.037             |
| 30 Hour | <b>6.38</b>       | <b>142.0</b> | <b>0.287</b> | <b>0.283</b>      | 6.08                 | 84.8         | 0.054        | 0.054             |
| 36 Hour | <b>6.38</b>       | <b>136.9</b> | <b>0.246</b> | <b>0.242</b>      | 6.24                 | 107.2        | 0.058        | 0.057             |
| 42 Hour | <b>6.38</b>       | <b>115.1</b> | <b>0.118</b> | <b>0.114</b>      | <b>6.59</b>          | <b>135.0</b> | <b>0.104</b> | <b>0.101</b>      |
| 48 Hour | 6.38              | 125.0        | 0.089        | 0.089             | <b>6.90</b>          | <b>193.9</b> | <b>0.346</b> | <b>0.342</b>      |
| 60 Hour | 6.38              | 28.2         | 0.029        | 0.029             | <b>6.90</b>          | <b>110.4</b> | <b>0.308</b> | <b>0.303</b>      |
| 72 Hour | 6.38              | 3.5          | 0.002        | 0.002             | 6.90                 | 38.8         | 0.051        | 0.050             |

#### 4.3.5 Cooling Past 6 Hours in Harmful (Scenario 32.99)

In this scenario, increasing cooling duration results in decreasing weighted mean mRS in non-shockable rhythms. The trial stops for futility with 92% probability in non-shockable rhythms. The poor performance of additional cooling in non-shockable rhythms creates a stark interaction between duration and efficacy. This lowers the probability of determining that the duration-response is positive in shockable rhythms to 54% from 94% in the case when both arms have the same profile as the shockable rhythms.

**Table 4.3.5A: Summary Scenario Operating Characteristics**

|                                       | Shockable | Non-Shockable |
|---------------------------------------|-----------|---------------|
| Pr(Select Acceptable Target Duration) | 0.837     | 0.913         |
| Pr(Positive Duration Response)        | 0.536     | 0.000         |
| Pr(Futility)                          | 0.004     | 0.920         |
| Pr(Open 6 Hours)                      | 0.260     | 0.998         |
| Pr(Open 60 Hours)                     | 0.496     | 0.002         |
| Pr(Open 72 Hours)                     | 0.109     | 0.000         |

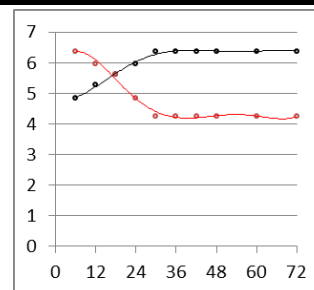

**Table 4.3.5B: Detailed Scenario Operating Characteristics**

|         | Shockable Rhythm  |       |             |                   | Non-Shockable Rhythm |       |             |                   |
|---------|-------------------|-------|-------------|-------------------|----------------------|-------|-------------|-------------------|
|         | Mean Weighted mRS | N     | Pr (Target) | Pr (Target & Eff) | Mean Weighted mRS    | N     | Pr (Target) | Pr (Target & Eff) |
| 6 Hour  | 4.85              | 12.2  | 0.006       | 0.000             | 6.38                 | 97.6  | 0.913       | 0.000             |
| 12 Hour | 5.27              | 106.2 | 0.008       | 0.001             | 5.95                 | 185.8 | 0.085       | 0.000             |
| 18 Hour | 5.62              | 113.4 | 0.048       | 0.017             | 5.62                 | 91.4  | 0.002       | 0.000             |
| 24 Hour | 5.95              | 191.7 | 0.114       | 0.066             | 4.85                 | 84.1  | 0.000       | 0.000             |
| 30 Hour | 6.38              | 207.7 | 0.306       | 0.169             | 4.25                 | 37.8  | 0.000       | 0.000             |
| 36 Hour | 6.38              | 201.1 | 0.292       | 0.170             | 4.25                 | 30.5  | 0.000       | 0.000             |
| 42 Hour | 6.38              | 161.6 | 0.125       | 0.061             | 4.25                 | 23.0  | 0.000       | 0.000             |
| 48 Hour | 6.38              | 158.5 | 0.074       | 0.034             | 4.25                 | 48.9  | 0.000       | 0.000             |
| 60 Hour | 6.38              | 41.0  | 0.025       | 0.016             | 4.25                 | 0.1   | 0.000       | 0.000             |
| 72 Hour | 6.38              | 5.6   | 0.002       | 0.002             | 4.25                 | 0.0   | 0.000       | 0.000             |

#### 4.3.6 Treatment Effect at 18 Hours (Scenario 32.31)

In this scenario, for non-shockable rhythms, the duration-response curve plateaus at 18 hours, while it plateaus as 30 hours for shockable rhythms. The operating characteristics for each scenario are similar to when the effects are the same in each groups – showing that small deviations in effect across durations for the 2 rhythm types does not have a detrimental effect.

**Table 4.3.6A: Summary Scenario Operating Characteristics**

|                                       | Shockable | Non-Shockable |
|---------------------------------------|-----------|---------------|
| Pr(Select Acceptable Target Duration) | 0.781     | 0.797         |
| Pr(Positive Duration Response)        | 0.879     | 0.852         |
| Pr(Futility)                          | 0.004     | 0.006         |
| Pr(Open 6 Hours)                      | 0.264     | 0.404         |
| Pr(Open 60 Hours)                     | 0.466     | 0.155         |
| Pr(Open 72 Hours)                     | 0.090     | 0.020         |

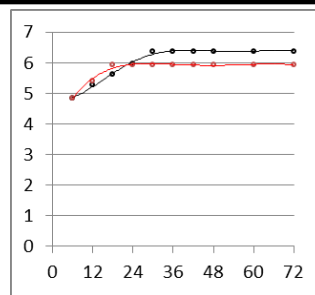

**Table 4.3.6B: Detailed Scenario Operating Characteristics**

|         | Shockable Rhythm  |       |             |                   | Non-Shockable Rhythm |       |             |                   |
|---------|-------------------|-------|-------------|-------------------|----------------------|-------|-------------|-------------------|
|         | Mean Weighted mRS | N     | Pr (Target) | Pr (Target & Eff) | Mean Weighted mRS    | N     | Pr (Target) | Pr (Target & Eff) |
| 6 Hour  | 4.85              | 10.0  | 0.018       | 0.000             | 4.85                 | 16.3  | 0.036       | 0.000             |
| 12 Hour | 5.27              | 97.8  | 0.023       | 0.012             | 5.39                 | 133.5 | 0.068       | 0.050             |
| 18 Hour | 5.62              | 92.8  | 0.070       | 0.061             | 5.93                 | 170.0 | 0.423       | 0.371             |
| 24 Hour | 5.95              | 151.7 | 0.124       | 0.106             | 5.93                 | 186.7 | 0.284       | 0.255             |
| 30 Hour | 6.38              | 142.2 | 0.271       | 0.252             | 5.93                 | 114.2 | 0.090       | 0.084             |
| 36 Hour | 6.38              | 137.4 | 0.254       | 0.237             | 5.93                 | 93.2  | 0.043       | 0.040             |
| 42 Hour | 6.38              | 115.1 | 0.132       | 0.120             | 5.93                 | 79.2  | 0.030       | 0.029             |
| 48 Hour | 6.38              | 124.5 | 0.082       | 0.071             | 5.93                 | 97.1  | 0.022       | 0.020             |
| 60 Hour | 6.38              | 26.8  | 0.023       | 0.018             | 5.93                 | 8.0   | 0.004       | 0.003             |
| 72 Hour | 6.38              | 3.0   | 0.002       | 0.002             | 5.93                 | 0.6   | 0.000       | 0.000             |



#### 4.4 Sensitivity Analysis on Proportion of Patients in Each Rhythm Type

In this section, we present a sensitivity analysis on the proportion of patients in each rhythm type. Section 4.2 and 4.3 assumed 50% of patients in each rhythm type. In this section, we assume 75% of patients will have shockable rhythms. In general, the mean sample size is increased in shockable rhythms and correspondingly, the probabilities of success increase. The mean sample size in non-shockable rhythms is decreased and correspondingly the probabilities of success decrease. Results are generalizable to the converse – assuming 75% of patients will have non-shockable rhythm.

|                                     | Shockable                           |                            |          | Non-Shockable                       |                            |          |
|-------------------------------------|-------------------------------------|----------------------------|----------|-------------------------------------|----------------------------|----------|
|                                     | Selected Acceptable Target Duration | Positive Duration Response | Futility | Selected Acceptable Target Duration | Positive Duration Response | Futility |
| Small Effect at 18 hours            | 0.730                               | 0.592                      | 0.034    | 0.520                               | 0.402                      | 0.002    |
| Strong Effect at 30 hours           | 0.839                               | 0.951                      | 0.004    | 0.678                               | 0.852                      | 0.001    |
| U-shaped duration response          | 0.891                               | 0.746                      | 0.025    | 0.660                               | 0.545                      | 0.003    |
| Increasing duration response        | 0.607                               | 0.899                      | 0.016    | 0.139                               | 0.768                      | 0.001    |
| Larger treatment effect at 48 hours | 0.789                               | 0.997                      | 0.001    | 0.644                               | 0.956                      | 0.001    |
| Cooling > 6 hours is harmful        | 0.921                               | 0.000                      | 0.992    | 0.921                               | 0.000                      | 0.892    |
| Treatment effect at 18 hours        | 0.843                               | 0.791                      | 0.010    | 0.666                               | 0.624                      | 0.002    |

#### 4.4.1 Small Treatment Effect at 18 Hours (Scenario 21.21)

As compared to Section 4.2.1, the mean sample size in shockable rhythms increases from 900 to 1335. The probability that a clinically acceptable duration is selected increases from 64% to 73%. The probability of identifying the positive duration response curve increases from 56% to 59%. In non-shockable rhythms, the mean sample size decreases from 900 to 465. The probability that a clinically acceptable duration is selected decreases from 64% to 52% due to the smaller sample size.

**Table 4.4.1A: Summary Scenario Operating Characteristics**

|                                       | Shockable | Non-Shockable |
|---------------------------------------|-----------|---------------|
| Pr(Select Acceptable Target Duration) | 0.730     | 0.520         |
| Pr(Positive Duration Response)        | 0.592     | 0.402         |
| Pr(Futility)                          | 0.034     | 0.002         |
| Pr(Open 6 Hours)                      | 0.530     | 0.438         |
| Pr(Open 60 Hours)                     | 0.167     | 0.099         |
| Pr(Open 72 Hours)                     | 0.015     | 0.007         |

**Table 4.4.1B: Detailed Scenario Operating Characteristics**

|                | Shockable Rhythm  |              |              |                   | Non-Shockable Rhythm |             |              |                   |
|----------------|-------------------|--------------|--------------|-------------------|----------------------|-------------|--------------|-------------------|
|                | Mean Weighted mRS | N            | Pr (Target)  | Pr (Target & Eff) | Mean Weighted mRS    | N           | Pr (Target)  | Pr (Target & Eff) |
| 6 Hour         | 4.85              | 36.7         | 0.058        | 0.000             | 4.85                 | 12.9        | 0.146        | 0.000             |
| 12 Hour        | 5.39              | 216.6        | 0.104        | 0.042             | 5.39                 | 86.3        | 0.230        | 0.064             |
| <i>18 Hour</i> | <i>5.93</i>       | <i>238.9</i> | <i>0.390</i> | <i>0.247</i>      | <i>5.93</i>          | <i>74.8</i> | <i>0.289</i> | <i>0.142</i>      |
| <i>24 Hour</i> | <i>5.93</i>       | <i>261.7</i> | <i>0.252</i> | <i>0.170</i>      | <i>5.93</i>          | <i>84.1</i> | <i>0.168</i> | <i>0.097</i>      |
| <i>30 Hour</i> | <i>5.93</i>       | <i>164.4</i> | <i>0.088</i> | <i>0.060</i>      | <i>5.93</i>          | <i>57.0</i> | <i>0.063</i> | <i>0.041</i>      |
| 36 Hour        | 5.93              | 137.2        | 0.039        | 0.029             | 5.93                 | 50.2        | 0.043        | 0.026             |
| 42 Hour        | 5.93              | 118.9        | 0.032        | 0.020             | 5.93                 | 44.2        | 0.037        | 0.022             |
| 48 Hour        | 5.93              | 147.5        | 0.030        | 0.019             | 5.93                 | 52.6        | 0.021        | 0.009             |
| 60 Hour        | 5.93              | 12.5         | 0.008        | 0.005             | 5.93                 | 2.7         | 0.002        | 0.000             |
| 72 Hour        | 5.93              | 0.7          | 0.000        | 0.000             | 5.93                 | 0.1         | 0.000        | 0.000             |

#### 4.4.2 Strong Treatment Effects at 30 Hours (Scenario 32.32)

As compared to section 4.2.2, the mean sample size in shockable rhythms increases from 900 to 1350 while the probability a clinically acceptable duration is selected increases from approximately 78% to 84%. In total, the probability of identifying the positive duration response curve was already high, 94%, under the assumption of equal proportions in each rhythm type so the increase in sample size changes this little, to 95%. In non-shockable rhythms, the mean sample size decreases from 900 to 451 and the probability of selecting a clinically acceptable duration decreases from approximately 78% to 68%. The probability of identifying the positive duration-response decreases from 94% to 85%.

**Table 4.4.2A: Summary Scenario Operating Characteristics**

|                                       | Shockable | Non-Shockable |
|---------------------------------------|-----------|---------------|
| Pr(Select Acceptable Target Duration) | 0.839     | 0.678         |
| Pr(Positive Duration Response)        | 0.951     | 0.852         |
| Pr(Futility)                          | 0.004     | 0.001         |
| Pr(Open 6 Hours)                      | 0.209     | 0.258         |
| Pr(Open 60 Hours)                     | 0.536     | 0.330         |
| Pr(Open 72 Hours)                     | 0.122     | 0.052         |

**Table 4.4.2B: Detailed Scenario Operating Characteristics**

|         | Shockable Rhythm  |       |             |                   | Non-Shockable Rhythm |      |             |                   |
|---------|-------------------|-------|-------------|-------------------|----------------------|------|-------------|-------------------|
|         | Mean Weighted mRS | N     | Pr (Target) | Pr (Target & Eff) | Mean Weighted mRS    | N    | Pr (Target) | Pr (Target & Eff) |
| 6 Hour  | 4.85              | 9.5   | 0.006       | 0.000             | 4.85                 | 5.8  | 0.061       | 0.000             |
| 12 Hour | 5.27              | 120.5 | 0.007       | 0.005             | 5.27                 | 62.6 | 0.070       | 0.048             |
| 18 Hour | 5.62              | 117.9 | 0.051       | 0.046             | 5.62                 | 53.9 | 0.103       | 0.086             |
| 24 Hour | 5.95              | 219.2 | 0.096       | 0.090             | 5.95                 | 77.1 | 0.128       | 0.117             |
| 30 Hour | 6.38              | 229.8 | 0.302       | 0.290             | 6.38                 | 64.7 | 0.220       | 0.204             |
| 36 Hour | 6.38              | 225.8 | 0.309       | 0.300             | 6.38                 | 61.9 | 0.198       | 0.190             |
| 42 Hour | 6.38              | 181.8 | 0.132       | 0.126             | 6.38                 | 54.5 | 0.132       | 0.123             |
| 48 Hour | 6.38              | 188.6 | 0.061       | 0.059             | 6.38                 | 61.0 | 0.074       | 0.070             |
| 60 Hour | 6.38              | 48.4  | 0.030       | 0.029             | 6.38                 | 9.2  | 0.014       | 0.012             |
| 72 Hour | 6.38              | 6.9   | 0.006       | 0.006             | 6.38                 | 0.8  | 0.000       | 0.000             |

#### 4.4.3 U-Shaped Duration Response (Scenario 41.41)

As compared to section 4.2.3, the mean sample size in shockable rhythms increases from 900 to 1340 and the probability of selecting a clinically acceptable duration increases from 83% to 89% and the probability of identifying the positive duration response increases from 71% to 75%. In non-shockable rhythms, the mean sample size decreases from 900 to 460. The probability that a clinically acceptable duration is selected decreases from 82% to 66% and the probability of identifying a positive duration response decreases from 70% to 55%.

**Table 4.4.3A: Summary Scenario Operating Characteristics**

|                                       | Shockable | Non-Shockable |
|---------------------------------------|-----------|---------------|
| Pr(Select Acceptable Target Duration) | 0.891     | 0.660         |
| Pr(Positive Duration Response)        | 0.746     | 0.545         |
| Pr(Futility)                          | 0.025     | 0.003         |
| Pr(Open 6 Hours)                      | 0.541     | 0.442         |
| Pr(Open 60 Hours)                     | 0.013     | 0.024         |
| Pr(Open 72 Hours)                     | 0.000     | 0.000         |

**Table 4.4.3B: Detailed Scenario Operating Characteristics**

|         | Shockable Rhythm  |       |             |                   | Non-Shockable Rhythm |      |             |                   |
|---------|-------------------|-------|-------------|-------------------|----------------------|------|-------------|-------------------|
|         | Mean Weighted mRS | N     | Pr (Target) | Pr (Target & Eff) | Mean Weighted mRS    | N    | Pr (Target) | Pr (Target & Eff) |
| 6 Hour  | 4.85              | 32.8  | 0.028       | 0.000             | 4.85                 | 12.4 | 0.110       | 0.000             |
| 12 Hour | 5.62              | 216.0 | 0.080       | 0.045             | 5.62                 | 87.2 | 0.222       | 0.086             |
| 18 Hour | 5.95              | 231.6 | 0.221       | 0.163             | 5.95                 | 75.0 | 0.233       | 0.143             |
| 24 Hour | 6.38              | 311.5 | 0.387       | 0.309             | 6.38                 | 90.9 | 0.242       | 0.180             |
| 30 Hour | 6.38              | 211.3 | 0.237       | 0.193             | 6.38                 | 63.0 | 0.139       | 0.103             |
| 36 Hour | 6.38              | 144.2 | 0.046       | 0.035             | 6.38                 | 50.0 | 0.046       | 0.030             |
| 42 Hour | 5.95              | 90.1  | 0.001       | 0.001             | 5.95                 | 37.8 | 0.006       | 0.003             |
| 48 Hour | 5.62              | 102.0 | 0.000       | 0.000             | 5.62                 | 43.2 | 0.001       | 0.000             |
| 60 Hour | 4.85              | 0.5   | 0.000       | 0.000             | 4.85                 | 0.4  | 0.000       | 0.000             |
| 72 Hour | 4.25              | 0.0   | 0.000       | 0.000             | 4.25                 | 0.0  | 0.000       | 0.000             |

#### 4.4.4 Increasing Duration Response (Scenario 42.42)

As compared to section 4.2.4, the mean sample size in shockable rhythms decreases from 900 to 1343. The probability that a clinically acceptable duration is selected is increased from 39% to 61% and the probability of identifying a positive duration-response increases from 85% to 90%. In non-shockable rhythms, the mean sample size decreases from 900 to 457. The probability a clinically acceptable duration is selected is decreased from 40% to 14% and the probability of identifying a positive duration response decreases from 85% to 77%.

**Table 4.4.4A: Summary Scenario Operating Characteristics**

|                                       | Shockable | Non-Shockable |
|---------------------------------------|-----------|---------------|
| Pr(Select Acceptable Target Duration) | 0.607     | 0.139         |
| Pr(Positive Duration Response)        | 0.899     | 0.768         |
| Pr(Futility)                          | 0.016     | 0.001         |
| Pr(Open 6 Hours)                      | 0.284     | 0.321         |
| Pr(Open 60 Hours)                     | 0.817     | 0.425         |
| Pr(Open 72 Hours)                     | 0.622     | 0.166         |

**Table 4.4.4B: Detailed Scenario Operating Characteristics**

|         | Shockable Rhythm  |       |             |                   | Non-Shockable Rhythm |      |             |                   |
|---------|-------------------|-------|-------------|-------------------|----------------------|------|-------------|-------------------|
|         | Mean Weighted mRS | N     | Pr (Target) | Pr (Target & Eff) | Mean Weighted mRS    | N    | Pr (Target) | Pr (Target & Eff) |
| 6 Hour  | 4.85              | 19.8  | 0.020       | 0.000             | 4.85                 | 9.5  | 0.107       | 0.000             |
| 12 Hour | 5.015             | 142.1 | 0.029       | 0.016             | 5.015                | 70.5 | 0.145       | 0.096             |
| 18 Hour | 5.18              | 107.2 | 0.039       | 0.032             | 5.18                 | 54.4 | 0.097       | 0.076             |
| 24 Hour | 5.345             | 163.7 | 0.036       | 0.031             | 5.345                | 70.3 | 0.099       | 0.084             |
| 30 Hour | 5.51              | 125.4 | 0.049       | 0.042             | 5.51                 | 53.7 | 0.086       | 0.077             |
| 36 Hour | 5.675             | 141.4 | 0.047       | 0.042             | 5.675                | 54.4 | 0.071       | 0.067             |
| 42 Hour | 5.84              | 159.5 | 0.055       | 0.044             | 5.84                 | 54.5 | 0.100       | 0.092             |
| 48 Hour | 6.14              | 229.8 | 0.118       | 0.101             | 6.14                 | 67.9 | 0.157       | 0.142             |
| 60 Hour | 6.44              | 139.6 | 0.171       | 0.156             | 6.44                 | 16.8 | 0.102       | 0.096             |
| 72 Hour | 7.04              | 114.8 | 0.436       | 0.433             | 7.04                 | 4.8  | 0.037       | 0.037             |

#### 4.4.5 Large Treatment Effect at 48 Hours (Scenario 53.53)

As compared to section 4.2.5, the mean sample size in shockable rhythms increases from 900 to 1350. Power for this scenario was already quite good so the increase in sample size has little effect. In non-shockable rhythms, the mean sample size in non-shockable rhythms decreases from 900 to 450. The probability a clinically acceptable duration is selected is decreased from 76% to 64% and the probability of identifying the positive duration-response decreases slightly from over 99% to 96%.

**Table 4.4.5A: Summary Scenario Operating Characteristics**

|                                       | Shockable | Non-Shockable |
|---------------------------------------|-----------|---------------|
| Pr(Select Acceptable Target Duration) | 0.789     | 0.644         |
| Pr(Positive Duration Response)        | 0.997     | 0.956         |
| Pr(Futility)                          | 0.001     | 0.001         |
| Pr(Open 6 Hours)                      | 0.097     | 0.169         |
| Pr(Open 60 Hours)                     | 0.975     | 0.752         |
| Pr(Open 72 Hours)                     | 0.849     | 0.359         |

**Table 4.4.5B: Detailed Scenario Operating Characteristics**

|         | Shockable Rhythm  |       |             |                   | Non-Shockable Rhythm |      |             |                   |
|---------|-------------------|-------|-------------|-------------------|----------------------|------|-------------|-------------------|
|         | Mean Weighted mRS | N     | Pr (Target) | Pr (Target & Eff) | Mean Weighted mRS    | N    | Pr (Target) | Pr (Target & Eff) |
| 6 Hour  | 4.85              | 3.8   | 0.001       | 0.000             | 4.85                 | 3.3  | 0.024       | 0.000             |
| 12 Hour | 5.2               | 83.7  | 0.001       | 0.000             | 5.2                  | 49.9 | 0.027       | 0.023             |
| 18 Hour | 5.51              | 58.3  | 0.020       | 0.020             | 5.51                 | 39.9 | 0.045       | 0.044             |
| 24 Hour | 5.77              | 124.3 | 0.037       | 0.037             | 5.77                 | 62.3 | 0.064       | 0.062             |
| 30 Hour | 6.08              | 100.6 | 0.032       | 0.032             | 6.08                 | 51.4 | 0.080       | 0.079             |
| 36 Hour | 6.24              | 143.2 | 0.035       | 0.035             | 6.24                 | 57.6 | 0.103       | 0.102             |
| 42 Hour | 6.59              | 202.3 | 0.080       | 0.079             | 6.59                 | 64.0 | 0.152       | 0.150             |
| 48 Hour | 6.9               | 325.8 | 0.348       | 0.347             | 6.9                  | 82.2 | 0.320       | 0.316             |
| 60 Hour | 6.9               | 219.0 | 0.361       | 0.361             | 6.9                  | 32.3 | 0.172       | 0.170             |
| 72 Hour | 6.9               | 88.3  | 0.086       | 0.086             | 6.9                  | 7.6  | 0.012       | 0.011             |

#### 4.4.6 Cooling More Than 6 Hours is Harmful (Scenario 99.99)

In this scenario, the increased proportion of patients in shockable rhythms matters little. The trial stops early for futility with high probability and the mean total sample size increases only slightly in each rhythm type.

**Table 4.4.6A: Summary Scenario Operating Characteristics**

|                                       | Shockable | Non-Shockable |
|---------------------------------------|-----------|---------------|
| Pr(Select Acceptable Target Duration) | 0.921     | 0.921         |
| Pr(Positive Duration Response)        | 0.000     | 0.000         |
| Pr(Futility)                          | 0.992     | 0.892         |
| Pr(Open 6 Hours)                      | 1.000     | 0.989         |
| Pr(Open 60 Hours)                     | 0.000     | 0.001         |
| Pr(Open 72 Hours)                     | 0.000     | 0.000         |

**Table 4.4.6B: Detailed Scenario Operating Characteristics**

|               | Shockable Rhythm  |              |              |                   | Non-Shockable Rhythm |              |              |                   |
|---------------|-------------------|--------------|--------------|-------------------|----------------------|--------------|--------------|-------------------|
|               | Mean Weighted mRS | N            | Pr (Target)  | Pr (Target & Eff) | Mean Weighted mRS    | N            | Pr (Target)  | Pr (Target & Eff) |
| <i>6 Hour</i> | <i>6.38</i>       | <i>112.2</i> | <i>0.921</i> | <i>0.000</i>      | <i>6.38</i>          | <i>118.1</i> | <i>0.921</i> | <i>0.000</i>      |
| 12 Hour       | 5.95              | 230.7        | 0.075        | 0.000             | 5.95                 | 209.4        | 0.077        | 0.000             |
| 18 Hour       | 5.62              | 102.7        | 0.004        | 0.000             | 5.62                 | 115.2        | 0.002        | 0.000             |
| 24 Hour       | 4.85              | 102.1        | 0.000        | 0.000             | 4.85                 | 80.3         | 0.000        | 0.000             |
| 30 Hour       | 4.25              | 38.2         | 0.000        | 0.000             | 4.25                 | 45.1         | 0.000        | 0.000             |
| 36 Hour       | 4.25              | 30.6         | 0.000        | 0.000             | 4.25                 | 36.3         | 0.000        | 0.000             |
| 42 Hour       | 4.25              | 22.5         | 0.000        | 0.000             | 4.25                 | 28.0         | 0.000        | 0.000             |
| 48 Hour       | 4.25              | 64.1         | 0.000        | 0.000             | 4.25                 | 37.0         | 0.000        | 0.000             |
| 60 Hour       | 4.25              | 0.0          | 0.000        | 0.000             | 4.25                 | 0.0          | 0.000        | 0.000             |
| 72 Hour       | 4.25              | 0.0          | 0.000        | 0.000             | 4.25                 | 0.0          | 0.000        | 0.000             |

#### 4.4.7 Treatment Effect at 18 Hours (31.31)

As compared to section 4.2.7, the mean sample size in shockable rhythms increases from 900 to 1345. The probability a clinically acceptable duration is selected increases from approximately 80% to 84% the probability of identifying the positive duration-response curve increases from 78% to only 79%. In non-shockable rhythms, the mean sample size decreases from 900 to 454. The probability of selecting a clinically acceptable duration decreases from approximately 79% to 67% and the probability of identifying the positive duration response curve decreases from 77% to 62%.

**Table 4.4.7A: Summary Scenario Operating Characteristics**

|                                       | Shockable | Non-Shockable |
|---------------------------------------|-----------|---------------|
| Pr(Select Acceptable Target Duration) | 0.843     | 0.666         |
| Pr(Positive Duration Response)        | 0.791     | 0.624         |
| Pr(Futility)                          | 0.010     | 0.002         |
| Pr(Open 6 Hours)                      | 0.404     | 0.390         |
| Pr(Open 60 Hours)                     | 0.188     | 0.125         |
| Pr(Open 72 Hours)                     | 0.026     | 0.012         |

**Table 4.4.7B: Detailed Scenario Operating Characteristics**

|         | Shockable Rhythm  |       |             |                   | Non-Shockable Rhythm |      |             |                   |
|---------|-------------------|-------|-------------|-------------------|----------------------|------|-------------|-------------------|
|         | Mean Weighted mRS | N     | Pr (Target) | Pr (Target & Eff) | Mean Weighted mRS    | N    | Pr (Target) | Pr (Target & Eff) |
| 6 Hour  | 4.85              | 20.0  | 0.025       | 0.000             | 4.85                 | 9.8  | 0.074       | 0.000             |
| 12 Hour | 5.615             | 178.2 | 0.036       | 0.023             | 5.615                | 77.3 | 0.150       | 0.060             |
| 18 Hour | 6.38              | 276.8 | 0.442       | 0.360             | 6.38                 | 76.1 | 0.349       | 0.244             |
| 24 Hour | 6.38              | 297.2 | 0.321       | 0.261             | 6.38                 | 86.9 | 0.239       | 0.178             |
| 30 Hour | 6.38              | 171.1 | 0.080       | 0.067             | 6.38                 | 57.3 | 0.078       | 0.061             |
| 36 Hour | 6.38              | 133.9 | 0.042       | 0.036             | 6.38                 | 49.4 | 0.046       | 0.036             |
| 42 Hour | 6.38              | 111.8 | 0.024       | 0.021             | 6.38                 | 43.1 | 0.037       | 0.028             |
| 48 Hour | 6.38              | 139.7 | 0.021       | 0.017             | 6.38                 | 51.5 | 0.022       | 0.013             |
| 60 Hour | 6.38              | 15.0  | 0.007       | 0.006             | 6.38                 | 3.4  | 0.006       | 0.003             |
| 72 Hour | 6.38              | 1.4   | 0.001       | 0.001             | 6.38                 | 0.2  | 0.000       | 0.000             |



#### **4.5 Varying the Proportion of Patients in Each Rhythm Type and the Effect Size in Each Rhythm Type**

In this section, we present a sensitivity analysis, varying the proportion of patients and the effect of cooling in each rhythm type. Sections 4.3 and 4.4 vary each of these separately, this section varies each simultaneously. In this section, we vary the rate of patients with shockable rhythms from 10%, 30%, 50%, 70%, and 90%. We pair the strong effect at 30 hours for shockable rhythms with varying effects for the non-shockable rhythm types.

We first present an overall summary of these simulations, then present each scenario separately with the full operating characteristics. We assume the default accrual rate for each scenario in this section. A total of 2500 simulations were conducted per scenario. Table 4.5 presents the probability of an acceptable target duration being selected and the probability of a positive duration response for each rhythm type. The mean sample sizes for each rhythm type are also summarized.

**Table 4.5:** The summary operating characteristics for various combinations of different treatment effects and enrollment proportions. The # column refers to the labeling of each scenario for the back-up software output. The % for each row presents the proportion of patient enrolled from each rhythm type. The Name column refers to the scenario name presented throughout Section 4. The operating characteristics presented for each rhythm type are N: The mean sample size; SAP: The proportion of times selecting an acceptable target (SAT) dose; and Pos: The proportion of trials a statistically significant positive trend is determined.

| Shockable |    |           |        |      |      | Non-Shockable |    |      |        |      |      |
|-----------|----|-----------|--------|------|------|---------------|----|------|--------|------|------|
| #         | %  | Name      | N      | SAT  | Pos  | #             | %  | Name | N      | SAT  | Pos  |
| 32        | 10 | Strong 30 | 354.1  | .606 | .306 | 1             | 90 | Null | 1445.9 | .913 | .104 |
| 32        | 30 | Strong 30 | 646.1  | .744 | .550 | 1             | 70 | Null | 1153.4 | .903 | .202 |
| 32        | 50 | Strong 30 | 941.7  | .824 | .748 | 1             | 50 | Null | 858.1  | .889 | .259 |
| 32        | 70 | Strong 30 | 1246.1 | .850 | .827 | 1             | 30 | Null | 535.5  | .872 | .295 |
| 32        | 90 | Strong 30 | 1617.9 | .866 | .914 | 1             | 10 | Null | 181.7  | .859 | .334 |

| Shockable |    |           |        |      |      | Non-Shockable |    |          |        |      |      |
|-----------|----|-----------|--------|------|------|---------------|----|----------|--------|------|------|
| #         | %  | Name      | N      | SAT  | Pos  | #             | %  | Name     | N      | SAT  | Pos  |
| 32        | 10 | Strong 30 | 201.5  | .544 | .442 | 2             | 90 | Small 18 | 1598.5 | .771 | .672 |
| 32        | 30 | Strong 30 | 551.1  | .737 | .715 | 2             | 70 | Small 18 | 1248.8 | .730 | .742 |
| 32        | 50 | Strong 30 | 904.2  | .816 | .844 | 2             | 50 | Small 18 | 895.8  | .671 | .733 |
| 32        | 70 | Strong 30 | 1260.2 | .845 | .903 | 2             | 30 | Small 18 | 539.8  | .567 | .672 |
| 32        | 90 | Strong 30 | 1617.6 | .858 | 0.92 | 2             | 10 | Small 18 | 182.4  | .428 | .542 |

| Shockable |    |           |        |      |      | Non-Shockable |    |          |        |      |      |
|-----------|----|-----------|--------|------|------|---------------|----|----------|--------|------|------|
| #         | %  | Name      | N      | SAT  | Pos  | #             | %  | Name     | N      | SAT  | Pos  |
| 32        | 10 | Strong 30 | 193.2  | .541 | .486 | 4             | 90 | U-Shaped | 1606.8 | .920 | .799 |
| 32        | 30 | Strong 30 | 544.9  | .741 | .746 | 4             | 70 | U-Shaped | 1255.1 | .903 | .832 |
| 32        | 50 | Strong 30 | 902.1  | .811 | .855 | 4             | 50 | U-Shaped | 897.9  | .841 | .814 |
| 32        | 70 | Strong 30 | 1258.7 | .837 | .915 | 4             | 30 | U-Shaped | 541.3  | .747 | .756 |
| 32        | 90 | Strong 30 | 1617.6 | .866 | .924 | 4             | 10 | U-Shaped | 182.3  | .519 | .548 |

| Shockable |    |           |        |      |      | Non-Shockable |    |            |        |      |      |
|-----------|----|-----------|--------|------|------|---------------|----|------------|--------|------|------|
| #         | %  | Name      | N      | SAT  | Pos  | #             | %  | Name       | N      | SAT  | Pos  |
| 32        | 10 | Strong 30 | 190.9  | .534 | .719 | 42            | 90 | Increasing | 1609   | .598 | .902 |
| 32        | 30 | Strong 30 | 546.6  | .732 | .872 | 42            | 70 | Increasing | 1253.4 | .479 | .887 |
| 32        | 50 | Strong 30 | 903.5  | .817 | .908 | 42            | 50 | Increasing | 896.5  | .276 | .828 |
| 32        | 70 | Strong 30 | 1259.1 | .852 | .944 | 42            | 30 | Increasing | 540.9  | .114 | .758 |

|    |    |           |        |      |      |    |    |            |       |      |      |
|----|----|-----------|--------|------|------|----|----|------------|-------|------|------|
| 32 | 90 | Strong 30 | 1617.1 | .860 | .940 | 42 | 10 | Increasing | 182.9 | .011 | .575 |
|----|----|-----------|--------|------|------|----|----|------------|-------|------|------|

| Shockable |    |           |        |      |      | Non-Shockable |    |          |        |      |      |
|-----------|----|-----------|--------|------|------|---------------|----|----------|--------|------|------|
| #         | %  | Name      | N      | SAT  | Pos  | #             | %  | Name     | N      | SAT  | Pos  |
| 32        | 10 | Strong 30 | 180.4  | .535 | .773 | 53            | 90 | Large 48 | 1619.4 | .788 | .996 |
| 32        | 30 | Strong 30 | 540.5  | .734 | .926 | 57            | 30 | Large 48 | 1259.5 | .813 | .993 |
| 32        | 50 | Strong 30 | 899.3  | .811 | .961 | 55            | 50 | Large 48 | 900.7  | .783 | .978 |
| 32        | 70 | Strong 30 | 1258.2 | .842 | .973 | 53            | 30 | Large 48 | 540.9  | .661 | .932 |
| 32        | 90 | Strong 30 | 1618.3 | .879 | .950 | 53            | 10 | Large 48 | 181.8  | .310 | .743 |

The following subsections present the individual operating characteristics for each of the scenarios presented in Table 4.5.

4.5.1 10% Shockable: Strong Treatment Effects at 30 Hours with  
90% Non-shockable: Null Treatment Effect (Scenario 32.1.1)

**Table 4.5.1A: Summary Scenario Operating Characteristics**

|                                       | Shockable | Non-Shockable |
|---------------------------------------|-----------|---------------|
| Pr(Select Acceptable Target Duration) | 0.606     | 0.913         |
| Pr(Positive Duration Response)        | 0.306     | 0.104         |
| Pr(Futility)                          | 0.000     | 0.354         |
| Pr(Open 6 Hours)                      | 0.152     | 0.836         |
| Pr(Open 60 Hours)                     | 0.150     | 0.039         |
| Pr(Open 72 Hours)                     | 0.013     | 0.003         |

**Table 4.5.1B: Detailed Scenario Operating Characteristics**

|         | Shockable Rhythm  |       |             |                   | Non-Shockable Rhythm |        |             |                   |
|---------|-------------------|-------|-------------|-------------------|----------------------|--------|-------------|-------------------|
|         | Mean Weighted mRS | N     | Pr (Target) | Pr (Target & Eff) | Mean Weighted mRS    | N      | Pr (Target) | Pr (Target & Eff) |
| 6 Hour  | 4.85              | 3.4   | 0.102       | 0.000             | 4.85                 | 137.4  | 0.458       | 0.000             |
| 12 Hour | 5.27              | 47.8  | 0.120       | 0.006             | 4.85                 | 336.3  | 0.382       | 0.045             |
| 18 Hour | 5.62              | 47.0  | 0.126       | 0.022             | 4.85                 | 214.9  | 0.073       | 0.023             |
| 24 Hour | 5.95              | 60.2  | 0.150       | 0.046             | 4.85                 | 230.2  | 0.039       | 0.016             |
| 30 Hour | 6.38              | 57.3  | 0.181       | 0.082             | 4.85                 | 144.7  | 0.019       | 0.008             |
| 36 Hour | 6.38              | 53.5  | 0.178       | 0.088             | 4.85                 | 126.6  | 0.010       | 0.004             |
| 42 Hour | 6.38              | 43.1  | 0.097       | 0.042             | 4.85                 | 108.8  | 0.008       | 0.004             |
| 48 Hour | 6.38              | 37.7  | 0.040       | 0.018             | 4.85                 | 143.2  | 0.011       | 0.003             |
| 60 Hour | 6.38              | 4.0   | 0.004       | 0.003             | 4.85                 | 3.6    | 0.000       | 0.000             |
| 72 Hour | 6.38              | 0.2   | 0.000       | 0.000             | 4.85                 | 0.2    | 0.000       | 0.000             |
|         |                   | 354.1 |             | 0.306             |                      | 1445.9 |             | 0.104             |

4.5.2 30% Shockable: Strong Treatment Effects at 30 Hours with  
70% Non-shockable: Null Treatment Effect (Scenario 32.1.3)

**Table 4.5.2A: Summary Scenario Operating Characteristics**

|                                       | Shockable | Non-Shockable |
|---------------------------------------|-----------|---------------|
| Pr(Select Acceptable Target Duration) | 0.744     | 0.903         |
| Pr(Positive Duration Response)        | 0.550     | 0.202         |
| Pr(Futility)                          | 0.003     | 0.294         |
| Pr(Open 6 Hours)                      | 0.294     | 0.831         |
| Pr(Open 60 Hours)                     | 0.274     | 0.034         |
| Pr(Open 72 Hours)                     | 0.039     | 0.001         |

**Table 4.5.2B: Detailed Scenario Operating Characteristics**

|         | Shockable Rhythm  |       |             |                   | Non-Shockable Rhythm |       |             |                   |
|---------|-------------------|-------|-------------|-------------------|----------------------|-------|-------------|-------------------|
|         | Mean Weighted mRS | N     | Pr (Target) | Pr (Target & Eff) | Mean Weighted mRS    | N     | Pr (Target) | Pr (Target & Eff) |
| 6 Hour  | 4.85              | 9.7   | 0.042       | 0.000             | 4.85                 | 105.5 | 0.432       | 0.000             |
| 12 Hour | 5.27              | 79.3  | 0.038       | 0.006             | 4.85                 | 263.7 | 0.395       | 0.104             |
| 18 Hour | 5.62              | 75.2  | 0.092       | 0.034             | 4.85                 | 172.3 | 0.076       | 0.037             |
| 24 Hour | 5.95              | 111.1 | 0.138       | 0.075             | 4.85                 | 184.5 | 0.042       | 0.023             |
| 30 Hour | 6.38              | 103.8 | 0.259       | 0.164             | 4.85                 | 118.8 | 0.020       | 0.014             |
| 36 Hour | 6.38              | 97.9  | 0.222       | 0.140             | 4.85                 | 104.7 | 0.015       | 0.011             |
| 42 Hour | 6.38              | 79.5  | 0.125       | 0.078             | 4.85                 | 88.8  | 0.012       | 0.008             |
| 48 Hour | 6.38              | 78.4  | 0.067       | 0.040             | 4.85                 | 112.8 | 0.008       | 0.006             |
| 60 Hour | 6.38              | 10.4  | 0.016       | 0.013             | 4.85                 | 2.3   | 0.000       | 0.000             |
| 72 Hour | 6.38              | 0.9   | 0.000       | 0.000             | 4.85                 | 0.1   | 0.000       | 0.000             |
|         |                   | 646   |             | 0.55              |                      | 1153  |             | 0.202             |

4.5.3 *50% Shockable: Strong Treatment Effects at 30 Hours with  
50% Non-shockable: Null Treatment Effect (Scenario 32.1.5)*

**Table 4.5.3A: Summary Scenario Operating Characteristics**

|                                              | <b>Shockable</b> | <b>Non-Shockable</b> |
|----------------------------------------------|------------------|----------------------|
| <b>Pr(Select Acceptable Target Duration)</b> | <b>0.824</b>     | <b>0.889</b>         |
| Pr(Positive Duration Response)               | 0.748            | 0.259                |
| Pr(Futility)                                 | 0.003            | 0.191                |
| Pr(Open 6 Hours)                             | 0.264            | 0.774                |
| Pr(Open 60 Hours)                            | 0.349            | 0.043                |
| Pr(Open 72 Hours)                            | 0.054            | 0.004                |

**Table 4.5.3B: Detailed Scenario Operating Characteristics**

|         | <b>Shockable Rhythm</b>          |              |                        |                                      | <b>Non-Shockable Rhythm</b>      |              |                        |                                      |
|---------|----------------------------------|--------------|------------------------|--------------------------------------|----------------------------------|--------------|------------------------|--------------------------------------|
|         | <b>Mean<br/>Weighted<br/>mRS</b> | <b>N</b>     | <b>Pr<br/>(Target)</b> | <b>Pr<br/>(Target<br/>&amp; Eff)</b> | <b>Mean<br/>Weighted<br/>mRS</b> | <b>N</b>     | <b>Pr<br/>(Target)</b> | <b>Pr<br/>(Target<br/>&amp; Eff)</b> |
| 6 Hour  | 4.85                             | 10.6         | 0.016                  | 0.000                                | <i>4.85</i>                      | <i>72.6</i>  | <i>0.423</i>           | <i>0.000</i>                         |
| 12 Hour | 5.27                             | 100.5        | 0.020                  | 0.006                                | <i>4.85</i>                      | <i>194.4</i> | <i>0.390</i>           | <i>0.136</i>                         |
| 18 Hour | 5.62                             | 97.1         | 0.062                  | 0.036                                | <i>4.85</i>                      | <i>129.6</i> | <i>0.076</i>           | <i>0.041</i>                         |
| 24 Hour | <i>5.95</i>                      | <i>160.1</i> | <i>0.112</i>           | <i>0.080</i>                         | 4.85                             | 138.6        | 0.054                  | 0.039                                |
| 30 Hour | <i>6.38</i>                      | <i>157.5</i> | <i>0.313</i>           | <i>0.241</i>                         | 4.85                             | 90.7         | 0.020                  | 0.014                                |
| 36 Hour | <i>6.38</i>                      | <i>152.4</i> | <i>0.282</i>           | <i>0.229</i>                         | 4.85                             | 79.6         | 0.015                  | 0.011                                |
| 42 Hour | <i>6.38</i>                      | <i>122.2</i> | <i>0.117</i>           | <i>0.094</i>                         | 4.85                             | 67.0         | 0.012                  | 0.010                                |
| 48 Hour | 6.38                             | 120.8        | 0.064                  | 0.050                                | 4.85                             | 83.4         | 0.009                  | 0.006                                |
| 60 Hour | 6.38                             | 18.9         | 0.013                  | 0.010                                | 4.85                             | 2            | 0.002                  | 0.001                                |
| 72 Hour | 6.38                             | 1.6          | 0.002                  | 0.001                                | 4.85                             | 0.1          | 0.000                  | 0.000                                |
|         |                                  | 942          |                        | 0.748                                |                                  | 858          |                        | 0.259                                |

4.5.4 70% Shockable: Strong Treatment Effects at 30 Hours with  
30% Non-shockable: Null Treatment Effect (Scenario 32.1.7)

**Table 4.5.4A: Summary Scenario Operating Characteristics**

|                                       | Shockable | Non-Shockable |
|---------------------------------------|-----------|---------------|
| Pr(Select Acceptable Target Duration) | 0.850     | 0.872         |
| Pr(Positive Duration Response)        | 0.827     | 0.295         |
| Pr(Futility)                          | 0.004     | 0.074         |
| Pr(Open 6 Hours)                      | 0.235     | 0.699         |
| Pr(Open 60 Hours)                     | 0.426     | 0.040         |
| Pr(Open 72 Hours)                     | 0.082     | 0.001         |

**Table 4.5.4B: Detailed Scenario Operating Characteristics**

|         | Shockable Rhythm  |       |             |                   | Non-Shockable Rhythm |       |             |                   |
|---------|-------------------|-------|-------------|-------------------|----------------------|-------|-------------|-------------------|
|         | Mean Weighted mRS | N     | Pr (Target) | Pr (Target & Eff) | Mean Weighted mRS    | N     | Pr (Target) | Pr (Target & Eff) |
| 6 Hour  | 4.85              | 10.9  | 0.010       | 0.000             | 4.85                 | 38.8  | 0.407       | 0.000             |
| 12 Hour | 5.27              | 117.4 | 0.008       | 0.004             | 4.85                 | 120.3 | 0.374       | 0.145             |
| 18 Hour | 5.62              | 114.3 | 0.045       | 0.031             | 4.85                 | 82.4  | 0.091       | 0.056             |
| 24 Hour | 5.95              | 209.8 | 0.104       | 0.080             | 4.85                 | 87.7  | 0.048       | 0.034             |
| 30 Hour | 6.38              | 217.9 | 0.297       | 0.254             | 4.85                 | 58.6  | 0.030       | 0.024             |
| 36 Hour | 6.38              | 214.4 | 0.308       | 0.267             | 4.85                 | 51.6  | 0.021       | 0.016             |
| 42 Hour | 6.38              | 171.1 | 0.141       | 0.120             | 4.85                 | 43    | 0.018       | 0.012             |
| 48 Hour | 6.38              | 170.8 | 0.067       | 0.056             | 4.85                 | 51.9  | 0.011       | 0.008             |
| 60 Hour | 6.38              | 33.6  | 0.019       | 0.015             | 4.85                 | 1.1   | 0.000       | 0.000             |
| 72 Hour | 6.38              | 3.8   | 0.000       | 0.000             | 4.85                 | 0     | 0.000       | 0.000             |
|         |                   | 1264  |             | 0.827             |                      | 536   |             | 0.295             |

4.5.5 90% Shockable: Strong Treatment Effects at 30 Hours with  
10% Non-shockable: Null Treatment Effect (Scenario 32.1.9)

**Table 4.5.5A: Summary Scenario Operating Characteristics**

|                                       | Shockable | Non-Shockable |
|---------------------------------------|-----------|---------------|
| Pr(Select Acceptable Target Duration) | 0.866     | 0.859         |
| Pr(Positive Duration Response)        | 0.914     | 0.334         |
| Pr(Futility)                          | 0.003     | 0.001         |
| Pr(Open 6 Hours)                      | 0.195     | 0.327         |
| Pr(Open 60 Hours)                     | 0.459     | 0.028         |
| Pr(Open 72 Hours)                     | 0.105     | 0.002         |

**Table 4.5.5B: Detailed Scenario Operating Characteristics**

|         | Shockable Rhythm  |       |             |                   | Non-Shockable Rhythm |      |             |                   |
|---------|-------------------|-------|-------------|-------------------|----------------------|------|-------------|-------------------|
|         | Mean Weighted mRS | N     | Pr (Target) | Pr (Target & Eff) | Mean Weighted mRS    | N    | Pr (Target) | Pr (Target & Eff) |
| 6 Hour  | 4.85              | 9.9   | 0.004       | 0.000             | 4.85                 | 3.6  | 0.378       | 0.000             |
| 12 Hour | 5.27              | 131.3 | 0.004       | 0.002             | 4.85                 | 41.5 | 0.366       | 0.150             |
| 18 Hour | 5.62              | 130.2 | 0.035       | 0.031             | 4.85                 | 29.7 | 0.115       | 0.070             |
| 24 Hour | 5.95              | 264.7 | 0.096       | 0.084             | 4.85                 | 31.9 | 0.060       | 0.046             |
| 30 Hour | 6.38              | 301.1 | 0.338       | 0.315             | 4.85                 | 22.2 | 0.033       | 0.026             |
| 36 Hour | 6.38              | 292.1 | 0.302       | 0.284             | 4.85                 | 19.1 | 0.024       | 0.020             |
| 42 Hour | 6.38              | 220.4 | 0.130       | 0.117             | 4.85                 | 15.5 | 0.018       | 0.015             |
| 48 Hour | 6.38              | 215.6 | 0.064       | 0.058             | 4.85                 | 17.8 | 0.007       | 0.006             |
| 60 Hour | 6.38              | 46.6  | 0.026       | 0.022             | 4.85                 | 0.3  | 0.000       | 0.000             |
| 72 Hour | 6.38              | 5.9   | 0.001       | 0.001             | 4.85                 | 0    | 0.000       | 0.000             |
|         |                   | 1618  |             | 0.914             |                      | 182  |             | 0.334             |



4.5.6 *10% Shockable: Strong Treatment Effects at 30 Hours with  
90% Non-shockable: Small Treatment Effect at 18 Hours (Scenario 32.21.1)*

**Table 4.5.6A: Summary Scenario Operating Characteristics**

|                                              | <b>Shockable</b> | <b>Non-Shockable</b> |
|----------------------------------------------|------------------|----------------------|
| <b>Pr(Select Acceptable Target Duration)</b> | <b>0.544</b>     | <b>0.771</b>         |
| Pr(Positive Duration Response)               | 0.442            | 0.672                |
| Pr(Futility)                                 | 0.000            | 0.040                |
| Pr(Open 6 Hours)                             | 0.150            | 0.536                |
| Pr(Open 60 Hours)                            | 0.109            | 0.111                |
| Pr(Open 72 Hours)                            | 0.005            | 0.008                |

**Table 4.5.6B: Detailed Scenario Operating Characteristics**

|                | <b>Shockable Rhythm</b>          |             |                        |                                      | <b>Non-Shockable Rhythm</b>      |              |                        |                                      |
|----------------|----------------------------------|-------------|------------------------|--------------------------------------|----------------------------------|--------------|------------------------|--------------------------------------|
|                | <b>Mean<br/>Weighted<br/>mRS</b> | <b>N</b>    | <b>Pr<br/>(Target)</b> | <b>Pr<br/>(Target<br/>&amp; Eff)</b> | <b>Mean<br/>Weighted<br/>mRS</b> | <b>N</b>     | <b>Pr<br/>(Target)</b> | <b>Pr<br/>(Target<br/>&amp; Eff)</b> |
| 6 Hour         | 4.85                             | 1.4         | 0.132                  | 0.000                                | 4.85                             | 42.4         | 0.046                  | 0.000                                |
| 12 Hour        | 5.27                             | 33.1        | 0.152                  | 0.024                                | 5.39                             | 252.9        | 0.078                  | 0.041                                |
| 18 Hour        | 5.62                             | 28.0        | 0.142                  | 0.054                                | <b>5.93</b>                      | <b>304.0</b> | <b>0.399</b>           | <b>0.277</b>                         |
| <b>24 Hour</b> | <b>5.95</b>                      | <b>36.2</b> | <b>0.156</b>           | <b>0.099</b>                         | <b>5.93</b>                      | <b>329.9</b> | <b>0.287</b>           | <b>0.207</b>                         |
| <b>30 Hour</b> | <b>6.38</b>                      | <b>29.5</b> | <b>0.164</b>           | <b>0.103</b>                         | <b>5.93</b>                      | <b>203.9</b> | <b>0.085</b>           | <b>0.065</b>                         |
| <b>36 Hour</b> | <b>6.38</b>                      | <b>27.2</b> | <b>0.138</b>           | <b>0.092</b>                         | 5.93                             | 163.0        | 0.046                  | 0.038                                |
| <b>42 Hour</b> | <b>6.38</b>                      | <b>22.1</b> | <b>0.086</b>           | <b>0.053</b>                         | 5.93                             | 133.4        | 0.031                  | 0.022                                |
| 48 Hour        | 6.38                             | 22.7        | 0.028                  | 0.016                                | 5.93                             | 159.1        | 0.024                  | 0.018                                |
| 60 Hour        | 6.38                             | 1.3         | 0.001                  | 0.001                                | 5.93                             | 9.4          | 0.004                  | 0.004                                |
| 72 Hour        | 6.38                             | 0.0         | 0.000                  | 0.000                                | 5.93                             | 0.5          | 0.000                  | 0.000                                |
|                |                                  | 201.5       |                        | 0.442                                |                                  | 1598.5       |                        | 0.672                                |

4.5.7 *30% Shockable: Strong Treatment Effects at 30 Hours with  
70% Non-shockable: Small Treatment Effect at 18 Hours (Scenario 32.21.3)*

**Table 4.5.7A: Summary Scenario Operating Characteristics**

|                                              | <b>Shockable</b> | <b>Non-Shockable</b> |
|----------------------------------------------|------------------|----------------------|
| <b>Pr(Select Acceptable Target Duration)</b> | <b>0.737</b>     | <b>0.730</b>         |
| Pr(Positive Duration Response)               | 0.715            | 0.742                |
| Pr(Futility)                                 | 0.002            | 0.034                |
| Pr(Open 6 Hours)                             | 0.271            | 0.551                |
| Pr(Open 60 Hours)                            | 0.252            | 0.101                |
| Pr(Open 72 Hours)                            | 0.033            | 0.008                |

**Table 4.5.7B: Detailed Scenario Operating Characteristics**

|         | <b>Shockable Rhythm</b>  |             |                    |                              | <b>Non-Shockable Rhythm</b> |              |                    |                              |
|---------|--------------------------|-------------|--------------------|------------------------------|-----------------------------|--------------|--------------------|------------------------------|
|         | <b>Mean Weighted mRS</b> | <b>N</b>    | <b>Pr (Target)</b> | <b>Pr (Target &amp; Eff)</b> | <b>Mean Weighted mRS</b>    | <b>N</b>     | <b>Pr (Target)</b> | <b>Pr (Target &amp; Eff)</b> |
| 6 Hour  | 4.85                     | 7.6         | 0.047              | 0.000                        | 4.85                        | 38.2         | 0.050              | 0.000                        |
| 12 Hour | 5.27                     | 73.6        | 0.052              | 0.018                        | 5.39                        | 209.1        | 0.117              | 0.066                        |
| 18 Hour | 5.62                     | 66.3        | 0.095              | 0.063                        | <b>5.93</b>                 | <b>228.5</b> | <b>0.367</b>       | <b>0.287</b>                 |
| 24 Hour | <b>5.95</b>              | <b>96.4</b> | <b>0.139</b>       | <b>0.099</b>                 | <b>5.93</b>                 | <b>248.8</b> | <b>0.273</b>       | <b>0.222</b>                 |
| 30 Hour | <b>6.38</b>              | <b>84.4</b> | <b>0.230</b>       | <b>0.188</b>                 | <b>5.93</b>                 | <b>157.7</b> | <b>0.090</b>       | <b>0.076</b>                 |
| 36 Hour | <b>6.38</b>              | <b>80.5</b> | <b>0.235</b>       | <b>0.191</b>                 | 5.93                        | 129.1        | 0.045              | 0.040                        |
| 42 Hour | <b>6.38</b>              | <b>66.4</b> | <b>0.133</b>       | <b>0.104</b>                 | 5.93                        | 106          | 0.034              | 0.029                        |
| 48 Hour | 6.38                     | 68          | 0.057              | 0.041                        | 5.93                        | 124.8        | 0.024              | 0.020                        |
| 60 Hour | 6.38                     | 7.3         | 0.012              | 0.011                        | 5.93                        | 6.2          | 0.002              | 0.002                        |
| 72 Hour | 6.38                     | 0.6         | 0.000              | 0.000                        | 5.93                        | 0.2          | 0.000              | 0.000                        |
|         |                          | 551         |                    | 0.715                        |                             | 1248         |                    | 0.742                        |

4.5.8 *50% Shockable: Strong Treatment Effects at 30 Hours with  
50% Non-shockable: Small Treatment Effect at 18 Hours (Scenario 32.21.5)*

**Table 4.5.8A: Summary Scenario Operating Characteristics**

|                                              | <b>Shockable</b> | <b>Non-Shockable</b> |
|----------------------------------------------|------------------|----------------------|
| <b>Pr(Select Acceptable Target Duration)</b> | <b>0.816</b>     | <b>0.671</b>         |
| Pr(Positive Duration Response)               | 0.844            | 0.733                |
| Pr(Futility)                                 | 0.004            | 0.026                |
| Pr(Open 6 Hours)                             | 0.259            | 0.560                |
| Pr(Open 60 Hours)                            | 0.354            | 0.078                |
| Pr(Open 72 Hours)                            | 0.049            | 0.005                |

**Table 4.5.8B: Detailed Scenario Operating Characteristics**

|         | <b>Shockable Rhythm</b>  |              |                    |                              | <b>Non-Shockable Rhythm</b> |              |                    |                              |
|---------|--------------------------|--------------|--------------------|------------------------------|-----------------------------|--------------|--------------------|------------------------------|
|         | <b>Mean Weighted mRS</b> | <b>N</b>     | <b>Pr (Target)</b> | <b>Pr (Target &amp; Eff)</b> | <b>Mean Weighted mRS</b>    | <b>N</b>     | <b>Pr (Target)</b> | <b>Pr (Target &amp; Eff)</b> |
| 6 Hour  | 4.85                     | 10.1         | 0.017              | 0.000                        | 4.85                        | 30.5         | 0.086              | 0.000                        |
| 12 Hour | 5.27                     | 99.1         | 0.014              | 0.006                        | 5.39                        | 159.9        | 0.148              | 0.092                        |
| 18 Hour | 5.62                     | 94.3         | 0.067              | 0.054                        | <b>5.93</b>                 | <b>159.2</b> | <b>0.361</b>       | <b>0.294</b>                 |
| 24 Hour | <b>5.95</b>              | <b>156.3</b> | <b>0.128</b>       | <b>0.112</b>                 | <b>5.93</b>                 | <b>173.5</b> | <b>0.229</b>       | <b>0.193</b>                 |
| 30 Hour | <b>6.38</b>              | <b>149.2</b> | <b>0.270</b>       | <b>0.241</b>                 | <b>5.93</b>                 | <b>111.7</b> | <b>0.081</b>       | <b>0.074</b>                 |
| 36 Hour | <b>6.38</b>              | <b>142.8</b> | <b>0.285</b>       | <b>0.248</b>                 | 5.93                        | 92.4         | 0.043              | 0.036                        |
| 42 Hour | <b>6.38</b>              | <b>115.4</b> | <b>0.133</b>       | <b>0.112</b>                 | 5.93                        | 76.1         | 0.036              | 0.031                        |
| 48 Hour | 6.38                     | 117.4        | 0.074              | 0.063                        | 5.93                        | 89           | 0.014              | 0.013                        |
| 60 Hour | 6.38                     | 18           | 0.012              | 0.009                        | 5.93                        | 3.3          | 0.001              | 0.001                        |
| 72 Hour | 6.38                     | 1.6          | 0.000              | 0.000                        | 5.93                        | 0.1          | 0.000              | 0.000                        |
|         |                          | 904          |                    | 0.844                        |                             | 896          |                    | 0.733                        |

4.5.9 70% Shockable: Strong Treatment Effects at 30 Hours with  
30% Non-shockable: Small Treatment Effect at 18 Hours (Scenario 32.21.7)

**Table 4.5.9A: Summary Scenario Operating Characteristics**

|                                       | Shockable | Non-Shockable |
|---------------------------------------|-----------|---------------|
| Pr(Select Acceptable Target Duration) | 0.845     | 0.567         |
| Pr(Positive Duration Response)        | 0.903     | 0.672         |
| Pr(Futility)                          | 0.002     | 0.009         |
| Pr(Open 6 Hours)                      | 0.225     | 0.486         |
| Pr(Open 60 Hours)                     | 0.420     | 0.061         |
| Pr(Open 72 Hours)                     | 0.075     | 0.004         |

**Table 4.5.9B: Detailed Scenario Operating Characteristics**

|         | Shockable Rhythm  |       |             |                   | Non-Shockable Rhythm |       |             |                   |
|---------|-------------------|-------|-------------|-------------------|----------------------|-------|-------------|-------------------|
|         | Mean Weighted mRS | N     | Pr (Target) | Pr (Target & Eff) | Mean Weighted mRS    | N     | Pr (Target) | Pr (Target & Eff) |
| 6 Hour  | 4.85              | 10.4  | 0.008       | 0.000             | 4.85                 | 18.1  | 0.132       | 0.000             |
| 12 Hour | 5.27              | 117.2 | 0.008       | 0.006             | 5.39                 | 102.3 | 0.204       | 0.123             |
| 18 Hour | 5.62              | 116.3 | 0.052       | 0.045             | 5.93                 | 90.6  | 0.307       | 0.239             |
| 24 Hour | 5.95              | 210.6 | 0.104       | 0.093             | 5.93                 | 101.3 | 0.183       | 0.158             |
| 30 Hour | 6.38              | 218.6 | 0.298       | 0.275             | 5.93                 | 67.5  | 0.077       | 0.067             |
| 36 Hour | 6.38              | 215.4 | 0.299       | 0.278             | 5.93                 | 57.2  | 0.042       | 0.040             |
| 42 Hour | 6.38              | 169.2 | 0.144       | 0.130             | 5.93                 | 46.9  | 0.034       | 0.028             |
| 48 Hour | 6.38              | 168   | 0.066       | 0.058             | 5.93                 | 54.2  | 0.019       | 0.015             |
| 60 Hour | 6.38              | 31.4  | 0.020       | 0.017             | 5.93                 | 1.6   | 0.002       | 0.002             |
| 72 Hour | 6.38              | 3.2   | 0.001       | 0.001             | 5.93                 | 0.1   | 0.000       | 0.000             |
|         |                   | 1260  |             | 0.903             |                      | 540   |             | 0.672             |

4.5.10 90% Shockable: Strong Treatment Effects at 30 Hours with  
10% Non-shockable: Small Treatment Effect at 18 Hours (Scenario 32.21.9)

**Table 4.5.10A: Summary Scenario Operating Characteristics**

|                                       | Shockable | Non-Shockable |
|---------------------------------------|-----------|---------------|
| Pr(Select Acceptable Target Duration) | 0.858     | 0.428         |
| Pr(Positive Duration Response)        | 0.920     | 0.542         |
| Pr(Futility)                          | 0.004     | 0.000         |
| Pr(Open 6 Hours)                      | 0.198     | 0.242         |
| Pr(Open 60 Hours)                     | 0.474     | 0.040         |
| Pr(Open 72 Hours)                     | 0.089     | 0.002         |

**Table 4.5.10B: Detailed Scenario Operating Characteristics**

|         | Shockable Rhythm  |        |             |                   | Non-Shockable Rhythm |       |             |                   |
|---------|-------------------|--------|-------------|-------------------|----------------------|-------|-------------|-------------------|
|         | Mean Weighted mRS | N      | Pr (Target) | Pr (Target & Eff) | Mean Weighted mRS    | N     | Pr (Target) | Pr (Target & Eff) |
| 6 Hour  | 4.85              | 10.2   | 0.004       | 0.000             | 4.85                 | 2.2   | 0.206       | 0.000             |
| 12 Hour | 5.27              | 134.7  | 0.005       | 0.002             | 5.39                 | 37.2  | 0.280       | 0.141             |
| 18 Hour | 5.62              | 132.9  | 0.046       | 0.042             | 5.93                 | 29.8  | 0.212       | 0.144             |
| 24 Hour | 5.95              | 258.8  | 0.089       | 0.081             | 5.93                 | 34    | 0.154       | 0.132             |
| 30 Hour | 6.38              | 294.1  | 0.328       | 0.302             | 5.93                 | 23.7  | 0.062       | 0.052             |
| 36 Hour | 6.38              | 292.2  | 0.318       | 0.300             | 5.93                 | 20.1  | 0.040       | 0.036             |
| 42 Hour | 6.38              | 225.1  | 0.123       | 0.114             | 5.93                 | 16.4  | 0.032       | 0.028             |
| 48 Hour | 6.38              | 218.4  | 0.069       | 0.062             | 5.93                 | 18.6  | 0.013       | 0.009             |
| 60 Hour | 6.38              | 46.6   | 0.017       | 0.015             | 5.93                 | 0.4   | 0.001       | 0.000             |
| 72 Hour | 6.38              | 4.6    | 0.002       | 0.002             | 5.93                 | 0     | 0           | 0.000             |
|         |                   | 1617.6 |             | 0.92              |                      | 182.4 |             | 0.542             |

4.5.11 10% Shockable: Strong Treatment Effects at 30 Hours with  
90% Non-shockable: U-Shaped Duration Response(Scenario 32.41.1)

**Table 4.5.11A: Summary Scenario Operating Characteristics**

|                                       | Shockable | Non-Shockable |
|---------------------------------------|-----------|---------------|
| Pr(Select Acceptable Target Duration) | 0.541     | 0.920         |
| Pr(Positive Duration Response)        | 0.486     | 0.799         |
| Pr(Futility)                          | 0.000     | 0.021         |
| Pr(Open 6 Hours)                      | 0.155     | 0.494         |
| Pr(Open 60 Hours)                     | 0.097     | 0.003         |
| Pr(Open 72 Hours)                     | 0.005     | 0.000         |

**Table 4.5.11B: Detailed Scenario Operating Characteristics**

|         | Shockable Rhythm  |      |             |                   | Non-Shockable Rhythm |       |             |                   |
|---------|-------------------|------|-------------|-------------------|----------------------|-------|-------------|-------------------|
|         | Mean Weighted mRS | N    | Pr (Target) | Pr (Target & Eff) | Mean Weighted mRS    | N     | Pr (Target) | Pr (Target & Eff) |
| 6 Hour  | 4.85              | 1.4  | 0.133       | 0.000             | 4.85                 | 31.6  | 0.024       | 0.000             |
| 12 Hour | 5.27              | 32.7 | 0.160       | 0.041             | 5.62                 | 238.6 | 0.056       | 0.033             |
| 18 Hour | 5.62              | 27.2 | 0.142       | 0.074             | 5.95                 | 282.8 | 0.176       | 0.138             |
| 24 Hour | 5.95              | 34.6 | 0.153       | 0.108             | 6.38                 | 412.4 | 0.414       | 0.348             |
| 30 Hour | 6.38              | 28.4 | 0.169       | 0.122             | 6.38                 | 279.5 | 0.272       | 0.232             |
| 36 Hour | 6.38              | 25.4 | 0.139       | 0.091             | 6.38                 | 171   | 0.058       | 0.047             |
| 42 Hour | 6.38              | 20.7 | 0.080       | 0.037             | 5.95                 | 88.6  | 0.001       | 0.001             |
| 48 Hour | 6.38              | 21.7 | 0.024       | 0.012             | 5.62                 | 102.1 | 0.000       | 0.000             |
| 60 Hour | 6.38              | 1    | 0.001       | 0.001             | 4.85                 | 0.1   | 0.000       | 0.000             |
| 72 Hour | 6.38              | 0    | 0.000       | 0.000             | 4.25                 | 0     | 0.000       | 0.000             |
|         |                   | 193  |             | 0.486             |                      | 1606  |             | 0.799             |

4.5.12 30% Shockable: Strong Treatment Effects at 30 Hours with  
70% Non-shockable: U-Shaped Duration Response (Scenario 32.41.3)

**Table 4.5.12A: Summary Scenario Operating Characteristics**

|                                       | Shockable | Non-Shockable |
|---------------------------------------|-----------|---------------|
| Pr(Select Acceptable Target Duration) | 0.741     | 0.903         |
| Pr(Positive Duration Response)        | 0.746     | 0.832         |
| Pr(Futility)                          | 0.002     | 0.015         |
| Pr(Open 6 Hours)                      | 0.286     | 0.507         |
| Pr(Open 60 Hours)                     | 0.255     | 0.006         |
| Pr(Open 72 Hours)                     | 0.024     | 0.000         |

**Table 4.5.12B: Detailed Scenario Operating Characteristics**

|         | Shockable Rhythm  |      |             |                   | Non-Shockable Rhythm |       |             |                   |
|---------|-------------------|------|-------------|-------------------|----------------------|-------|-------------|-------------------|
|         | Mean Weighted mRS | N    | Pr (Target) | Pr (Target & Eff) | Mean Weighted mRS    | N     | Pr (Target) | Pr (Target & Eff) |
| 6 Hour  | 4.85              | 8.1  | 0.041       | 0.000             | 4.85                 | 30.4  | 0.026       | 0.000             |
| 12 Hour | 5.27              | 73.1 | 0.052       | 0.028             | 5.62                 | 200.2 | 0.069       | 0.047             |
| 18 Hour | 5.62              | 66.2 | 0.100       | 0.072             | 5.95                 | 218.5 | 0.196       | 0.158             |
| 24 Hour | 5.95              | 96.7 | 0.141       | 0.117             | 6.38                 | 300.9 | 0.395       | 0.350             |
| 30 Hour | 6.38              | 83.4 | 0.244       | 0.204             | 6.38                 | 207.7 | 0.249       | 0.222             |
| 36 Hour | 6.38              | 78   | 0.234       | 0.191             | 6.38                 | 136.2 | 0.063       | 0.054             |
| 42 Hour | 6.38              | 64.8 | 0.122       | 0.091             | 5.95                 | 75.8  | 0.003       | 0.002             |
| 48 Hour | 6.38              | 67.2 | 0.060       | 0.038             | 5.62                 | 85.1  | 0.000       | 0.000             |
| 60 Hour | 6.38              | 7.1  | 0.006       | 0.005             | 4.85                 | 0.2   | 0.000       | 0.000             |
| 72 Hour | 6.38              | 0.4  | 0.000       | 0.000             | 4.25                 | 0     | 0.000       | 0.000             |
|         |                   | 545  |             | 0.746             |                      | 1255  |             | 0.832             |

4.5.13 50% Shockable: Strong Treatment Effects at 30 Hours with  
50% Non-shockable: U-Shaped Duration Response (Scenario 32.41.5)

**Table 4.5.13A: Summary Scenario Operating Characteristics**

|                                       | Shockable | Non-Shockable |
|---------------------------------------|-----------|---------------|
| Pr(Select Acceptable Target Duration) | 0.811     | 0.841         |
| Pr(Positive Duration Response)        | 0.855     | 0.814         |
| Pr(Futility)                          | 0.004     | 0.014         |
| Pr(Open 6 Hours)                      | 0.264     | 0.525         |
| Pr(Open 60 Hours)                     | 0.370     | 0.006         |
| Pr(Open 72 Hours)                     | 0.057     | 0.000         |

**Table 4.5.13B: Detailed Scenario Operating Characteristics**

|         | Shockable Rhythm  |       |             |                   | Non-Shockable Rhythm |       |             |                   |
|---------|-------------------|-------|-------------|-------------------|----------------------|-------|-------------|-------------------|
|         | Mean Weighted mRS | N     | Pr (Target) | Pr (Target & Eff) | Mean Weighted mRS    | N     | Pr (Target) | Pr (Target & Eff) |
| 6 Hour  | 4.85              | 10    | 0.016       | 0.000             | 4.85                 | 25.7  | 0.041       | 0.000             |
| 12 Hour | 5.27              | 99    | 0.021       | 0.013             | 5.62                 | 156.8 | 0.116       | 0.080             |
| 18 Hour | 5.62              | 94.7  | 0.068       | 0.056             | 5.95                 | 156   | 0.225       | 0.186             |
| 24 Hour | 5.95              | 154.7 | 0.112       | 0.101             | 6.38                 | 200.1 | 0.344       | 0.304             |
| 30 Hour | 6.38              | 146.7 | 0.284       | 0.257             | 6.38                 | 138.1 | 0.213       | 0.190             |
| 36 Hour | 6.38              | 142.7 | 0.277       | 0.246             | 6.38                 | 96.5  | 0.059       | 0.052             |
| 42 Hour | 6.38              | 116.2 | 0.138       | 0.115             | 5.95                 | 58.8  | 0.002       | 0.002             |
| 48 Hour | 6.38              | 117.5 | 0.063       | 0.048             | 5.62                 | 65.8  | 0.000       | 0.000             |
| 60 Hour | 6.38              | 18.9  | 0.020       | 0.018             | 4.85                 | 0.1   | 0.000       | 0.000             |
| 72 Hour | 6.38              | 1.7   | 0.001       | 0.001             | 4.25                 | 0     | 0.000       | 0.000             |
|         |                   | 902   |             | 0.855             |                      | 898   |             | 0.814             |



4.5.14 70% Shockable: Strong Treatment Effects at 30 Hours with  
30% Non-shockable: U-Shaped Duration Response (Scenario 32.41.7)

**Table 4.5.14A: Summary Scenario Operating Characteristics**

|                                       | Shockable | Non-Shockable |
|---------------------------------------|-----------|---------------|
| Pr(Select Acceptable Target Duration) | 0.837     | 0.747         |
| Pr(Positive Duration Response)        | 0.915     | 0.756         |
| Pr(Futility)                          | 0.003     | 0.006         |
| Pr(Open 6 Hours)                      | 0.234     | 0.505         |
| Pr(Open 60 Hours)                     | 0.418     | 0.010         |
| Pr(Open 72 Hours)                     | 0.080     | 0.000         |

**Table 4.5.14B: Detailed Scenario Operating Characteristics**

|         | Shockable Rhythm  |       |             |                   | Non-Shockable Rhythm |       |             |                   |
|---------|-------------------|-------|-------------|-------------------|----------------------|-------|-------------|-------------------|
|         | Mean Weighted mRS | N     | Pr (Target) | Pr (Target & Eff) | Mean Weighted mRS    | N     | Pr (Target) | Pr (Target & Eff) |
| 6 Hour  | 4.85              | 10.8  | 0.008       | 0.000             | 4.85                 | 16.7  | 0.085       | 0.000             |
| 12 Hour | 5.27              | 118.2 | 0.007       | 0.005             | 5.62                 | 101.7 | 0.162       | 0.107             |
| 18 Hour | 5.62              | 116.3 | 0.060       | 0.052             | 5.95                 | 93.2  | 0.241       | 0.196             |
| 24 Hour | 5.95              | 209.4 | 0.094       | 0.084             | 6.38                 | 112.7 | 0.289       | 0.257             |
| 30 Hour | 6.38              | 217.7 | 0.312       | 0.289             | 6.38                 | 77.2  | 0.161       | 0.140             |
| 36 Hour | 6.38              | 213.7 | 0.299       | 0.281             | 6.38                 | 58    | 0.056       | 0.050             |
| 42 Hour | 6.38              | 169.1 | 0.132       | 0.122             | 5.95                 | 38.5  | 0.006       | 0.006             |
| 48 Hour | 6.38              | 168   | 0.070       | 0.065             | 5.62                 | 43.1  | 0.000       | 0.000             |
| 60 Hour | 6.38              | 32.2  | 0.019       | 0.017             | 4.85                 | 0.2   | 0.000       | 0.000             |
| 72 Hour | 6.38              | 3.5   | 0.000       | 0.000             | 4.25                 | 0     | 0.000       | 0.000             |
|         |                   | 1259  |             | 0.915             |                      | 541   |             | 0.756             |

4.5.15 90% Shockable: Strong Treatment Effects at 30 Hours with  
10% Non-shockable: U-Shaped Duration Response (Scenario 32.41.9)

**Table 4.5.15A: Summary Scenario Operating Characteristics**

|                                       | Shockable | Non-Shockable |
|---------------------------------------|-----------|---------------|
| Pr(Select Acceptable Target Duration) | 0.866     | 0.519         |
| Pr(Positive Duration Response)        | 0.924     | 0.548         |
| Pr(Futility)                          | 0.003     | 0.000         |
| Pr(Open 6 Hours)                      | 0.196     | 0.245         |
| Pr(Open 60 Hours)                     | 0.460     | 0.015         |
| Pr(Open 72 Hours)                     | 0.091     | 0.000         |

**Table 4.5.15B: Detailed Scenario Operating Characteristics**

|         | Shockable Rhythm  |        |             |                   | Non-Shockable Rhythm |       |             |                   |
|---------|-------------------|--------|-------------|-------------------|----------------------|-------|-------------|-------------------|
|         | Mean Weighted mRS | N      | Pr (Target) | Pr (Target & Eff) | Mean Weighted mRS    | N     | Pr (Target) | Pr (Target & Eff) |
| 6 Hour  | 4.85              | 9.7    | 0.006       | 0.000             | 4.85                 | 2.1   | 0.201       | 0.000             |
| 12 Hour | 5.27              | 132.7  | 0.002       | 0.001             | 5.62                 | 37.5  | 0.267       | 0.137             |
| 18 Hour | 5.62              | 134.0  | 0.042       | 0.034             | 5.95                 | 30.6  | 0.192       | 0.126             |
| 24 Hour | 5.95              | 266.1  | 0.093       | 0.085             | 6.38                 | 35.6  | 0.183       | 0.152             |
| 30 Hour | 6.38              | 299.9  | 0.333       | 0.314             | 6.38                 | 24.9  | 0.100       | 0.084             |
| 36 Hour | 6.38              | 290.9  | 0.323       | 0.306             | 6.38                 | 20.1  | 0.044       | 0.039             |
| 42 Hour | 6.38              | 219.7  | 0.117       | 0.107             | 5.95                 | 14.8  | 0.010       | 0.008             |
| 48 Hour | 6.38              | 214.1  | 0.065       | 0.058             | 5.62                 | 16.6  | 0.002       | 0.002             |
| 60 Hour | 6.38              | 45.0   | 0.017       | 0.017             | 4.850                | 0.1   | 0           | 0                 |
| 72 Hour | 6.38              | 5.5    | 0.002       | 0.002             | 4.250                | 0.0   | 0           | 0                 |
|         |                   | 1617.6 |             | 0.924             |                      | 182.3 |             | 0.548             |

4.5.16 10% Shockable: Strong Treatment Effects at 30 Hours with  
90% Non-shockable: Increasing Duration Response (Scenario 32.42.1)

**Table 4.5.16A: Summary Scenario Operating Characteristics**

|                                       | Shockable | Non-Shockable |
|---------------------------------------|-----------|---------------|
| Pr(Select Acceptable Target Duration) | 0.534     | 0.598         |
| Pr(Positive Duration Response)        | 0.719     | 0.901         |
| Pr(Futility)                          | 0.000     | 0.020         |
| Pr(Open 6 Hours)                      | 0.159     | 0.273         |
| Pr(Open 60 Hours)                     | 0.112     | 0.824         |
| Pr(Open 72 Hours)                     | 0.006     | 0.634         |

**Table 4.5.16B: Detailed Scenario Operating Characteristics**

|         | Shockable Rhythm  |       |             |                   | Non-Shockable Rhythm |        |             |                   |
|---------|-------------------|-------|-------------|-------------------|----------------------|--------|-------------|-------------------|
|         | Mean Weighted mRS | N     | Pr (Target) | Pr (Target & Eff) | Mean Weighted mRS    | N      | Pr (Target) | Pr (Target & Eff) |
| 6 Hour  | 4.85              | 1.4   | 0.119       | 0.000             | 4.85                 | 21.3   | 0.019       | 0.000             |
| 12 Hour | 5.27              | 31.9  | 0.170       | 0.108             | 5.015                | 159.7  | 0.016       | 0.006             |
| 18 Hour | 5.62              | 26.4  | 0.138       | 0.108             | 5.18                 | 121.7  | 0.039       | 0.032             |
| 24 Hour | 5.95              | 34.2  | 0.148       | 0.125             | 5.345                | 192.7  | 0.039       | 0.032             |
| 30 Hour | 6.38              | 27.5  | 0.166       | 0.145             | 5.51                 | 150.2  | 0.039       | 0.033             |
| 36 Hour | 6.38              | 25.1  | 0.126       | 0.114             | 5.675                | 175.9  | 0.056       | 0.048             |
| 42 Hour | 6.38              | 21.1  | 0.094       | 0.084             | 5.84                 | 202.5  | 0.066       | 0.056             |
| 48 Hour | 6.38              | 22.1  | 0.035       | 0.031             | 6.14                 | 284.5  | 0.128       | 0.109             |
| 60 Hour | 6.38              | 1.2   | 0.004       | 0.004             | 6.44                 | 167.8  | 0.159       | 0.151             |
| 72 Hour | 6.38              | 0.0   | 0.000       | 0.000             | 7.04                 | 132.7  | 0.439       | 0.435             |
|         |                   | 190.9 |             | 0.719             |                      | 1609.0 |             | 0.902             |

4.5.17 30% Shockable: Strong Treatment Effects at 30 Hours with  
70% Non-shockable: Increasing Duration Response (Scenario 32.42.3)

**Table 4.5.17A: Summary Scenario Operating Characteristics**

|                                       | Shockable | Non-Shockable |
|---------------------------------------|-----------|---------------|
| Pr(Select Acceptable Target Duration) | 0.732     | 0.479         |
| Pr(Positive Duration Response)        | 0.872     | 0.887         |
| Pr(Futility)                          | 0.001     | 0.015         |
| Pr(Open 6 Hours)                      | 0.285     | 0.296         |
| Pr(Open 60 Hours)                     | 0.254     | 0.766         |
| Pr(Open 72 Hours)                     | 0.025     | 0.517         |

**Table 4.5.17B: Detailed Scenario Operating Characteristics**

|         | Shockable Rhythm  |      |             |                   | Non-Shockable Rhythm |       |             |                   |
|---------|-------------------|------|-------------|-------------------|----------------------|-------|-------------|-------------------|
|         | Mean Weighted mRS | N    | Pr (Target) | Pr (Target & Eff) | Mean Weighted mRS    | N     | Pr (Target) | Pr (Target & Eff) |
| 6 Hour  | 4.85              | 8.1  | 0.042       | 0.000             | 4.85                 | 20.4  | 0.030       | 0.000             |
| 12 Hour | 5.27              | 72.8 | 0.052       | 0.040             | 5.015                | 139.6 | 0.028       | 0.017             |
| 18 Hour | 5.62              | 66.1 | 0.100       | 0.086             | 5.18                 | 107.7 | 0.046       | 0.033             |
| 24 Hour | 5.95              | 96.6 | 0.135       | 0.120             | 5.345                | 159.9 | 0.052       | 0.046             |
| 30 Hour | 6.38              | 84.3 | 0.262       | 0.244             | 5.51                 | 126   | 0.052       | 0.047             |
| 36 Hour | 6.38              | 79.2 | 0.225       | 0.207             | 5.675                | 143.4 | 0.058       | 0.051             |
| 42 Hour | 6.38              | 64.6 | 0.110       | 0.103             | 5.84                 | 161   | 0.085       | 0.074             |
| 48 Hour | 6.38              | 67.3 | 0.066       | 0.064             | 6.14                 | 219   | 0.170       | 0.150             |
| 60 Hour | 6.38              | 7.1  | 0.009       | 0.008             | 6.44                 | 109.9 | 0.172       | 0.165             |
| 72 Hour | 6.38              | 0.5  | 0.000       | 0.000             | 7.04                 | 66.5  | 0.307       | 0.304             |
|         |                   | 547  |             | 0.872             |                      | 1253  |             | 0.887             |

4.5.18 50% Shockable: Strong Treatment Effects at 30 Hours with  
50% Non-shockable: Increasing Duration Response (Scenario 32.42.5)

**Table 4.5.18A: Summary Scenario Operating Characteristics**

|                                       | Shockable | Non-Shockable |
|---------------------------------------|-----------|---------------|
| Pr(Select Acceptable Target Duration) | 0.817     | 0.276         |
| Pr(Positive Duration Response)        | 0.908     | 0.828         |
| Pr(Futility)                          | 0.004     | 0.020         |
| Pr(Open 6 Hours)                      | 0.281     | 0.352         |
| Pr(Open 60 Hours)                     | 0.336     | 0.580         |
| Pr(Open 72 Hours)                     | 0.050     | 0.306         |

**Table 4.5.18B: Detailed Scenario Operating Characteristics**

|         | Shockable Rhythm  |       |             |                   | Non-Shockable Rhythm |       |             |                   |
|---------|-------------------|-------|-------------|-------------------|----------------------|-------|-------------|-------------------|
|         | Mean Weighted mRS | N     | Pr (Target) | Pr (Target & Eff) | Mean Weighted mRS    | N     | Pr (Target) | Pr (Target & Eff) |
| 6 Hour  | 4.85              | 11.4  | 0.022       | 0.000             | 4.85                 | 20.1  | 0.052       | 0.000             |
| 12 Hour | 5.27              | 100.7 | 0.018       | 0.013             | 5.015                | 119.1 | 0.078       | 0.050             |
| 18 Hour | 5.62              | 96    | 0.065       | 0.054             | 5.18                 | 92.4  | 0.074       | 0.058             |
| 24 Hour | 5.95              | 156.7 | 0.132       | 0.122             | 5.345                | 127.7 | 0.062       | 0.053             |
| 30 Hour | 6.38              | 149   | 0.288       | 0.266             | 5.51                 | 100.2 | 0.071       | 0.065             |
| 36 Hour | 6.38              | 142.7 | 0.271       | 0.258             | 5.675                | 108.4 | 0.085       | 0.079             |
| 42 Hour | 6.38              | 114.1 | 0.126       | 0.120             | 5.84                 | 114   | 0.110       | 0.099             |
| 48 Hour | 6.38              | 115.2 | 0.064       | 0.060             | 6.14                 | 144.6 | 0.192       | 0.164             |
| 60 Hour | 6.38              | 16.4  | 0.014       | 0.014             | 6.44                 | 49.7  | 0.165       | 0.150             |
| 72 Hour | 6.38              | 1.3   | 0.000       | 0.000             | 7.04                 | 20.2  | 0.111       | 0.110             |
|         |                   | 904   |             | 0.908             |                      | 897   |             | 0.828             |

4.5.19 70% Shockable: Strong Treatment Effects at 30 Hours with  
30% Non-shockable: Increasing Duration Response (Scenario 32.42.7)

**Table 4.5.19A: Summary Scenario Operating Characteristics**

|                                       | Shockable | Non-Shockable |
|---------------------------------------|-----------|---------------|
| Pr(Select Acceptable Target Duration) | 0.852     | 0.114         |
| Pr(Positive Duration Response)        | 0.944     | 0.758         |
| Pr(Futility)                          | 0.004     | 0.006         |
| Pr(Open 6 Hours)                      | 0.226     | 0.355         |
| Pr(Open 60 Hours)                     | 0.413     | 0.396         |
| Pr(Open 72 Hours)                     | 0.082     | 0.146         |

**Table 4.5.19B: Detailed Scenario Operating Characteristics**

|         | Shockable Rhythm  |       |             |                   | Non-Shockable Rhythm |      |             |                   |
|---------|-------------------|-------|-------------|-------------------|----------------------|------|-------------|-------------------|
|         | Mean Weighted mRS | N     | Pr (Target) | Pr (Target & Eff) | Mean Weighted mRS    | N    | Pr (Target) | Pr (Target & Eff) |
| 6 Hour  | 4.85              | 10.3  | 0.004       | 0.000             | 4.85                 | 12.6 | 0.110       | 0.000             |
| 12 Hour | 5.27              | 117.1 | 0.010       | 0.008             | 5.015                | 82.6 | 0.135       | 0.086             |
| 18 Hour | 5.62              | 116.4 | 0.047       | 0.041             | 5.18                 | 64.8 | 0.101       | 0.081             |
| 24 Hour | 5.95              | 211.4 | 0.111       | 0.106             | 5.345                | 84.5 | 0.081       | 0.072             |
| 30 Hour | 6.38              | 220.7 | 0.309       | 0.297             | 5.51                 | 65   | 0.084       | 0.076             |
| 36 Hour | 6.38              | 213.9 | 0.293       | 0.279             | 5.675                | 65.9 | 0.084       | 0.076             |
| 42 Hour | 6.38              | 167.9 | 0.139       | 0.132             | 5.84                 | 65   | 0.121       | 0.110             |
| 48 Hour | 6.38              | 166.7 | 0.068       | 0.063             | 6.14                 | 78.6 | 0.171       | 0.149             |
| 60 Hour | 6.38              | 31.1  | 0.018       | 0.016             | 6.44                 | 17.3 | 0.086       | 0.080             |
| 72 Hour | 6.38              | 3.6   | 0.001       | 0.001             | 7.04                 | 4.6  | 0.028       | 0.028             |
|         |                   | 1259  |             | 0.944             |                      | 541  |             | 0.758             |

4.5.20 90% Shockable: Strong Treatment Effects at 30 Hours with  
10% Non-shockable: Increasing Duration Response (Scenario 32.42.9)

**Table 4.5.20A: Summary Scenario Operating Characteristics**

|                                       | Shockable | Non-Shockable |
|---------------------------------------|-----------|---------------|
| Pr(Select Acceptable Target Duration) | 0.860     | 0.011         |
| Pr(Positive Duration Response)        | 0.940     | 0.575         |
| Pr(Futility)                          | 0.005     | 0.000         |
| Pr(Open 6 Hours)                      | 0.188     | 0.181         |
| Pr(Open 60 Hours)                     | 0.478     | 0.133         |
| Pr(Open 72 Hours)                     | 0.105     | 0.017         |

**Table 4.5.20B: Detailed Scenario Operating Characteristics**

|         | Shockable Rhythm  |       |             |                   | Non-Shockable Rhythm |      |             |                   |
|---------|-------------------|-------|-------------|-------------------|----------------------|------|-------------|-------------------|
|         | Mean Weighted mRS | N     | Pr (Target) | Pr (Target & Eff) | Mean Weighted mRS    | N    | Pr (Target) | Pr (Target & Eff) |
| 6 Hour  | 4.85              | 9.5   | 0.004       | 0.000             | 4.85                 | 1.6  | 0.219       | 0.000             |
| 12 Hour | 5.27              | 130.9 | 0.003       | 0.002             | 5.015                | 34.3 | 0.245       | 0.133             |
| 18 Hour | 5.62              | 131.2 | 0.042       | 0.036             | 5.18                 | 26.2 | 0.126       | 0.091             |
| 24 Hour | 5.95              | 261.9 | 0.091       | 0.083             | 5.345                | 31.3 | 0.093       | 0.080             |
| 30 Hour | 6.38              | 295.1 | 0.325       | 0.310             | 5.51                 | 23.3 | 0.072       | 0.064             |
| 36 Hour | 6.38              | 291.9 | 0.326       | 0.308             | 5.675                | 22.1 | 0.080       | 0.071             |
| 42 Hour | 6.38              | 223.4 | 0.118       | 0.113             | 5.84                 | 19.7 | 0.089       | 0.078             |
| 48 Hour | 6.38              | 218.7 | 0.066       | 0.064             | 6.14                 | 22.4 | 0.065       | 0.050             |
| 60 Hour | 6.38              | 48.5  | 0.024       | 0.024             | 6.44                 | 1.7  | 0.010       | 0.008             |
| 72 Hour | 6.38              | 6.1   | 0.001       | 0.001             | 7.04                 | 0.2  | 0.001       | 0.001             |
|         |                   | 1617  |             | 0.940             |                      | 183  |             | 0.575             |

4.5.21 10% Shockable: Strong Treatment Effects at 30 Hours with  
90% Non-shockable: Large Treatment Effect at 48 (Scenario 32.53.1)

**Table 4.5.21A: Summary Scenario Operating Characteristics**

|                                       | Shockable | Non-Shockable |
|---------------------------------------|-----------|---------------|
| Pr(Select Acceptable Target Duration) | 0.535     | 0.788         |
| Pr(Positive Duration Response)        | 0.774     | 0.996         |
| Pr(Futility)                          | 0.000     | 0.000         |
| Pr(Open 6 Hours)                      | 0.160     | 0.082         |
| Pr(Open 60 Hours)                     | 0.100     | 0.974         |
| Pr(Open 72 Hours)                     | 0.007     | 0.821         |

**Table 4.5.21B: Detailed Scenario Operating Characteristics**

|         | Shockable Rhythm  |       |             |                   | Non-Shockable Rhythm |        |             |                   |
|---------|-------------------|-------|-------------|-------------------|----------------------|--------|-------------|-------------------|
|         | Mean Weighted mRS | N     | Pr (Target) | Pr (Target & Eff) | Mean Weighted mRS    | N      | Pr (Target) | Pr (Target & Eff) |
| 6 Hour  | 4.85              | 1.3   | 0.134       | 0.000             | 4.85                 | 3.6    | 0.001       | 0.000             |
| 12 Hour | 5.27              | 31.4  | 0.165       | 0.126             | 5.20                 | 94.1   | 0.000       | 0.000             |
| 18 Hour | 5.62              | 25.5  | 0.131       | 0.115             | 5.51                 | 65.4   | 0.028       | 0.028             |
| 24 Hour | 5.95              | 32.7  | 0.147       | 0.132             | 5.77                 | 145.5  | 0.035       | 0.035             |
| 30 Hour | 6.38              | 25.4  | 0.170       | 0.158             | 6.08                 | 120.5  | 0.042       | 0.042             |
| 36 Hour | 6.38              | 23.2  | 0.134       | 0.126             | 6.24                 | 172.0  | 0.040       | 0.039             |
| 42 Hour | 6.38              | 19.2  | 0.084       | 0.082             | 6.59                 | 251.2  | 0.082       | 0.082             |
| 48 Hour | 6.38              | 20.8  | 0.034       | 0.032             | 6.90                 | 412.1  | 0.359       | 0.359             |
| 60 Hour | 6.38              | 0.9   | 0.002       | 0.002             | 6.90                 | 260.9  | 0.347       | 0.345             |
| 72 Hour | 6.38              | 0.0   | 0.000       | 0.000             | 6.90                 | 94.1   | 0.066       | 0.066             |
|         |                   | 180.4 |             | 0.773             |                      | 1619.4 |             | 0.996             |



4.5.22 30% Shockable: Strong Treatment Effects at 30 Hours with  
70% Non-shockable: Large Treatment Effect at 48 (Scenario 32.53.3)

**Table 4.5.22A: Summary Scenario Operating Characteristics**

|                                       | Shockable | Non-Shockable |
|---------------------------------------|-----------|---------------|
| Pr(Select Acceptable Target Duration) | 0.734     | 0.813         |
| Pr(Positive Duration Response)        | 0.926     | 0.993         |
| Pr(Futility)                          | 0.001     | 0.002         |
| Pr(Open 6 Hours)                      | 0.280     | 0.098         |
| Pr(Open 60 Hours)                     | 0.271     | 0.957         |
| Pr(Open 72 Hours)                     | 0.031     | 0.739         |

**Table 4.5.22B: Detailed Scenario Operating Characteristics**

|         | Shockable Rhythm  |      |             |                   | Non-Shockable Rhythm |       |             |                   |
|---------|-------------------|------|-------------|-------------------|----------------------|-------|-------------|-------------------|
|         | Mean Weighted mRS | N    | Pr (Target) | Pr (Target & Eff) | Mean Weighted mRS    | N     | Pr (Target) | Pr (Target & Eff) |
| 6 Hour  | 4.85              | 7.9  | 0.042       | 0.000             | 4.85                 | 3.6   | 0.002       | 0.000             |
| 12 Hour | 5.27              | 72.2 | 0.050       | 0.042             | 5.2                  | 83.3  | 0.002       | 0.001             |
| 18 Hour | 5.62              | 64.1 | 0.099       | 0.095             | 5.51                 | 59.4  | 0.017       | 0.017             |
| 24 Hour | 5.95              | 94.5 | 0.141       | 0.137             | 5.77                 | 122.7 | 0.030       | 0.030             |
| 30 Hour | 6.38              | 82.3 | 0.233       | 0.230             | 6.08                 | 104.9 | 0.037       | 0.036             |
| 36 Hour | 6.38              | 78.3 | 0.230       | 0.224             | 6.24                 | 145.5 | 0.054       | 0.054             |
| 42 Hour | 6.38              | 65   | 0.130       | 0.126             | 6.59                 | 201.7 | 0.100       | 0.099             |
| 48 Hour | 6.38              | 67.9 | 0.066       | 0.064             | 6.90                 | 304.6 | 0.389       | 0.388             |
| 60 Hour | 6.38              | 7.7  | 0.009       | 0.009             | 6.90                 | 176.1 | 0.324       | 0.323             |
| 72 Hour | 6.38              | 0.5  | 0.000       | 0.000             | 6.90                 | 57.8  | 0.045       | 0.045             |
|         |                   | 541  |             | 0.926             |                      | 1260  |             | 0.993             |

4.5.23 50% Shockable: Strong Treatment Effects at 30 Hours with  
50% Non-shockable: Large Treatment Effect at 48 (Scenario 32.53.5)

**Table 4.5.23A: Summary Scenario Operating Characteristics**

|                                       | Shockable | Non-Shockable |
|---------------------------------------|-----------|---------------|
| Pr(Select Acceptable Target Duration) | 0.811     | 0.783         |
| Pr(Positive Duration Response)        | 0.961     | 0.978         |
| Pr(Futility)                          | 0.004     | 0.001         |
| Pr(Open 6 Hours)                      | 0.270     | 0.150         |
| Pr(Open 60 Hours)                     | 0.366     | 0.890         |
| Pr(Open 72 Hours)                     | 0.058     | 0.601         |

**Table 4.5.23B: Detailed Scenario Operating Characteristics**

|         | Shockable Rhythm  |       |             |                   | Non-Shockable Rhythm |       |             |                   |
|---------|-------------------|-------|-------------|-------------------|----------------------|-------|-------------|-------------------|
|         | Mean Weighted mRS | N     | Pr (Target) | Pr (Target & Eff) | Mean Weighted mRS    | N     | Pr (Target) | Pr (Target & Eff) |
| 6 Hour  | 4.85              | 10.7  | 0.015       | 0.000             | 4.85                 | 4.8   | 0.004       | 0.000             |
| 12 Hour | 5.27              | 99    | 0.018       | 0.017             | 5.2                  | 71.5  | 0.002       | 0.002             |
| 18 Hour | 5.62              | 93.7  | 0.068       | 0.066             | 5.51                 | 54.5  | 0.027       | 0.026             |
| 24 Hour | 5.95              | 153.4 | 0.112       | 0.110             | 5.77                 | 101.8 | 0.033       | 0.032             |
| 30 Hour | 6.38              | 147.5 | 0.283       | 0.276             | 6.08                 | 89    | 0.057       | 0.054             |
| 36 Hour | 6.38              | 141.9 | 0.272       | 0.265             | 6.24                 | 114.4 | 0.068       | 0.068             |
| 42 Hour | 6.38              | 115.4 | 0.144       | 0.142             | 6.59                 | 143.8 | 0.133       | 0.130             |
| 48 Hour | 6.38              | 117.5 | 0.072       | 0.070             | 6.90                 | 197.2 | 0.390       | 0.384             |
| 60 Hour | 6.38              | 18.7  | 0.014       | 0.014             | 6.90                 | 96.3  | 0.260       | 0.256             |
| 72 Hour | 6.38              | 1.6   | 0.000       | 0.000             | 6.90                 | 27.3  | 0.026       | 0.026             |
|         |                   | 899   |             | 0.961             |                      | 901   |             | 0.978             |

4.5.24 70% Shockable: Strong Treatment Effects at 30 Hours with  
30% Non-shockable: Large Treatment Effect at 48 (Scenario 32.53.7)

**Table 4.5.24A: Summary Scenario Operating Characteristics**

|                                       | Shockable | Non-Shockable |
|---------------------------------------|-----------|---------------|
| Pr(Select Acceptable Target Duration) | 0.843     | 0.661         |
| Pr(Positive Duration Response)        | 0.973     | 0.932         |
| Pr(Futility)                          | 0.006     | 0.000         |
| Pr(Open 6 Hours)                      | 0.239     | 0.191         |
| Pr(Open 60 Hours)                     | 0.408     | 0.714         |
| Pr(Open 72 Hours)                     | 0.079     | 0.326         |

**Table 4.5.24B: Detailed Scenario Operating Characteristics**

|         | Shockable Rhythm  |       |             |                   | Non-Shockable Rhythm |      |             |                   |
|---------|-------------------|-------|-------------|-------------------|----------------------|------|-------------|-------------------|
|         | Mean Weighted mRS | N     | Pr (Target) | Pr (Target & Eff) | Mean Weighted mRS    | N    | Pr (Target) | Pr (Target & Eff) |
| 6 Hour  | 4.85              | 10.7  | 0.005       | 0.000             | 4.85                 | 4.7  | 0.019       | 0.000             |
| 12 Hour | 5.27              | 118.6 | 0.008       | 0.006             | 5.2                  | 59   | 0.023       | 0.018             |
| 18 Hour | 5.62              | 118.4 | 0.054       | 0.052             | 5.51                 | 48   | 0.042       | 0.038             |
| 24 Hour | 5.95              | 212.6 | 0.117       | 0.116             | 5.77                 | 75.3 | 0.067       | 0.062             |
| 30 Hour | 6.38              | 217   | 0.301       | 0.295             | 6.08                 | 63.3 | 0.078       | 0.074             |
| 36 Hour | 6.38              | 211.8 | 0.299       | 0.293             | 6.24                 | 71.7 | 0.104       | 0.097             |
| 42 Hour | 6.38              | 167.2 | 0.126       | 0.122             | 6.59                 | 79.6 | 0.173       | 0.169             |
| 48 Hour | 6.38              | 166.6 | 0.068       | 0.067             | 6.90                 | 99   | 0.352       | 0.334             |
| 60 Hour | 6.38              | 31.9  | 0.021       | 0.021             | 6.90                 | 34.1 | 0.136       | 0.132             |
| 72 Hour | 6.38              | 3.4   | 0.001       | 0.001             | 6.90                 | 7    | 0.007       | 0.007             |
|         |                   | 1258  |             | 0.973             |                      | 541  |             | 0.932             |

4.5.25 90% Shockable: Strong Treatment Effects at 30 Hours with  
10% Non-shockable: Large Treatment Effect at 48 (Scenario 32.53.9)

| <b>Table 4.5.25A: Summary Scenario Operating Characteristics</b> |                  |                      |
|------------------------------------------------------------------|------------------|----------------------|
|                                                                  | <b>Shockable</b> | <b>Non-Shockable</b> |
| <b>Pr(Select Acceptable Target Duration)</b>                     | <b>0.879</b>     | <b>0.310</b>         |
| Pr(Positive Duration Response)                                   | 0.951            | 0.742                |
| Pr(Futility)                                                     | 0.003            | 0.000                |
| Pr(Open 6 Hours)                                                 | 0.201            | 0.130                |
| Pr(Open 60 Hours)                                                | 0.446            | 0.258                |
| Pr(Open 72 Hours)                                                | 0.094            | 0.038                |

**Table 4.5.25B: Detailed Scenario Operating Characteristics**

|                | <b>Shockable Rhythm</b>  |              |                    |                              | <b>Non-Shockable Rhythm</b> |             |                    |                              |
|----------------|--------------------------|--------------|--------------------|------------------------------|-----------------------------|-------------|--------------------|------------------------------|
|                | <b>Mean Weighted mRS</b> | <b>N</b>     | <b>Pr (Target)</b> | <b>Pr (Target &amp; Eff)</b> | <b>Mean Weighted mRS</b>    | <b>N</b>    | <b>Pr (Target)</b> | <b>Pr (Target &amp; Eff)</b> |
| 6 Hour         | 4.85                     | 10.0         | 0.005              | 0.000                        | 4.85                        | 1.0         | 0.112              | 0.000                        |
| 12 Hour        | 5.27                     | 132.0        | 0.003              | 0.002                        | 5.20                        | 28.7        | 0.129              | 0.085                        |
| 18 Hour        | 5.62                     | 134.4        | 0.037              | 0.036                        | 5.51                        | 23.2        | 0.110              | 0.084                        |
| <b>24 Hour</b> | <b>5.95</b>              | <b>266.8</b> | <b>0.100</b>       | <b>0.094</b>                 | 5.77                        | 30.8        | 0.118              | 0.104                        |
| <b>30 Hour</b> | <b>6.38</b>              | <b>299.5</b> | <b>0.328</b>       | <b>0.315</b>                 | 6.08                        | 24.3        | 0.110              | 0.101                        |
| <b>36 Hour</b> | <b>6.38</b>              | <b>292.8</b> | <b>0.320</b>       | <b>0.308</b>                 | 6.24                        | 23.9        | 0.111              | 0.100                        |
| <b>42 Hour</b> | <b>6.38</b>              | <b>219.8</b> | <b>0.131</b>       | <b>0.123</b>                 | <b>6.59</b>                 | <b>22.1</b> | <b>0.165</b>       | <b>0.148</b>                 |
| 48 Hour        | 6.38                     | 213.5        | 0.056              | 0.054                        | <b>6.90</b>                 | <b>24.7</b> | <b>0.128</b>       | <b>0.106</b>                 |
| 60 Hour        | 6.38                     | 44.1         | 0.0                | 0.018                        | <b>6.90</b>                 | <b>2.9</b>  | <b>0.017</b>       | <b>0.015</b>                 |
| 72 Hour        | 6.38                     | 5.4          | 0.0                | 0.000                        | 6.90                        | 0.2         | 0.000              | 0.000                        |
|                |                          | 1618.3       |                    | 0.950                        |                             | 181.8       |                    | 0.743                        |

## 4.6 Half-Null Scenarios

In this section we present scenarios in which one of the two rhythm types has no benefit, but the other rhythm type does have a benefit. In each of these cases we assume a 50% prevalence rate for each rhythm type. See Section 4.5 for a combining of the strong effect at 30-hours with a null scenario and varying rates in each rhythm type. We pair the null scenario (for non-shockable) with a scenario of positive effect in the shockable rhythm type. We summarize the operating characteristics for each run in Table 4.6 and present a summary of each scenario run in the following subsections.

An important note is that we do not view these scenarios as being a part of the null hypothesis for type I error control. For the type I error control we assume that each rhythm type must have no benefit of increasing durations. We say this because any analysis combining data across rhythm types would certainly claim a benefit on the population as a whole. The operating characteristics demonstrate much better behavior than a pooling across rhythm types, but does not claim control of type I error for each subpopulation.

Table 4.6: The summary operating characteristics for various combinations of different treatment effects and a null effect. The # column refers to the labeling of each scenario for the back-up software output. The Name column refers to the scenario name presented throughout Section 4. The operating characteristics presented for each rhythm type are N: the mean sample size; and Positive: The proportion of trials with a statistically significant positive trend is also reported.

| #  | Name       | N     | Positive | # | Name | N     | Positive |
|----|------------|-------|----------|---|------|-------|----------|
| 21 | Small 18   | 933.5 | .347     | 1 | Null | 865.2 | .110     |
| 32 | Strong 30  | 941.7 | .748     | 1 | Null | 858.1 | .259     |
| 41 | U-Shaped   | 935.8 | .476     | 1 | Null | 862.6 | .134     |
| 42 | Increasing | 936.5 | .602     | 1 | Null | 862.1 | .254     |
| 53 | Large 48   | 941.5 | .919     | 1 | Null | 858.5 | .359     |

4.6.1 *Shockable: Small Treatment Effects at 18 Hours with  
Non-shockable: Null Treatment Effect (Scenario 21.1.5)*

| <b>Table 4.6.1A: Summary Scenario Operating Characteristics</b> |                  |                      |
|-----------------------------------------------------------------|------------------|----------------------|
|                                                                 | <b>Shockable</b> | <b>Non-Shockable</b> |
| <b>Pr(Select Acceptable Target Duration)</b>                    | <b>0.671</b>     | <b>0.887</b>         |
| Pr(Positive Duration Response)                                  | 0.347            | 0.110                |
| Pr(Futility)                                                    | 0.026            | 0.187                |
| Pr(Open 6 Hours)                                                | 0.531            | 0.784                |
| Pr(Open 60 Hours)                                               | 0.078            | 0.044                |
| Pr(Open 72 Hours)                                               | 0.009            | 0.002                |

**Table 4.6.1B: Detailed Scenario Operating Characteristics**

|         | <b>Shockable Rhythm</b>  |              |                    |                              | <b>Non-Shockable Rhythm</b> |              |                    |                              |
|---------|--------------------------|--------------|--------------------|------------------------------|-----------------------------|--------------|--------------------|------------------------------|
|         | <b>Mean Weighted mRS</b> | <b>N</b>     | <b>Pr (Target)</b> | <b>Pr (Target &amp; Eff)</b> | <b>Mean Weighted mRS</b>    | <b>N</b>     | <b>Pr (Target)</b> | <b>Pr (Target &amp; Eff)</b> |
| 6 Hour  | 4.85                     | 30.2         | 0.085              | 0.000                        | <i>4.85</i>                 | <i>73.8</i>  | <i>0.435</i>       | <i>0.000</i>                 |
| 12 Hour | 5.39                     | 164.5        | 0.146              | 0.024                        | <i>4.85</i>                 | <i>196.0</i> | <i>0.364</i>       | <i>0.035</i>                 |
| 18 Hour | <i>5.93</i>              | <i>166.0</i> | <i>0.370</i>       | <i>0.141</i>                 | <i>4.85</i>                 | <i>131.2</i> | <i>0.088</i>       | <i>0.029</i>                 |
| 24 Hour | <i>5.93</i>              | <i>180.3</i> | <i>0.221</i>       | <i>0.094</i>                 | 4.85                        | 139.5        | 0.045              | 0.016                        |
| 30 Hour | <i>5.93</i>              | <i>117.2</i> | <i>0.080</i>       | <i>0.041</i>                 | 4.85                        | 91.3         | 0.022              | 0.012                        |
| 36 Hour | 5.93                     | 97.3         | 0.042              | 0.020                        | 4.85                        | 80.1         | 0.019              | 0.008                        |
| 42 Hour | 5.93                     | 80.8         | 0.032              | 0.017                        | 4.85                        | 67.5         | 0.017              | 0.005                        |
| 48 Hour | 5.93                     | 93.0         | 0.020              | 0.008                        | 4.85                        | 83.7         | 0.010              | 0.004                        |
| 60 Hour | 5.93                     | 3.9          | 0.004              | 0.002                        | 4.85                        | 2.1          | 0.000              | 0.000                        |
| 72 Hour | 5.93                     | 0.3          | 0.000              | 0.000                        | 4.85                        | 0.1          | 0.000              | 0.000                        |
|         |                          | 933.5        |                    | 0.347                        |                             | 865.2        |                    | 0.110                        |

4.6.2 *Shockable: Strong Treatment Effects at 30 Hours with  
Non-shockable: Null Treatment Effect (Scenario 32.1.5)*

|                                              | <b>Shockable</b> | <b>Non-Shockable</b> |
|----------------------------------------------|------------------|----------------------|
| <b>Pr(Select Acceptable Target Duration)</b> | <b>0.824</b>     | <b>0.889</b>         |
| Pr(Positive Duration Response)               | 0.748            | 0.259                |
| Pr(Futility)                                 | 0.003            | 0.191                |
| Pr(Open 6 Hours)                             | 0.264            | 0.774                |
| Pr(Open 60 Hours)                            | 0.349            | 0.043                |
| Pr(Open 72 Hours)                            | 0.054            | 0.004                |

**Table 4.6.2B: Detailed Scenario Operating Characteristics**

|         | <b>Shockable Rhythm</b>          |              |                        |                                      | <b>Non-Shockable Rhythm</b>      |              |                        |                                      |
|---------|----------------------------------|--------------|------------------------|--------------------------------------|----------------------------------|--------------|------------------------|--------------------------------------|
|         | <b>Mean<br/>Weighted<br/>mRS</b> | <b>N</b>     | <b>Pr<br/>(Target)</b> | <b>Pr<br/>(Target<br/>&amp; Eff)</b> | <b>Mean<br/>Weighted<br/>mRS</b> | <b>N</b>     | <b>Pr<br/>(Target)</b> | <b>Pr<br/>(Target<br/>&amp; Eff)</b> |
| 6 Hour  | 4.85                             | 10.6         | 0.016                  | 0.000                                | <i>4.85</i>                      | <i>72.6</i>  | <i>0.423</i>           | <i>0.000</i>                         |
| 12 Hour | 5.27                             | 100.5        | 0.020                  | 0.006                                | <i>4.85</i>                      | <i>194.4</i> | <i>0.390</i>           | <i>0.136</i>                         |
| 18 Hour | 5.62                             | 97.1         | 0.062                  | 0.036                                | <i>4.85</i>                      | <i>129.6</i> | <i>0.076</i>           | <i>0.041</i>                         |
| 24 Hour | <i>5.95</i>                      | <i>160.1</i> | <i>0.112</i>           | <i>0.080</i>                         | 4.85                             | 138.6        | 0.054                  | 0.039                                |
| 30 Hour | <i>6.38</i>                      | <i>157.5</i> | <i>0.313</i>           | <i>0.241</i>                         | 4.85                             | 90.7         | 0.020                  | 0.014                                |
| 36 Hour | <i>6.38</i>                      | <i>152.4</i> | <i>0.282</i>           | <i>0.229</i>                         | 4.85                             | 79.6         | 0.015                  | 0.011                                |
| 42 Hour | <i>6.38</i>                      | <i>122.2</i> | <i>0.117</i>           | <i>0.094</i>                         | 4.85                             | 67           | 0.012                  | 0.010                                |
| 48 Hour | 6.38                             | 120.8        | 0.064                  | 0.050                                | 4.85                             | 83.4         | 0.009                  | 0.006                                |
| 60 Hour | 6.38                             | 18.9         | 0.013                  | 0.010                                | 4.85                             | 2            | 0.002                  | 0.001                                |
| 72 Hour | 6.38                             | 1.6          | 0.002                  | 0.001                                | 4.85                             | 0.1          | 0.000                  | 0.000                                |
|         |                                  | 942          |                        | 0.748                                |                                  | 858          |                        | 0.259                                |

4.6.3 *Shockable: U-Shaped Duration Response*  
*Non-shockable: Null Treatment Effect (Scenario 41.1.5)*

**Table 4.6.3A: Summary Scenario Operating Characteristics**

|                                       | <b>Shockable</b> | <b>Non-Shockable</b> |
|---------------------------------------|------------------|----------------------|
| Pr(Select Acceptable Target Duration) | 0.864            | 0.888                |
| Pr(Positive Duration Response)        | 0.476            | 0.134                |
| Pr(Futility)                          | 0.018            | 0.202                |
| Pr(Open 6 Hours)                      | 0.511            | 0.790                |
| Pr(Open 60 Hours)                     | 0.008            | 0.042                |
| Pr(Open 72 Hours)                     | 0.000            | 0.003                |

**Table 4.6.3B: Detailed Scenario Operating Characteristics**

|         | <b>Shockable Rhythm</b>  |          |                    |                              | <b>Non-Shockable Rhythm</b> |          |                    |                              |
|---------|--------------------------|----------|--------------------|------------------------------|-----------------------------|----------|--------------------|------------------------------|
|         | <b>Mean Weighted mRS</b> | <b>N</b> | <b>Pr (Target)</b> | <b>Pr (Target &amp; Eff)</b> | <b>Mean Weighted mRS</b>    | <b>N</b> | <b>Pr (Target)</b> | <b>Pr (Target &amp; Eff)</b> |
| 6 Hour  | 4.85                     | 25.9     | 0.042              | 0.000                        | 4.85                        | 75       | 0.437              | 0.000                        |
| 12 Hour | 5.62                     | 157.2    | 0.089              | 0.024                        | 4.85                        | 195.4    | 0.369              | 0.054                        |
| 18 Hour | 5.95                     | 161      | 0.217              | 0.104                        | 4.85                        | 130.3    | 0.082              | 0.032                        |
| 24 Hour | 6.38                     | 211.5    | 0.374              | 0.196                        | 4.85                        | 139.1    | 0.047              | 0.022                        |
| 30 Hour | 6.38                     | 148.4    | 0.222              | 0.123                        | 4.85                        | 91.1     | 0.026              | 0.013                        |
| 36 Hour | 6.38                     | 102.7    | 0.051              | 0.027                        | 4.85                        | 79.4     | 0.015              | 0.007                        |
| 42 Hour | 5.95                     | 61.8     | 0.003              | 0.002                        | 4.85                        | 67       | 0.015              | 0.005                        |
| 48 Hour | 5.62                     | 67.2     | 0.001              | 0.000                        | 4.85                        | 83.4     | 0.009              | 0.000                        |
| 60 Hour | 4.85                     | 0.2      | 0.000              | 0.000                        | 4.85                        | 1.8      | 0.000              | 0.000                        |
| 72 Hour | 4.25                     | 0        | 0.000              | 0.000                        | 4.85                        | 0.1      | 0.000              | 0.000                        |
|         |                          | 936      |                    | 0.476                        |                             | 862      |                    | 0.134                        |



4.6.4 *Shockable: Increasing Duration Response*  
*Non-shockable: Null Treatment Effect (Scenario 42.1.5)*

**Table 4.6.4A: Summary Scenario Operating Characteristics**

|                                              | <b>Shockable</b> | <b>Non-Shockable</b> |
|----------------------------------------------|------------------|----------------------|
| <b>Pr(Select Acceptable Target Duration)</b> | <b>0.302</b>     | <b>0.897</b>         |
| Pr(Positive Duration Response)               | 0.602            | 0.254                |
| Pr(Futility)                                 | 0.018            | 0.185                |
| Pr(Open 6 Hours)                             | 0.347            | 0.770                |
| Pr(Open 60 Hours)                            | 0.604            | 0.027                |
| Pr(Open 72 Hours)                            | 0.329            | 0.000                |

**Table 4.6.4B: Detailed Scenario Operating Characteristics**

|         | <b>Shockable Rhythm</b>  |             |                    |                              | <b>Non-Shockable Rhythm</b> |              |                    |                              |
|---------|--------------------------|-------------|--------------------|------------------------------|-----------------------------|--------------|--------------------|------------------------------|
|         | <b>Mean Weighted mRS</b> | <b>N</b>    | <b>Pr (Target)</b> | <b>Pr (Target &amp; Eff)</b> | <b>Mean Weighted mRS</b>    | <b>N</b>     | <b>Pr (Target)</b> | <b>Pr (Target &amp; Eff)</b> |
| 6 Hour  | 4.85                     | 20.1        | 0.054              | 0.000                        | <i>4.85</i>                 | <i>72.4</i>  | <i>0.426</i>       | <i>0.000</i>                 |
| 12 Hour | 5.015                    | 120.9       | 0.070              | 0.008                        | <i>4.85</i>                 | <i>196.5</i> | <i>0.388</i>       | <i>0.136</i>                 |
| 18 Hour | 5.18                     | 94.9        | 0.062              | 0.028                        | <i>4.85</i>                 | <i>130.9</i> | <i>0.083</i>       | <i>0.045</i>                 |
| 24 Hour | 5.345                    | 130.4       | 0.061              | 0.024                        | 4.85                        | 139.2        | 0.046              | 0.032                        |
| 30 Hour | 5.51                     | 104.1       | 0.076              | 0.047                        | 4.85                        | 91.4         | 0.022              | 0.016                        |
| 36 Hour | 5.675                    | 112.7       | 0.076              | 0.049                        | 4.85                        | 79.9         | 0.011              | 0.008                        |
| 42 Hour | 5.84                     | 118.7       | 0.110              | 0.065                        | 4.85                        | 67.1         | 0.016              | 0.012                        |
| 48 Hour | 6.14                     | 150.6       | 0.190              | 0.114                        | 4.85                        | 83.3         | 0.006              | 0.005                        |
| 60 Hour | <i>6.44</i>              | <i>57.4</i> | <i>0.162</i>       | <i>0.132</i>                 | 4.85                        | 1.3          | 0.000              | 0.000                        |
| 72 Hour | <i>7.04</i>              | <i>26.8</i> | <i>0.140</i>       | <i>0.136</i>                 | 4.85                        | 0            | 0.000              | 0.000                        |
|         |                          | 937         |                    | 0.602                        |                             | 862          |                    | 0.254                        |

4.6.5 Shockable: Large Treatment Effect at 48 Hours  
 Non-shockable: Null Treatment Effect (Scenario 53.1.5)

**Table 4.6.5A: Summary Scenario Operating Characteristics**

|                                       | Shockable | Non-Shockable |
|---------------------------------------|-----------|---------------|
| Pr(Select Acceptable Target Duration) | 0.792     | 0.898         |
| Pr(Positive Duration Response)        | 0.919     | 0.359         |
| Pr(Futility)                          | 0.001     | 0.182         |
| Pr(Open 6 Hours)                      | 0.158     | 0.784         |
| Pr(Open 60 Hours)                     | 0.901     | 0.034         |
| Pr(Open 72 Hours)                     | 0.600     | 0.002         |

**Table 4.6.5B: Detailed Scenario Operating Characteristics**

|         | Shockable Rhythm  |       |             |                   | Non-Shockable Rhythm |       |             |                   |
|---------|-------------------|-------|-------------|-------------------|----------------------|-------|-------------|-------------------|
|         | Mean Weighted mRS | N     | Pr (Target) | Pr (Target & Eff) | Mean Weighted mRS    | N     | Pr (Target) | Pr (Target & Eff) |
| 6 Hour  | 4.85              | 5.3   | 0.003       | 0.000             | 4.85                 | 73.4  | 0.445       | 0.000             |
| 12 Hour | 5.2               | 74.2  | 0.004       | 0.002             | 4.85                 | 194.8 | 0.362       | 0.202             |
| 18 Hour | 5.51              | 58.1  | 0.017       | 0.014             | 4.85                 | 130.8 | 0.091       | 0.070             |
| 24 Hour | 5.77              | 105.1 | 0.039       | 0.036             | 4.85                 | 138.8 | 0.041       | 0.032             |
| 30 Hour | 6.08              | 92.5  | 0.042       | 0.035             | 4.85                 | 90.8  | 0.025       | 0.021             |
| 36 Hour | 6.24              | 119.2 | 0.068       | 0.062             | 4.85                 | 79    | 0.013       | 0.012             |
| 42 Hour | 6.59              | 150.4 | 0.140       | 0.128             | 4.85                 | 66.3  | 0.014       | 0.013             |
| 48 Hour | 6.9               | 203.7 | 0.387       | 0.354             | 4.85                 | 82.8  | 0.008       | 0.006             |
| 60 Hour | 6.9               | 102.3 | 0.265       | 0.256             | 4.85                 | 1.7   | 0.002       | 0.002             |
| 72 Hour | 6.9               | 30.7  | 0.034       | 0.034             | 4.85                 | 0.1   | 0.000       | 0.000             |
|         |                   | 942   |             | 0.919             |                      | 859   |             | 0.359             |

## 4.7 Sample Size Justification

In order to determine the maximum sample size for this trial, we considered power for various scenarios across a range of total sample sizes from 1500 to 2300 patients. We considered power for selecting a clinically acceptable duration and for determining if cooling is effective. We primarily examined three reference scenarios where the maximum treatment effect was the same in each scenario, but the treatment effect plateaus in a different location.

This section reviews each of these simulated scenarios through the sample size range. At the end of this section, we then graphically illustrate the effect of varying sample size from 1,500 to 2,300 on the probability of identifying a positive duration response and the probability of detecting the best duration in simulations of these 3 reference scenarios, and two illustrative scenarios of affect sizes smaller than those the trial is designed to detect.

In Scenario 1 below, the target duration is the 18-hour duration arm. This corresponds to the scenario described in section 4.2.7 above. In Scenario 2 below, the target duration is the 30-hour duration arm. This corresponds to the scenario described in section 4.2.2 above. In Scenario 3, the target duration is the 48-hour duration arm, corresponding to section 4.4.5. The scenario in terms of the mean weighted mRS across each arm is shown with the clinically acceptable durations in red italics. Results for the total sample size of 1800 patients are in bold.

| Scenario 1<br>(Both Rhythm Types) |                      | Total<br>Sample<br>Size | Power                                |                                   |
|-----------------------------------|----------------------|-------------------------|--------------------------------------|-----------------------------------|
|                                   |                      |                         | Clinically<br>Acceptable<br>Duration | Positive<br>Duration-Res<br>ponse |
| Arm                               | Mean Weighted<br>mRS | 1500                    | 0.762                                | 0.694                             |
|                                   |                      | 1600                    | 0.774                                | 0.709                             |
|                                   |                      | 1700                    | 0.780                                | 0.741                             |
|                                   |                      | <b>1800</b>             | <b>0.797</b>                         | <b>0.776</b>                      |
| 6 Hour                            | 4.85                 | 1900                    | 0.800                                | 0.798                             |
| 12 Hour                           | 5.615                | 2000                    | 0.815                                | 0.808                             |
| <i>18 Hour</i>                    | <i>6.38</i>          | 2100                    | 0.820                                | 0.819                             |
| <i>24 Hour</i>                    | <i>6.38</i>          | 2200                    | 0.826                                | 0.838                             |
| <i>30 Hour</i>                    | <i>6.38</i>          | 2300                    | 0.839                                | 0.856                             |
| 36 Hour                           | 6.38                 |                         |                                      |                                   |
| 42 Hour                           | 6.38                 |                         |                                      |                                   |
| 48 Hour                           | 6.38                 |                         |                                      |                                   |
| 60 Hour                           | 6.38                 |                         |                                      |                                   |
| 72 Hour                           | 6.38                 |                         |                                      |                                   |

| Scenario 2<br>(Both Rhythm Types) |                      | Total<br>Sample<br>Size | Power                                |                                   |
|-----------------------------------|----------------------|-------------------------|--------------------------------------|-----------------------------------|
|                                   |                      |                         | Clinically<br>Acceptable<br>Duration | Positive<br>Duration-Res<br>ponse |
| Arm                               | Mean Weighted<br>mRS | 1500                    | 0.750                                | 0.894                             |
|                                   |                      | 1600                    | 0.768                                | 0.909                             |
|                                   |                      | 1700                    | 0.771                                | 0.924                             |
|                                   |                      | <b>1800</b>             | <b>0.781</b>                         | <b>0.937</b>                      |
| 6 Hour                            | 4.85                 | 1900                    | 0.785                                | 0.946                             |
| 12 Hour                           | 5.27                 | 2000                    | 0.793                                | 0.952                             |
| 18 Hour                           | 5.62                 | 2100                    | 0.803                                | 0.952                             |
| <i>24 Hour</i>                    | <i>5.95</i>          | 2200                    | 0.814                                | 0.963                             |
| <i>30 Hour</i>                    | <i>6.38</i>          | 2300                    | 0.818                                | 0.970                             |
| <i>36 Hour</i>                    | <i>6.38</i>          |                         |                                      |                                   |
| <i>42 Hour</i>                    | <i>6.38</i>          |                         |                                      |                                   |
| 48 Hour                           | 6.38                 |                         |                                      |                                   |
| 60 Hour                           | 6.38                 |                         |                                      |                                   |
| 72 Hour                           | 6.38                 |                         |                                      |                                   |

| Scenario 3<br>(Both Rhythm Types) |                      | Total<br>Sample<br>Size | Power                                |                                   |
|-----------------------------------|----------------------|-------------------------|--------------------------------------|-----------------------------------|
|                                   |                      |                         | Clinically<br>Acceptable<br>Duration | Positive<br>Duration-Res<br>ponse |
| Arm                               | Mean Weighted<br>mRS | 1500                    | 0.717                                | 0.935                             |
|                                   |                      | 1600                    | 0.709                                | 0.939                             |
|                                   |                      | 1700                    | 0.726                                | 0.951                             |
|                                   |                      | <b>1800</b>             | <b>0.718</b>                         | <b>0.959</b>                      |
| 6 Hour                            | 4.85                 | 1900                    | 0.728                                | 0.966                             |
| 12 Hour                           | 5.06                 | 2000                    | 0.721                                | 0.975                             |
| 18 Hour                           | 5.19                 | 2100                    | 0.708                                | 0.977                             |
| 24 Hour                           | 5.49                 | 2200                    | 0.721                                | 0.983                             |
| 30 Hour                           | 5.79                 | 2300                    | 0.712                                | 0.978                             |
| <i>36 Hour</i>                    | <i>6.09</i>          |                         |                                      |                                   |
| <i>42 Hour</i>                    | <i>6.21</i>          |                         |                                      |                                   |
| <i>48 Hour</i>                    | <i>6.38</i>          |                         |                                      |                                   |
| <i>60 Hour</i>                    | <i>6.38</i>          |                         |                                      |                                   |
| 72 Hour                           | 6.38                 |                         |                                      |                                   |

Power is high for both components of the primary analysis across the range of sample sizes in each scenario above. As the total number of patients increase, power tends to increase, but the gains in power are small. For example, in scenario 3, power is very similar for both components of the primary analysis across the range of sample sizes. In scenario 2, all sample sizes provided at least 80% power for the component of determining a positive duration response. The sample size of 1800 patients was selected to balance the trade-off

between additional patients and the correspondingly small increase in power in these scenarios.

Additional simulation results showed that this choice of sample size would perform well in scenarios where the treatment effect is smaller. Scenarios 4 and 5 below show the power for both components of the primary endpoint analysis for two such scenarios.

| Scenario 4<br>(Both Rhythm Types) |                      | Total<br>Sample<br>Size | Power                                |                                   |
|-----------------------------------|----------------------|-------------------------|--------------------------------------|-----------------------------------|
|                                   |                      |                         | Clinically<br>Acceptable<br>Duration | Positive<br>Duration-Res<br>ponse |
| Arm                               | Mean Weighted<br>mRS | 1500                    | 0.637                                | 0.657                             |
|                                   |                      | 1600                    | 0.648                                | 0.687                             |
|                                   |                      | 1700                    | 0.653                                | 0.723                             |
|                                   |                      | <b>1800</b>             | <b>0.662</b>                         | <b>0.746</b>                      |
| 6 Hour                            | 4.85                 | 1900                    | 0.660                                | 0.749                             |
| 12 Hour                           | 5.12                 | 2000                    | 0.680                                | 0.800                             |
| 18 Hour                           | 5.39                 | 2100                    | 0.682                                | 0.797                             |
| <i>24 Hour</i>                    | <i>5.66</i>          | 2200                    | 0.687                                | 0.822                             |
| <i>30 Hour</i>                    | <i>5.93</i>          | 2300                    | 0.690                                | 0.816                             |
| <i>36 Hour</i>                    | <i>5.93</i>          |                         |                                      |                                   |
| <i>42 Hour</i>                    | <i>5.93</i>          |                         |                                      |                                   |
| 48 Hour                           | 5.93                 |                         |                                      |                                   |
| 60 Hour                           | 5.93                 |                         |                                      |                                   |
| 72 Hour                           | 5.93                 |                         |                                      |                                   |

| Scenario 5<br>(Both Rhythm Types) |                      | Total<br>Sample<br>Size | Power                                |                                   |
|-----------------------------------|----------------------|-------------------------|--------------------------------------|-----------------------------------|
|                                   |                      |                         | Clinically<br>Acceptable<br>Duration | Positive<br>Duration-Res<br>ponse |
| Arm                               | Mean Weighted<br>mRS | 1500                    | 0.607                                | 0.464                             |
|                                   |                      | 1600                    | 0.622                                | 0.476                             |
|                                   |                      | 1700                    | 0.654                                | 0.522                             |
|                                   |                      | <b>1800</b>             | <b>0.640</b>                         | <b>0.552</b>                      |
| 6 Hour                            | 4.85                 | 1900                    | 0.670                                | 0.566                             |
| 12 Hour                           | 5.39                 | 2000                    | 0.674                                | 0.579                             |
| <i>18 Hour</i>                    | <i>5.93</i>          | 2100                    | 0.682                                | 0.599                             |
| <i>24 Hour</i>                    | <i>5.93</i>          | 2200                    | 0.687                                | 0.619                             |
| <i>30 Hour</i>                    | <i>5.93</i>          | 2300                    | 0.711                                | 0.652                             |
| 36 Hour                           | 5.93                 |                         |                                      |                                   |
| 42 Hour                           | 5.93                 |                         |                                      |                                   |
| 48 Hour                           | 5.93                 |                         |                                      |                                   |
| 60 Hour                           | 5.93                 |                         |                                      |                                   |
| 72 Hour                           | 5.93                 |                         |                                      |                                   |

Power is lower for both components of the primary analysis in scenarios 4 and 5 than scenarios 1, 2, and 3 described above because the maximum treatment effect is smaller. In Scenario 5, 1800 patients provides 64% power for selecting a clinically acceptable duration and 55% power for showing a positive duration-response curve. However, this is a challenging scenario for power regardless of the maximum sample size.

This figure illustrates data from the prior tables. It shows the effect of varying sample size from 1,500 to 2,300 on the probability of identifying a positive duration response and the probability of detecting the best duration in simulations in 3 reference scenarios with strong treatment effects, and two illustrative scenarios with weak treatment effects.

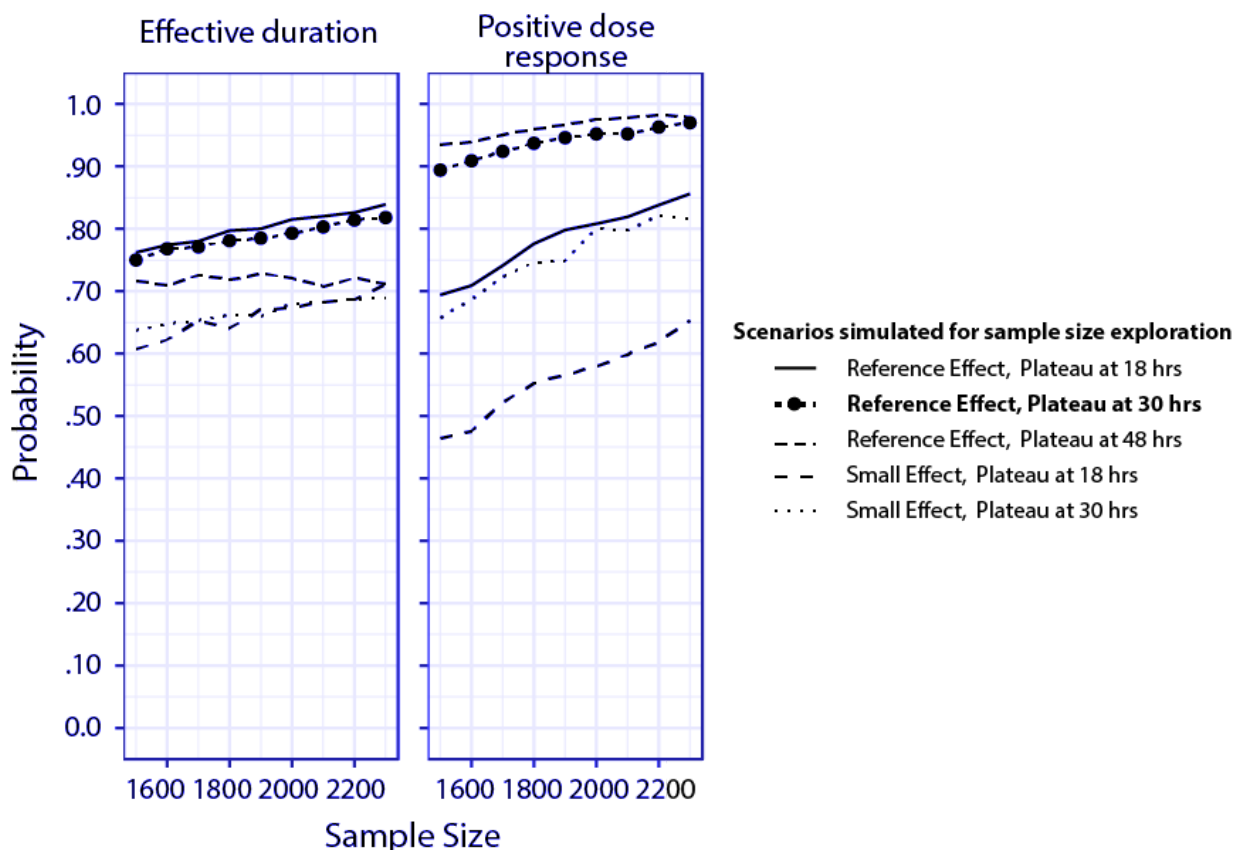

The 3 reference scenarios plateau at 18, 30, or 48 hours. In the middle reference scenario, a sample size of 1800 provides a probability of 0.94 for identifying a positive duration response and 0.78 for correctly identifying the shortest effective duration. In general, it is harder to identify the positive duration response in early plateau scenarios because less of the curve is positive. In the early (18 hour) plateau reference scenario, a sample size of 1800 is the minimum required to provide a probability of 0.78 for identifying a positive duration response and 0.80 for correctly identifying the shortest effective duration. In general it is harder to detect the best duration, at which the treatment effect has plateaued, in late plateau scenarios, because there are fewer data at the plateau. The trial is not designed to detect the small treatment effects, but still frequently identifies these.

## 4.8 Simulating Virtual Subjects

In order to simulate the design we need to create a methodology for simulating individual subjects, including their longitudinal results. These assumptions do not affect the analysis described above and are only made to simulate virtual subjects.

The approach to simulate a subject is to simulate their 90-day mRS outcome, then conditional on this value simulate their 30-day mRS outcome. This reverse order approach allows the probabilities of the 90-day mRS outcomes to be set explicitly, and the truth of the durations to be controlled easier.

In order to simulate subjects a probability vector for each of the 90-day outcomes is assumed. Let the probability of the 7 outcomes be  $p_0, \dots, p_6$ . The true assumed mean weight for the treatment arm is

$$\sum_{m=0}^6 p_m W(m)$$

The design uses the 30-day mRS outcome in the longitudinal model. The following probabilities are used to simulate the 30-day mRS outcome (columns) conditional on the 90-day mRS outcome (row).

|   |     |     |     |     |     |     |    |
|---|-----|-----|-----|-----|-----|-----|----|
|   | 0   | 1   | 2   | 3   | 4   | 5   | 6  |
| 0 | .3  | .3  | .2  | .15 | .04 | .01 | 0  |
| 1 | .1  | .5  | .2  | .15 | .04 | .01 | 0  |
| 2 | .05 | .05 | .5  | .25 | .14 | .01 | 0  |
| 3 | .01 | .05 | .05 | .5  | .35 | .04 | 0  |
| 4 | .01 | .01 | .01 | .07 | .7  | .2  | 0  |
| 5 | .01 | .01 | .01 | .01 | .26 | .7  | 0  |
| 6 | .01 | .01 | .01 | .01 | .06 | .4  | .5 |

Therefore, by specifying the 7 mRS outcomes creates a true mean response for each duration. For example, for the null hypothesis, the probabilities for the 7 outcomes are assumed to be:

|             |      |      |     |      |      |      |      |
|-------------|------|------|-----|------|------|------|------|
| mRS         | 0    | 1    | 2   | 3    | 4    | 5    | 6    |
| Probability | 0.20 | 0.15 | 0.5 | 0.05 | 0.05 | 0.10 | 0.30 |

The mean weighted truth for this scenario is 4.85. The truth for each of the 10 durations can be varied to create many different relative effects as well as different true duration

response relationships. For each true mean weighted mRS used in the scenarios above, we show the assumed probabilities across the 7 outcomes.

| <b>mRS Assumptions</b> |              |              |              |              |                |  |
|------------------------|--------------|--------------|--------------|--------------|----------------|--|
| <b>Mean Weighted</b>   |              |              |              |              |                |  |
| <b>mRS</b>             | <b>mRS 0</b> | <b>mRS 1</b> | <b>mRS 2</b> | <b>mRS 3</b> | <b>mRS 4-6</b> |  |
| 4.25                   | 0.18         | 0.13         | 0.13         | 0.04         | 0.47           |  |
| 4.85                   | 0.2          | 0.15         | 0.15         | 0.05         | 0.45           |  |
| 5.015                  | 0.205        | 0.155        | 0.155        | 0.055        | 0.43           |  |
| 5.18                   | 0.21         | 0.16         | 0.16         | 0.06         | 0.41           |  |
| 5.2                    | 0.22         | 0.16         | 0.15         | 0.06         | 0.41           |  |
| 5.27                   | 0.21         | 0.17         | 0.16         | 0.06         | 0.4            |  |
| 5.34                   | 0.215        | 0.17         | 0.17         | 0.05         | 0.395          |  |
| 5.345                  | 0.215        | 0.165        | 0.165        | 0.065        | 0.39           |  |
| 5.39                   | 0.22         | 0.17         | 0.17         | 0.05         | 0.39           |  |
| 5.51                   | 0.22         | 0.17         | 0.17         | 0.07         | 0.37           |  |
| 5.615                  | 0.225        | 0.175        | 0.175        | 0.065        | 0.36           |  |
| 5.62                   | 0.22         | 0.18         | 0.18         | 0.06         | 0.36           |  |
| 5.675                  | 0.225        | 0.175        | 0.175        | 0.075        | 0.35           |  |
| 5.77                   | 0.25         | 0.17         | 0.15         | 0.09         | 0.34           |  |
| 5.84                   | 0.23         | 0.18         | 0.18         | 0.08         | 0.33           |  |
| 5.93                   | 0.24         | 0.19         | 0.19         | 0.05         | 0.33           |  |
| 5.95                   | 0.23         | 0.19         | 0.19         | 0.07         | 0.32           |  |
| 6.08                   | 0.26         | 0.18         | 0.15         | 0.11         | 0.3            |  |
| 6.14                   | 0.24         | 0.19         | 0.19         | 0.085        | 0.295          |  |
| 6.24                   | 0.27         | 0.18         | 0.15         | 0.12         | 0.28           |  |
| 6.38                   | 0.25         | 0.2          | 0.2          | 0.08         | 0.27           |  |
| 6.44                   | 0.25         | 0.2          | 0.2          | 0.09         | 0.26           |  |
| 6.59                   | 0.29         | 0.19         | 0.15         | 0.13         | 0.24           |  |
| 6.9                    | 0.3          | 0.2          | 0.15         | 0.15         | 0.2            |  |
| 7.04                   | 0.27         | 0.22         | 0.22         | 0.1          | 0.19           |  |



## Visualizations of distributions of mortality and mRS in virtual subjects

The following graphics illustrate the distributions of mRS scores (including the mortality) assumed for the virtual subjects assigned to each duration of cooling, and the relationship of those mRS distributions to the mean weighted mRS at each duration. Such distributions are used to generate virtual subjects for all simulated scenarios. Here, we present the three reference scenarios included in section 4.7 as examples.

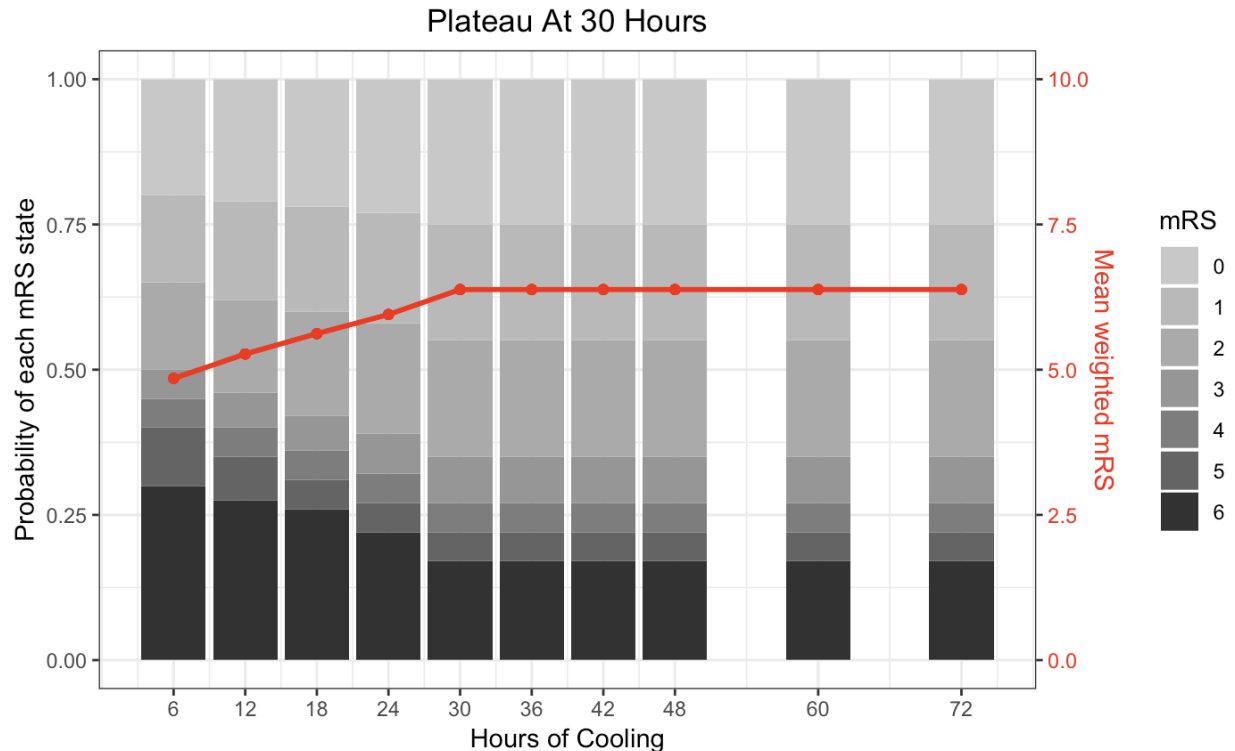

Mortality and neurological outcome (mRS) by duration of cooling group assignment  
Strong Treatment Effect at 30 Hours (Scenario 32.32 described more fully in Section 4.2.2)

The 6 hour duration in all scenarios reflects the mRS distribution found in the null scenario. At the 6 hour cooling duration the assumed mRS 6 (mortality) and mRS 4-6 (bad outcome weighted the same as death) are 30% and 45% respectively, which are consistent with control groups in prior trials. The plateau durations represent mRS distributions for the effect size being evaluated in each scenario. This is a strong effect size scenario, which the trial is designed to detect, in which mRS 6 and mRS 4-6 decrease by 14% and 18%.

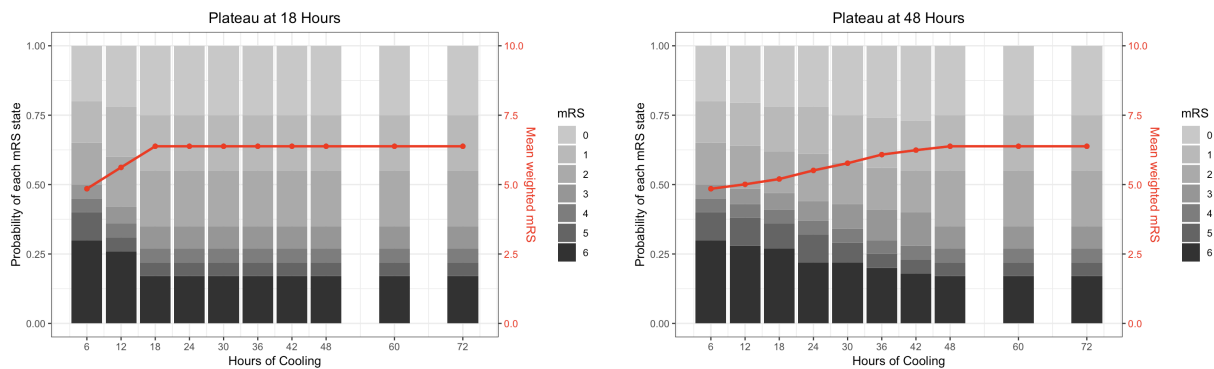

Mortality and neurological outcome (mRS) by duration of cooling group assignment  
 Strong Effect at 18 (Scenario 31.31, section 4.2.7) or 48 (Scenario 53.53, section 4.4.5)

The mortality and mRS distributions in these two scenarios are the same in virtual subjects in the 6 hour duration and at durations with plateaued strong treatment effect, but the plateau occurs earlier or later than in the reference 30 hour plateau in the prior example.
